# Supplementary material for: Despite mandated primary series, health care personnel still hesitant about COVID-19 vaccine and immunizing children
Source: PubMed Central journal article supplement — Vaccine. Author manuscript; Available in PMC 2024 Jul 24. (PMC11268435; doi:10.1016/j.vaccine.2024.04.028), 2024-04-11
Supplement: NIHMS1987289-supplement-MMC1.pdf [file NIHMS1987289-supplement-MMC1.pdf]

Codebook ▾

## Data Dictionary Codebook

01/24/2022 1:28pm

[^ Collapse all instruments](#)

| #                                                                                                            | Variable / Field Name | Field Label<br><i>Field Note</i>                                                               | Field Attributes (Field Type, Validation, Choices, Calculations, etc.)                                                                                                                                                                                                                                                       |   |           |   |           |   |            |   |             |   |             |   |           |
|--------------------------------------------------------------------------------------------------------------|-----------------------|------------------------------------------------------------------------------------------------|------------------------------------------------------------------------------------------------------------------------------------------------------------------------------------------------------------------------------------------------------------------------------------------------------------------------------|---|-----------|---|-----------|---|------------|---|-------------|---|-------------|---|-----------|
| Instrument: <b>Educate to Vaccinate</b> (educate_to_vaccinate)  Enabled as survey <a href="#">^ Collapse</a> |                       |                                                                                                |                                                                                                                                                                                                                                                                                                                              |   |           |   |           |   |            |   |             |   |             |   |           |
| 1                                                                                                            | participant_id        | Participant ID                                                                                 | text                                                                                                                                                                                                                                                                                                                         |   |           |   |           |   |            |   |             |   |             |   |           |
| 2                                                                                                            | start                 | Are you interested in participating in the survey?                                             | yesno<br><table border="1"> <tr> <td>1</td> <td>Yes</td> </tr> <tr> <td>0</td> <td>No</td> </tr> </table> <p>Custom alignment: RH<br/>Stop actions on 0</p>                                                                                                                                                                  | 1 | Yes       | 0 | No        |   |            |   |             |   |             |   |           |
| 1                                                                                                            | Yes                   |                                                                                                |                                                                                                                                                                                                                                                                                                                              |   |           |   |           |   |            |   |             |   |             |   |           |
| 0                                                                                                            | No                    |                                                                                                |                                                                                                                                                                                                                                                                                                                              |   |           |   |           |   |            |   |             |   |             |   |           |
| 3                                                                                                            | duration_employment   | Section Header: <i>Work Experience</i><br>How long have you been working for Northwell Health? | radio<br><table border="1"> <tr> <td>1</td> <td>0-2 years</td> </tr> <tr> <td>2</td> <td>3-5 years</td> </tr> <tr> <td>3</td> <td>5-10 years</td> </tr> <tr> <td>4</td> <td>10-20 years</td> </tr> <tr> <td>5</td> <td>20-30 years</td> </tr> <tr> <td>6</td> <td>&gt;30 years</td> </tr> </table> <p>Question number: 1</p> | 1 | 0-2 years | 2 | 3-5 years | 3 | 5-10 years | 4 | 10-20 years | 5 | 20-30 years | 6 | >30 years |
| 1                                                                                                            | 0-2 years             |                                                                                                |                                                                                                                                                                                                                                                                                                                              |   |           |   |           |   |            |   |             |   |             |   |           |
| 2                                                                                                            | 3-5 years             |                                                                                                |                                                                                                                                                                                                                                                                                                                              |   |           |   |           |   |            |   |             |   |             |   |           |
| 3                                                                                                            | 5-10 years            |                                                                                                |                                                                                                                                                                                                                                                                                                                              |   |           |   |           |   |            |   |             |   |             |   |           |
| 4                                                                                                            | 10-20 years           |                                                                                                |                                                                                                                                                                                                                                                                                                                              |   |           |   |           |   |            |   |             |   |             |   |           |
| 5                                                                                                            | 20-30 years           |                                                                                                |                                                                                                                                                                                                                                                                                                                              |   |           |   |           |   |            |   |             |   |             |   |           |
| 6                                                                                                            | >30 years             |                                                                                                |                                                                                                                                                                                                                                                                                                                              |   |           |   |           |   |            |   |             |   |             |   |           |
| 4                                                                                                            | duration_healthcare   | How long have you been working in the healthcare industry?                                     | radio<br><table border="1"> <tr> <td>1</td> <td>0-2 years</td> </tr> <tr> <td>2</td> <td>3-5 years</td> </tr> <tr> <td>3</td> <td>5-10 years</td> </tr> <tr> <td>4</td> <td>10-20 years</td> </tr> <tr> <td>5</td> <td>20-30 years</td> </tr> <tr> <td>6</td> <td>&gt;30 years</td> </tr> </table> <p>Question number: 2</p> | 1 | 0-2 years | 2 | 3-5 years | 3 | 5-10 years | 4 | 10-20 years | 5 | 20-30 years | 6 | >30 years |
| 1                                                                                                            | 0-2 years             |                                                                                                |                                                                                                                                                                                                                                                                                                                              |   |           |   |           |   |            |   |             |   |             |   |           |
| 2                                                                                                            | 3-5 years             |                                                                                                |                                                                                                                                                                                                                                                                                                                              |   |           |   |           |   |            |   |             |   |             |   |           |
| 3                                                                                                            | 5-10 years            |                                                                                                |                                                                                                                                                                                                                                                                                                                              |   |           |   |           |   |            |   |             |   |             |   |           |
| 4                                                                                                            | 10-20 years           |                                                                                                |                                                                                                                                                                                                                                                                                                                              |   |           |   |           |   |            |   |             |   |             |   |           |
| 5                                                                                                            | 20-30 years           |                                                                                                |                                                                                                                                                                                                                                                                                                                              |   |           |   |           |   |            |   |             |   |             |   |           |
| 6                                                                                                            | >30 years             |                                                                                                |                                                                                                                                                                                                                                                                                                                              |   |           |   |           |   |            |   |             |   |             |   |           |

|    |                                                  |                                     |                                                                                                                                                                                                                                                                                                                                                                                                                                                                                                                                                                                                                                                                                                                                                                                                                                                                                                                                                                                                                                                                                                                                                                                                                                                                                                                                                                                                                                                                                                |   |                              |   |                                     |   |                             |   |                                 |   |                                          |   |                                          |   |                                   |   |                               |   |                                      |    |                                        |    |                           |    |                                     |    |                            |    |                             |    |                                |    |                                             |    |                      |    |                              |    |         |    |                                 |    |          |    |          |    |                                                  |    |                         |    |               |    |                 |    |                 |    |              |
|----|--------------------------------------------------|-------------------------------------|------------------------------------------------------------------------------------------------------------------------------------------------------------------------------------------------------------------------------------------------------------------------------------------------------------------------------------------------------------------------------------------------------------------------------------------------------------------------------------------------------------------------------------------------------------------------------------------------------------------------------------------------------------------------------------------------------------------------------------------------------------------------------------------------------------------------------------------------------------------------------------------------------------------------------------------------------------------------------------------------------------------------------------------------------------------------------------------------------------------------------------------------------------------------------------------------------------------------------------------------------------------------------------------------------------------------------------------------------------------------------------------------------------------------------------------------------------------------------------------------|---|------------------------------|---|-------------------------------------|---|-----------------------------|---|---------------------------------|---|------------------------------------------|---|------------------------------------------|---|-----------------------------------|---|-------------------------------|---|--------------------------------------|----|----------------------------------------|----|---------------------------|----|-------------------------------------|----|----------------------------|----|-----------------------------|----|--------------------------------|----|---------------------------------------------|----|----------------------|----|------------------------------|----|---------|----|---------------------------------|----|----------|----|----------|----|--------------------------------------------------|----|-------------------------|----|---------------|----|-----------------|----|-----------------|----|--------------|
| 5  | job_function                                     | What is your PRIMARY job function?  | <p>dropdown</p> <table border="1"> <tr><td>1</td><td>Academia and Research</td></tr> <tr><td>2</td><td>Administrative Support</td></tr> <tr><td>3</td><td>Advanced Clinical Providers</td></tr> <tr><td>4</td><td>Analytics and Business Insights</td></tr> <tr><td>5</td><td>Business Services</td></tr> <tr><td>6</td><td>Business Strategy</td></tr> <tr><td>7</td><td>Clinical Care</td></tr> <tr><td>8</td><td>Clinical Laboratory</td></tr> <tr><td>9</td><td>Clinical Support</td></tr> <tr><td>10</td><td>Facilities and Support Services</td></tr> <tr><td>11</td><td>Finance</td></tr> <tr><td>12</td><td>Foundation</td></tr> <tr><td>13</td><td>General Management</td></tr> <tr><td>14</td><td>Hospitality</td></tr> <tr><td>15</td><td>Human Resources</td></tr> <tr><td>16</td><td>Information Technology and Services</td></tr> <tr><td>17</td><td>Legal and Compliance</td></tr> <tr><td>18</td><td>Marketing and Communications</td></tr> <tr><td>19</td><td>Nursing</td></tr> <tr><td>20</td><td>Patient and Customer Experience</td></tr> <tr><td>21</td><td>Pharmacy</td></tr> <tr><td>22</td><td>Provider</td></tr> <tr><td>23</td><td>Quality, Patient Safety and Infection Prevention</td></tr> <tr><td>24</td><td>Rehabilitation Services</td></tr> <tr><td>25</td><td>Revenue Cycle</td></tr> <tr><td>26</td><td>Risk Management</td></tr> <tr><td>27</td><td>Social Services</td></tr> <tr><td>28</td><td>Supply Chain</td></tr> </table> <p>Question number: 3</p> | 1 | Academia and Research        | 2 | Administrative Support              | 3 | Advanced Clinical Providers | 4 | Analytics and Business Insights | 5 | Business Services                        | 6 | Business Strategy                        | 7 | Clinical Care                     | 8 | Clinical Laboratory           | 9 | Clinical Support                     | 10 | Facilities and Support Services        | 11 | Finance                   | 12 | Foundation                          | 13 | General Management         | 14 | Hospitality                 | 15 | Human Resources                | 16 | Information Technology and Services         | 17 | Legal and Compliance | 18 | Marketing and Communications | 19 | Nursing | 20 | Patient and Customer Experience | 21 | Pharmacy | 22 | Provider | 23 | Quality, Patient Safety and Infection Prevention | 24 | Rehabilitation Services | 25 | Revenue Cycle | 26 | Risk Management | 27 | Social Services | 28 | Supply Chain |
| 1  | Academia and Research                            |                                     |                                                                                                                                                                                                                                                                                                                                                                                                                                                                                                                                                                                                                                                                                                                                                                                                                                                                                                                                                                                                                                                                                                                                                                                                                                                                                                                                                                                                                                                                                                |   |                              |   |                                     |   |                             |   |                                 |   |                                          |   |                                          |   |                                   |   |                               |   |                                      |    |                                        |    |                           |    |                                     |    |                            |    |                             |    |                                |    |                                             |    |                      |    |                              |    |         |    |                                 |    |          |    |          |    |                                                  |    |                         |    |               |    |                 |    |                 |    |              |
| 2  | Administrative Support                           |                                     |                                                                                                                                                                                                                                                                                                                                                                                                                                                                                                                                                                                                                                                                                                                                                                                                                                                                                                                                                                                                                                                                                                                                                                                                                                                                                                                                                                                                                                                                                                |   |                              |   |                                     |   |                             |   |                                 |   |                                          |   |                                          |   |                                   |   |                               |   |                                      |    |                                        |    |                           |    |                                     |    |                            |    |                             |    |                                |    |                                             |    |                      |    |                              |    |         |    |                                 |    |          |    |          |    |                                                  |    |                         |    |               |    |                 |    |                 |    |              |
| 3  | Advanced Clinical Providers                      |                                     |                                                                                                                                                                                                                                                                                                                                                                                                                                                                                                                                                                                                                                                                                                                                                                                                                                                                                                                                                                                                                                                                                                                                                                                                                                                                                                                                                                                                                                                                                                |   |                              |   |                                     |   |                             |   |                                 |   |                                          |   |                                          |   |                                   |   |                               |   |                                      |    |                                        |    |                           |    |                                     |    |                            |    |                             |    |                                |    |                                             |    |                      |    |                              |    |         |    |                                 |    |          |    |          |    |                                                  |    |                         |    |               |    |                 |    |                 |    |              |
| 4  | Analytics and Business Insights                  |                                     |                                                                                                                                                                                                                                                                                                                                                                                                                                                                                                                                                                                                                                                                                                                                                                                                                                                                                                                                                                                                                                                                                                                                                                                                                                                                                                                                                                                                                                                                                                |   |                              |   |                                     |   |                             |   |                                 |   |                                          |   |                                          |   |                                   |   |                               |   |                                      |    |                                        |    |                           |    |                                     |    |                            |    |                             |    |                                |    |                                             |    |                      |    |                              |    |         |    |                                 |    |          |    |          |    |                                                  |    |                         |    |               |    |                 |    |                 |    |              |
| 5  | Business Services                                |                                     |                                                                                                                                                                                                                                                                                                                                                                                                                                                                                                                                                                                                                                                                                                                                                                                                                                                                                                                                                                                                                                                                                                                                                                                                                                                                                                                                                                                                                                                                                                |   |                              |   |                                     |   |                             |   |                                 |   |                                          |   |                                          |   |                                   |   |                               |   |                                      |    |                                        |    |                           |    |                                     |    |                            |    |                             |    |                                |    |                                             |    |                      |    |                              |    |         |    |                                 |    |          |    |          |    |                                                  |    |                         |    |               |    |                 |    |                 |    |              |
| 6  | Business Strategy                                |                                     |                                                                                                                                                                                                                                                                                                                                                                                                                                                                                                                                                                                                                                                                                                                                                                                                                                                                                                                                                                                                                                                                                                                                                                                                                                                                                                                                                                                                                                                                                                |   |                              |   |                                     |   |                             |   |                                 |   |                                          |   |                                          |   |                                   |   |                               |   |                                      |    |                                        |    |                           |    |                                     |    |                            |    |                             |    |                                |    |                                             |    |                      |    |                              |    |         |    |                                 |    |          |    |          |    |                                                  |    |                         |    |               |    |                 |    |                 |    |              |
| 7  | Clinical Care                                    |                                     |                                                                                                                                                                                                                                                                                                                                                                                                                                                                                                                                                                                                                                                                                                                                                                                                                                                                                                                                                                                                                                                                                                                                                                                                                                                                                                                                                                                                                                                                                                |   |                              |   |                                     |   |                             |   |                                 |   |                                          |   |                                          |   |                                   |   |                               |   |                                      |    |                                        |    |                           |    |                                     |    |                            |    |                             |    |                                |    |                                             |    |                      |    |                              |    |         |    |                                 |    |          |    |          |    |                                                  |    |                         |    |               |    |                 |    |                 |    |              |
| 8  | Clinical Laboratory                              |                                     |                                                                                                                                                                                                                                                                                                                                                                                                                                                                                                                                                                                                                                                                                                                                                                                                                                                                                                                                                                                                                                                                                                                                                                                                                                                                                                                                                                                                                                                                                                |   |                              |   |                                     |   |                             |   |                                 |   |                                          |   |                                          |   |                                   |   |                               |   |                                      |    |                                        |    |                           |    |                                     |    |                            |    |                             |    |                                |    |                                             |    |                      |    |                              |    |         |    |                                 |    |          |    |          |    |                                                  |    |                         |    |               |    |                 |    |                 |    |              |
| 9  | Clinical Support                                 |                                     |                                                                                                                                                                                                                                                                                                                                                                                                                                                                                                                                                                                                                                                                                                                                                                                                                                                                                                                                                                                                                                                                                                                                                                                                                                                                                                                                                                                                                                                                                                |   |                              |   |                                     |   |                             |   |                                 |   |                                          |   |                                          |   |                                   |   |                               |   |                                      |    |                                        |    |                           |    |                                     |    |                            |    |                             |    |                                |    |                                             |    |                      |    |                              |    |         |    |                                 |    |          |    |          |    |                                                  |    |                         |    |               |    |                 |    |                 |    |              |
| 10 | Facilities and Support Services                  |                                     |                                                                                                                                                                                                                                                                                                                                                                                                                                                                                                                                                                                                                                                                                                                                                                                                                                                                                                                                                                                                                                                                                                                                                                                                                                                                                                                                                                                                                                                                                                |   |                              |   |                                     |   |                             |   |                                 |   |                                          |   |                                          |   |                                   |   |                               |   |                                      |    |                                        |    |                           |    |                                     |    |                            |    |                             |    |                                |    |                                             |    |                      |    |                              |    |         |    |                                 |    |          |    |          |    |                                                  |    |                         |    |               |    |                 |    |                 |    |              |
| 11 | Finance                                          |                                     |                                                                                                                                                                                                                                                                                                                                                                                                                                                                                                                                                                                                                                                                                                                                                                                                                                                                                                                                                                                                                                                                                                                                                                                                                                                                                                                                                                                                                                                                                                |   |                              |   |                                     |   |                             |   |                                 |   |                                          |   |                                          |   |                                   |   |                               |   |                                      |    |                                        |    |                           |    |                                     |    |                            |    |                             |    |                                |    |                                             |    |                      |    |                              |    |         |    |                                 |    |          |    |          |    |                                                  |    |                         |    |               |    |                 |    |                 |    |              |
| 12 | Foundation                                       |                                     |                                                                                                                                                                                                                                                                                                                                                                                                                                                                                                                                                                                                                                                                                                                                                                                                                                                                                                                                                                                                                                                                                                                                                                                                                                                                                                                                                                                                                                                                                                |   |                              |   |                                     |   |                             |   |                                 |   |                                          |   |                                          |   |                                   |   |                               |   |                                      |    |                                        |    |                           |    |                                     |    |                            |    |                             |    |                                |    |                                             |    |                      |    |                              |    |         |    |                                 |    |          |    |          |    |                                                  |    |                         |    |               |    |                 |    |                 |    |              |
| 13 | General Management                               |                                     |                                                                                                                                                                                                                                                                                                                                                                                                                                                                                                                                                                                                                                                                                                                                                                                                                                                                                                                                                                                                                                                                                                                                                                                                                                                                                                                                                                                                                                                                                                |   |                              |   |                                     |   |                             |   |                                 |   |                                          |   |                                          |   |                                   |   |                               |   |                                      |    |                                        |    |                           |    |                                     |    |                            |    |                             |    |                                |    |                                             |    |                      |    |                              |    |         |    |                                 |    |          |    |          |    |                                                  |    |                         |    |               |    |                 |    |                 |    |              |
| 14 | Hospitality                                      |                                     |                                                                                                                                                                                                                                                                                                                                                                                                                                                                                                                                                                                                                                                                                                                                                                                                                                                                                                                                                                                                                                                                                                                                                                                                                                                                                                                                                                                                                                                                                                |   |                              |   |                                     |   |                             |   |                                 |   |                                          |   |                                          |   |                                   |   |                               |   |                                      |    |                                        |    |                           |    |                                     |    |                            |    |                             |    |                                |    |                                             |    |                      |    |                              |    |         |    |                                 |    |          |    |          |    |                                                  |    |                         |    |               |    |                 |    |                 |    |              |
| 15 | Human Resources                                  |                                     |                                                                                                                                                                                                                                                                                                                                                                                                                                                                                                                                                                                                                                                                                                                                                                                                                                                                                                                                                                                                                                                                                                                                                                                                                                                                                                                                                                                                                                                                                                |   |                              |   |                                     |   |                             |   |                                 |   |                                          |   |                                          |   |                                   |   |                               |   |                                      |    |                                        |    |                           |    |                                     |    |                            |    |                             |    |                                |    |                                             |    |                      |    |                              |    |         |    |                                 |    |          |    |          |    |                                                  |    |                         |    |               |    |                 |    |                 |    |              |
| 16 | Information Technology and Services              |                                     |                                                                                                                                                                                                                                                                                                                                                                                                                                                                                                                                                                                                                                                                                                                                                                                                                                                                                                                                                                                                                                                                                                                                                                                                                                                                                                                                                                                                                                                                                                |   |                              |   |                                     |   |                             |   |                                 |   |                                          |   |                                          |   |                                   |   |                               |   |                                      |    |                                        |    |                           |    |                                     |    |                            |    |                             |    |                                |    |                                             |    |                      |    |                              |    |         |    |                                 |    |          |    |          |    |                                                  |    |                         |    |               |    |                 |    |                 |    |              |
| 17 | Legal and Compliance                             |                                     |                                                                                                                                                                                                                                                                                                                                                                                                                                                                                                                                                                                                                                                                                                                                                                                                                                                                                                                                                                                                                                                                                                                                                                                                                                                                                                                                                                                                                                                                                                |   |                              |   |                                     |   |                             |   |                                 |   |                                          |   |                                          |   |                                   |   |                               |   |                                      |    |                                        |    |                           |    |                                     |    |                            |    |                             |    |                                |    |                                             |    |                      |    |                              |    |         |    |                                 |    |          |    |          |    |                                                  |    |                         |    |               |    |                 |    |                 |    |              |
| 18 | Marketing and Communications                     |                                     |                                                                                                                                                                                                                                                                                                                                                                                                                                                                                                                                                                                                                                                                                                                                                                                                                                                                                                                                                                                                                                                                                                                                                                                                                                                                                                                                                                                                                                                                                                |   |                              |   |                                     |   |                             |   |                                 |   |                                          |   |                                          |   |                                   |   |                               |   |                                      |    |                                        |    |                           |    |                                     |    |                            |    |                             |    |                                |    |                                             |    |                      |    |                              |    |         |    |                                 |    |          |    |          |    |                                                  |    |                         |    |               |    |                 |    |                 |    |              |
| 19 | Nursing                                          |                                     |                                                                                                                                                                                                                                                                                                                                                                                                                                                                                                                                                                                                                                                                                                                                                                                                                                                                                                                                                                                                                                                                                                                                                                                                                                                                                                                                                                                                                                                                                                |   |                              |   |                                     |   |                             |   |                                 |   |                                          |   |                                          |   |                                   |   |                               |   |                                      |    |                                        |    |                           |    |                                     |    |                            |    |                             |    |                                |    |                                             |    |                      |    |                              |    |         |    |                                 |    |          |    |          |    |                                                  |    |                         |    |               |    |                 |    |                 |    |              |
| 20 | Patient and Customer Experience                  |                                     |                                                                                                                                                                                                                                                                                                                                                                                                                                                                                                                                                                                                                                                                                                                                                                                                                                                                                                                                                                                                                                                                                                                                                                                                                                                                                                                                                                                                                                                                                                |   |                              |   |                                     |   |                             |   |                                 |   |                                          |   |                                          |   |                                   |   |                               |   |                                      |    |                                        |    |                           |    |                                     |    |                            |    |                             |    |                                |    |                                             |    |                      |    |                              |    |         |    |                                 |    |          |    |          |    |                                                  |    |                         |    |               |    |                 |    |                 |    |              |
| 21 | Pharmacy                                         |                                     |                                                                                                                                                                                                                                                                                                                                                                                                                                                                                                                                                                                                                                                                                                                                                                                                                                                                                                                                                                                                                                                                                                                                                                                                                                                                                                                                                                                                                                                                                                |   |                              |   |                                     |   |                             |   |                                 |   |                                          |   |                                          |   |                                   |   |                               |   |                                      |    |                                        |    |                           |    |                                     |    |                            |    |                             |    |                                |    |                                             |    |                      |    |                              |    |         |    |                                 |    |          |    |          |    |                                                  |    |                         |    |               |    |                 |    |                 |    |              |
| 22 | Provider                                         |                                     |                                                                                                                                                                                                                                                                                                                                                                                                                                                                                                                                                                                                                                                                                                                                                                                                                                                                                                                                                                                                                                                                                                                                                                                                                                                                                                                                                                                                                                                                                                |   |                              |   |                                     |   |                             |   |                                 |   |                                          |   |                                          |   |                                   |   |                               |   |                                      |    |                                        |    |                           |    |                                     |    |                            |    |                             |    |                                |    |                                             |    |                      |    |                              |    |         |    |                                 |    |          |    |          |    |                                                  |    |                         |    |               |    |                 |    |                 |    |              |
| 23 | Quality, Patient Safety and Infection Prevention |                                     |                                                                                                                                                                                                                                                                                                                                                                                                                                                                                                                                                                                                                                                                                                                                                                                                                                                                                                                                                                                                                                                                                                                                                                                                                                                                                                                                                                                                                                                                                                |   |                              |   |                                     |   |                             |   |                                 |   |                                          |   |                                          |   |                                   |   |                               |   |                                      |    |                                        |    |                           |    |                                     |    |                            |    |                             |    |                                |    |                                             |    |                      |    |                              |    |         |    |                                 |    |          |    |          |    |                                                  |    |                         |    |               |    |                 |    |                 |    |              |
| 24 | Rehabilitation Services                          |                                     |                                                                                                                                                                                                                                                                                                                                                                                                                                                                                                                                                                                                                                                                                                                                                                                                                                                                                                                                                                                                                                                                                                                                                                                                                                                                                                                                                                                                                                                                                                |   |                              |   |                                     |   |                             |   |                                 |   |                                          |   |                                          |   |                                   |   |                               |   |                                      |    |                                        |    |                           |    |                                     |    |                            |    |                             |    |                                |    |                                             |    |                      |    |                              |    |         |    |                                 |    |          |    |          |    |                                                  |    |                         |    |               |    |                 |    |                 |    |              |
| 25 | Revenue Cycle                                    |                                     |                                                                                                                                                                                                                                                                                                                                                                                                                                                                                                                                                                                                                                                                                                                                                                                                                                                                                                                                                                                                                                                                                                                                                                                                                                                                                                                                                                                                                                                                                                |   |                              |   |                                     |   |                             |   |                                 |   |                                          |   |                                          |   |                                   |   |                               |   |                                      |    |                                        |    |                           |    |                                     |    |                            |    |                             |    |                                |    |                                             |    |                      |    |                              |    |         |    |                                 |    |          |    |          |    |                                                  |    |                         |    |               |    |                 |    |                 |    |              |
| 26 | Risk Management                                  |                                     |                                                                                                                                                                                                                                                                                                                                                                                                                                                                                                                                                                                                                                                                                                                                                                                                                                                                                                                                                                                                                                                                                                                                                                                                                                                                                                                                                                                                                                                                                                |   |                              |   |                                     |   |                             |   |                                 |   |                                          |   |                                          |   |                                   |   |                               |   |                                      |    |                                        |    |                           |    |                                     |    |                            |    |                             |    |                                |    |                                             |    |                      |    |                              |    |         |    |                                 |    |          |    |          |    |                                                  |    |                         |    |               |    |                 |    |                 |    |              |
| 27 | Social Services                                  |                                     |                                                                                                                                                                                                                                                                                                                                                                                                                                                                                                                                                                                                                                                                                                                                                                                                                                                                                                                                                                                                                                                                                                                                                                                                                                                                                                                                                                                                                                                                                                |   |                              |   |                                     |   |                             |   |                                 |   |                                          |   |                                          |   |                                   |   |                               |   |                                      |    |                                        |    |                           |    |                                     |    |                            |    |                             |    |                                |    |                                             |    |                      |    |                              |    |         |    |                                 |    |          |    |          |    |                                                  |    |                         |    |               |    |                 |    |                 |    |              |
| 28 | Supply Chain                                     |                                     |                                                                                                                                                                                                                                                                                                                                                                                                                                                                                                                                                                                                                                                                                                                                                                                                                                                                                                                                                                                                                                                                                                                                                                                                                                                                                                                                                                                                                                                                                                |   |                              |   |                                     |   |                             |   |                                 |   |                                          |   |                                          |   |                                   |   |                               |   |                                      |    |                                        |    |                           |    |                                     |    |                            |    |                             |    |                                |    |                                             |    |                      |    |                              |    |         |    |                                 |    |          |    |          |    |                                                  |    |                         |    |               |    |                 |    |                 |    |              |
| 6  | job_location                                     | Where is your PRIMARY job location? | <p>dropdown</p> <table border="1"> <tr><td>1</td><td>Ambulatory/NHPP - Anesthesia</td></tr> <tr><td>2</td><td>Ambulatory/NHPP - Behavioral Health</td></tr> <tr><td>3</td><td>Ambulatory/NHPP - Cancer</td></tr> <tr><td>4</td><td>Ambulatory/NHPP - Cardiology</td></tr> <tr><td>5</td><td>Ambulatory/NHPP - Cardiothoracic Surgery</td></tr> <tr><td>6</td><td>Ambulatory/NHPP - Concorde Medical Group</td></tr> <tr><td>7</td><td>Ambulatory/NHPP - Dental Medicine</td></tr> <tr><td>8</td><td>Ambulatory/NHPP - Dermatology</td></tr> <tr><td>9</td><td>Ambulatory/NHPP - Emergency Medicine</td></tr> <tr><td>10</td><td>Ambulatory/NHPP - Feinstein Institutes</td></tr> <tr><td>11</td><td>Ambulatory/NHPP - Imaging</td></tr> <tr><td>12</td><td>Ambulatory/NHPP - Mather Harborview</td></tr> <tr><td>13</td><td>Ambulatory/NHPP - Medicine</td></tr> <tr><td>14</td><td>Ambulatory/NHPP - Neurology</td></tr> <tr><td>15</td><td>Ambulatory/NHPP - Neurosurgery</td></tr> <tr><td>16</td><td>Ambulatory/NHPP - Obstetrics and Gynecology</td></tr> </table>                                                                                                                                                                                                                                                                                                                                                                                                                        | 1 | Ambulatory/NHPP - Anesthesia | 2 | Ambulatory/NHPP - Behavioral Health | 3 | Ambulatory/NHPP - Cancer    | 4 | Ambulatory/NHPP - Cardiology    | 5 | Ambulatory/NHPP - Cardiothoracic Surgery | 6 | Ambulatory/NHPP - Concorde Medical Group | 7 | Ambulatory/NHPP - Dental Medicine | 8 | Ambulatory/NHPP - Dermatology | 9 | Ambulatory/NHPP - Emergency Medicine | 10 | Ambulatory/NHPP - Feinstein Institutes | 11 | Ambulatory/NHPP - Imaging | 12 | Ambulatory/NHPP - Mather Harborview | 13 | Ambulatory/NHPP - Medicine | 14 | Ambulatory/NHPP - Neurology | 15 | Ambulatory/NHPP - Neurosurgery | 16 | Ambulatory/NHPP - Obstetrics and Gynecology |    |                      |    |                              |    |         |    |                                 |    |          |    |          |    |                                                  |    |                         |    |               |    |                 |    |                 |    |              |
| 1  | Ambulatory/NHPP - Anesthesia                     |                                     |                                                                                                                                                                                                                                                                                                                                                                                                                                                                                                                                                                                                                                                                                                                                                                                                                                                                                                                                                                                                                                                                                                                                                                                                                                                                                                                                                                                                                                                                                                |   |                              |   |                                     |   |                             |   |                                 |   |                                          |   |                                          |   |                                   |   |                               |   |                                      |    |                                        |    |                           |    |                                     |    |                            |    |                             |    |                                |    |                                             |    |                      |    |                              |    |         |    |                                 |    |          |    |          |    |                                                  |    |                         |    |               |    |                 |    |                 |    |              |
| 2  | Ambulatory/NHPP - Behavioral Health              |                                     |                                                                                                                                                                                                                                                                                                                                                                                                                                                                                                                                                                                                                                                                                                                                                                                                                                                                                                                                                                                                                                                                                                                                                                                                                                                                                                                                                                                                                                                                                                |   |                              |   |                                     |   |                             |   |                                 |   |                                          |   |                                          |   |                                   |   |                               |   |                                      |    |                                        |    |                           |    |                                     |    |                            |    |                             |    |                                |    |                                             |    |                      |    |                              |    |         |    |                                 |    |          |    |          |    |                                                  |    |                         |    |               |    |                 |    |                 |    |              |
| 3  | Ambulatory/NHPP - Cancer                         |                                     |                                                                                                                                                                                                                                                                                                                                                                                                                                                                                                                                                                                                                                                                                                                                                                                                                                                                                                                                                                                                                                                                                                                                                                                                                                                                                                                                                                                                                                                                                                |   |                              |   |                                     |   |                             |   |                                 |   |                                          |   |                                          |   |                                   |   |                               |   |                                      |    |                                        |    |                           |    |                                     |    |                            |    |                             |    |                                |    |                                             |    |                      |    |                              |    |         |    |                                 |    |          |    |          |    |                                                  |    |                         |    |               |    |                 |    |                 |    |              |
| 4  | Ambulatory/NHPP - Cardiology                     |                                     |                                                                                                                                                                                                                                                                                                                                                                                                                                                                                                                                                                                                                                                                                                                                                                                                                                                                                                                                                                                                                                                                                                                                                                                                                                                                                                                                                                                                                                                                                                |   |                              |   |                                     |   |                             |   |                                 |   |                                          |   |                                          |   |                                   |   |                               |   |                                      |    |                                        |    |                           |    |                                     |    |                            |    |                             |    |                                |    |                                             |    |                      |    |                              |    |         |    |                                 |    |          |    |          |    |                                                  |    |                         |    |               |    |                 |    |                 |    |              |
| 5  | Ambulatory/NHPP - Cardiothoracic Surgery         |                                     |                                                                                                                                                                                                                                                                                                                                                                                                                                                                                                                                                                                                                                                                                                                                                                                                                                                                                                                                                                                                                                                                                                                                                                                                                                                                                                                                                                                                                                                                                                |   |                              |   |                                     |   |                             |   |                                 |   |                                          |   |                                          |   |                                   |   |                               |   |                                      |    |                                        |    |                           |    |                                     |    |                            |    |                             |    |                                |    |                                             |    |                      |    |                              |    |         |    |                                 |    |          |    |          |    |                                                  |    |                         |    |               |    |                 |    |                 |    |              |
| 6  | Ambulatory/NHPP - Concorde Medical Group         |                                     |                                                                                                                                                                                                                                                                                                                                                                                                                                                                                                                                                                                                                                                                                                                                                                                                                                                                                                                                                                                                                                                                                                                                                                                                                                                                                                                                                                                                                                                                                                |   |                              |   |                                     |   |                             |   |                                 |   |                                          |   |                                          |   |                                   |   |                               |   |                                      |    |                                        |    |                           |    |                                     |    |                            |    |                             |    |                                |    |                                             |    |                      |    |                              |    |         |    |                                 |    |          |    |          |    |                                                  |    |                         |    |               |    |                 |    |                 |    |              |
| 7  | Ambulatory/NHPP - Dental Medicine                |                                     |                                                                                                                                                                                                                                                                                                                                                                                                                                                                                                                                                                                                                                                                                                                                                                                                                                                                                                                                                                                                                                                                                                                                                                                                                                                                                                                                                                                                                                                                                                |   |                              |   |                                     |   |                             |   |                                 |   |                                          |   |                                          |   |                                   |   |                               |   |                                      |    |                                        |    |                           |    |                                     |    |                            |    |                             |    |                                |    |                                             |    |                      |    |                              |    |         |    |                                 |    |          |    |          |    |                                                  |    |                         |    |               |    |                 |    |                 |    |              |
| 8  | Ambulatory/NHPP - Dermatology                    |                                     |                                                                                                                                                                                                                                                                                                                                                                                                                                                                                                                                                                                                                                                                                                                                                                                                                                                                                                                                                                                                                                                                                                                                                                                                                                                                                                                                                                                                                                                                                                |   |                              |   |                                     |   |                             |   |                                 |   |                                          |   |                                          |   |                                   |   |                               |   |                                      |    |                                        |    |                           |    |                                     |    |                            |    |                             |    |                                |    |                                             |    |                      |    |                              |    |         |    |                                 |    |          |    |          |    |                                                  |    |                         |    |               |    |                 |    |                 |    |              |
| 9  | Ambulatory/NHPP - Emergency Medicine             |                                     |                                                                                                                                                                                                                                                                                                                                                                                                                                                                                                                                                                                                                                                                                                                                                                                                                                                                                                                                                                                                                                                                                                                                                                                                                                                                                                                                                                                                                                                                                                |   |                              |   |                                     |   |                             |   |                                 |   |                                          |   |                                          |   |                                   |   |                               |   |                                      |    |                                        |    |                           |    |                                     |    |                            |    |                             |    |                                |    |                                             |    |                      |    |                              |    |         |    |                                 |    |          |    |          |    |                                                  |    |                         |    |               |    |                 |    |                 |    |              |
| 10 | Ambulatory/NHPP - Feinstein Institutes           |                                     |                                                                                                                                                                                                                                                                                                                                                                                                                                                                                                                                                                                                                                                                                                                                                                                                                                                                                                                                                                                                                                                                                                                                                                                                                                                                                                                                                                                                                                                                                                |   |                              |   |                                     |   |                             |   |                                 |   |                                          |   |                                          |   |                                   |   |                               |   |                                      |    |                                        |    |                           |    |                                     |    |                            |    |                             |    |                                |    |                                             |    |                      |    |                              |    |         |    |                                 |    |          |    |          |    |                                                  |    |                         |    |               |    |                 |    |                 |    |              |
| 11 | Ambulatory/NHPP - Imaging                        |                                     |                                                                                                                                                                                                                                                                                                                                                                                                                                                                                                                                                                                                                                                                                                                                                                                                                                                                                                                                                                                                                                                                                                                                                                                                                                                                                                                                                                                                                                                                                                |   |                              |   |                                     |   |                             |   |                                 |   |                                          |   |                                          |   |                                   |   |                               |   |                                      |    |                                        |    |                           |    |                                     |    |                            |    |                             |    |                                |    |                                             |    |                      |    |                              |    |         |    |                                 |    |          |    |          |    |                                                  |    |                         |    |               |    |                 |    |                 |    |              |
| 12 | Ambulatory/NHPP - Mather Harborview              |                                     |                                                                                                                                                                                                                                                                                                                                                                                                                                                                                                                                                                                                                                                                                                                                                                                                                                                                                                                                                                                                                                                                                                                                                                                                                                                                                                                                                                                                                                                                                                |   |                              |   |                                     |   |                             |   |                                 |   |                                          |   |                                          |   |                                   |   |                               |   |                                      |    |                                        |    |                           |    |                                     |    |                            |    |                             |    |                                |    |                                             |    |                      |    |                              |    |         |    |                                 |    |          |    |          |    |                                                  |    |                         |    |               |    |                 |    |                 |    |              |
| 13 | Ambulatory/NHPP - Medicine                       |                                     |                                                                                                                                                                                                                                                                                                                                                                                                                                                                                                                                                                                                                                                                                                                                                                                                                                                                                                                                                                                                                                                                                                                                                                                                                                                                                                                                                                                                                                                                                                |   |                              |   |                                     |   |                             |   |                                 |   |                                          |   |                                          |   |                                   |   |                               |   |                                      |    |                                        |    |                           |    |                                     |    |                            |    |                             |    |                                |    |                                             |    |                      |    |                              |    |         |    |                                 |    |          |    |          |    |                                                  |    |                         |    |               |    |                 |    |                 |    |              |
| 14 | Ambulatory/NHPP - Neurology                      |                                     |                                                                                                                                                                                                                                                                                                                                                                                                                                                                                                                                                                                                                                                                                                                                                                                                                                                                                                                                                                                                                                                                                                                                                                                                                                                                                                                                                                                                                                                                                                |   |                              |   |                                     |   |                             |   |                                 |   |                                          |   |                                          |   |                                   |   |                               |   |                                      |    |                                        |    |                           |    |                                     |    |                            |    |                             |    |                                |    |                                             |    |                      |    |                              |    |         |    |                                 |    |          |    |          |    |                                                  |    |                         |    |               |    |                 |    |                 |    |              |
| 15 | Ambulatory/NHPP - Neurosurgery                   |                                     |                                                                                                                                                                                                                                                                                                                                                                                                                                                                                                                                                                                                                                                                                                                                                                                                                                                                                                                                                                                                                                                                                                                                                                                                                                                                                                                                                                                                                                                                                                |   |                              |   |                                     |   |                             |   |                                 |   |                                          |   |                                          |   |                                   |   |                               |   |                                      |    |                                        |    |                           |    |                                     |    |                            |    |                             |    |                                |    |                                             |    |                      |    |                              |    |         |    |                                 |    |          |    |          |    |                                                  |    |                         |    |               |    |                 |    |                 |    |              |
| 16 | Ambulatory/NHPP - Obstetrics and Gynecology      |                                     |                                                                                                                                                                                                                                                                                                                                                                                                                                                                                                                                                                                                                                                                                                                                                                                                                                                                                                                                                                                                                                                                                                                                                                                                                                                                                                                                                                                                                                                                                                |   |                              |   |                                     |   |                             |   |                                 |   |                                          |   |                                          |   |                                   |   |                               |   |                                      |    |                                        |    |                           |    |                                     |    |                            |    |                             |    |                                |    |                                             |    |                      |    |                              |    |         |    |                                 |    |          |    |          |    |                                                  |    |                         |    |               |    |                 |    |                 |    |              |

|    |                                               |
|----|-----------------------------------------------|
| 17 | Ambulatory/NHPP - Ophthalmology               |
| 18 | Ambulatory/NHPP - Orlin & Cohen               |
| 19 | Ambulatory/NHPP - Orthopedics                 |
| 20 | Ambulatory/NHPP - Otolaryngology              |
| 21 | Ambulatory/NHPP - Pathology                   |
| 22 | Ambulatory/NHPP - Peconic Bay Medical Group   |
| 23 | Ambulatory/NHPP - Pediatrics                  |
| 24 | Ambulatory/NHPP - Phelps Medical Associates   |
| 25 | Ambulatory/NHPP - PM&R                        |
| 26 | Ambulatory/NHPP - Surgery                     |
| 27 | Ambulatory/NHPP - University Physicians Group |
| 28 | Ambulatory/NHPP - Urology                     |
| 29 | Ambulatory/NHPP - Westchester Health          |
| 30 | Central - Cohen Children's Medical Center     |
| 31 | Central - CFAM - Ambulatory Surgery           |
| 32 | Central - LIJ Forest Hills                    |
| 33 | Central - LIJ Medical Center                  |
| 34 | Central - LIJ Valley Stream                   |
| 35 | Central - North Shore University Hospital     |
| 36 | Central - Zucker Hillside Hospital            |
| 37 | Corporate - Brooklyn Region                   |
| 38 | Corporate - CEMS                              |
| 39 | Corporate - Centralized Business Services     |
| 40 | Corporate - Centralized Policy Procedure      |
| 41 | Corporate - Chief Med Officer                 |
| 42 | Corporate - CLI                               |
| 43 | Corporate - Community Health                  |
| 44 | Corporate - Community Relations               |
| 45 | Corporate - Corporate Facilities Services     |
| 46 | Corporate - Corporate Real Estate             |
| 47 | Corporate - Corporate Security                |
| 48 | Corporate - Digital Pt Exp Transformation     |
| 49 | Corporate - Emergency Management              |
| 50 | Corporate - Executives                        |
| 51 | Corporate - Finance                           |
| 52 | Corporate - FlexStaff                         |
| 53 | Corporate - Foundation                        |
| 54 | Corporate - FPP Administration                |
| 55 | Corporate - Health Solutions                  |
| 56 | Corporate - HR                                |
| 57 | Corporate - Katz Institute for Women's Health |
| 58 | Corporate - Legal                             |
| 59 | Corporate - Managed Care                      |
| 60 | Corporate - Marketing & Communications        |
| 61 | Corporate - Medical Group IPA                 |
| 62 | Corporate - MGCOR - Finance                   |

|     |                                                     |
|-----|-----------------------------------------------------|
| 63  | Corporate - Northwell Direct                        |
| 64  | Corporate - Northwell Holdings                      |
| 65  | Corporate - Nursing                                 |
| 66  | Corporate - OCIO                                    |
| 67  | Corporate - Other Administration                    |
| 68  | Corporate - Patient Access Services                 |
| 69  | Corporate - Patient Experience                      |
| 70  | Corporate - Revenue Cycle                           |
| 71  | Corporate - Risk Management                         |
| 72  | Corporate - Strategic Planning                      |
| 73  | Corporate - Syst Administration                     |
| 74  | Corporate - System Perioperative Services           |
| 75  | Corporate - System Project Mgmt Office              |
| 76  | Corporate - The Center for Equity of Care           |
| 77  | Corporate - Vanguard                                |
| 78  | Corporate - Workforce Safety                        |
| 79  | Eastern - Glen Cove Hospital                        |
| 80  | Eastern - Huntington Hospital                       |
| 81  | Eastern - Mather Hospital                           |
| 82  | Eastern - Peconic Bay Medical Center                |
| 83  | Eastern - Plainview Hospital                        |
| 84  | Eastern - South Oaks Hospital                       |
| 85  | Eastern - South Shore University Hospital           |
| 86  | Eastern - Syosset Hospital                          |
| 87  | Post Acute - Hospice                                |
| 88  | Post Acute - LIJ Medical Center - Homecare          |
| 89  | Post Acute - Northwell - Homecare Corporate         |
| 90  | Post Acute - Northwell Laboratories                 |
| 91  | Post Acute - NSUH at Manhasset - Homecare           |
| 92  | Post Acute - Orzac Rehab                            |
| 93  | Post Acute - Regioncare                             |
| 94  | Post Acute - Rehab at Home Manhasset                |
| 95  | Post Acute - STARS                                  |
| 96  | Post Acute - Stern Rehab                            |
| 97  | Post Acute - Transition Program                     |
| 98  | Post Acute - VNA Hospice                            |
| 99  | Post Acute - VNA HV Putnam                          |
| 100 | Post Acute - VNA Licensed Agency                    |
| 101 | Western - Lenox Health Greenwich Village            |
| 102 | Western - Lenox Hill Hospital                       |
| 103 | Western - Manhattan Eye, Ear & Throat Hospital      |
| 104 | Western - Northern Westchester Hospital             |
| 105 | Western - Phelps Memorial Hospital                  |
| 106 | Western - Staten Island University Hospital - North |
| 107 | Western - Staten Island University Hospital - South |
| 108 | Other                                               |

|    |                                  |                                                        |                                                                                                                                                                                                                                                                                                                                                                                                                                                                        |   |                           |   |                        |   |                      |   |                               |   |                                  |   |                   |   |                   |   |                    |   |                        |
|----|----------------------------------|--------------------------------------------------------|------------------------------------------------------------------------------------------------------------------------------------------------------------------------------------------------------------------------------------------------------------------------------------------------------------------------------------------------------------------------------------------------------------------------------------------------------------------------|---|---------------------------|---|------------------------|---|----------------------|---|-------------------------------|---|----------------------------------|---|-------------------|---|-------------------|---|--------------------|---|------------------------|
|    |                                  |                                                        | Question number: 4                                                                                                                                                                                                                                                                                                                                                                                                                                                     |   |                           |   |                        |   |                      |   |                               |   |                                  |   |                   |   |                   |   |                    |   |                        |
| 7  | age                              | Section Header: <i>Demographic information</i><br>Age: | dropdown<br><table border="1"> <tr><td>1</td><td>18-25 years</td></tr> <tr><td>2</td><td>26-35 years</td></tr> <tr><td>3</td><td>36-45 years</td></tr> <tr><td>4</td><td>46-55 years</td></tr> <tr><td>5</td><td>55-65 years</td></tr> <tr><td>6</td><td>&gt;65 years</td></tr> </table>                                                                                                                                                                               | 1 | 18-25 years               | 2 | 26-35 years            | 3 | 36-45 years          | 4 | 46-55 years                   | 5 | 55-65 years                      | 6 | >65 years         |   |                   |   |                    |   |                        |
| 1  | 18-25 years                      |                                                        |                                                                                                                                                                                                                                                                                                                                                                                                                                                                        |   |                           |   |                        |   |                      |   |                               |   |                                  |   |                   |   |                   |   |                    |   |                        |
| 2  | 26-35 years                      |                                                        |                                                                                                                                                                                                                                                                                                                                                                                                                                                                        |   |                           |   |                        |   |                      |   |                               |   |                                  |   |                   |   |                   |   |                    |   |                        |
| 3  | 36-45 years                      |                                                        |                                                                                                                                                                                                                                                                                                                                                                                                                                                                        |   |                           |   |                        |   |                      |   |                               |   |                                  |   |                   |   |                   |   |                    |   |                        |
| 4  | 46-55 years                      |                                                        |                                                                                                                                                                                                                                                                                                                                                                                                                                                                        |   |                           |   |                        |   |                      |   |                               |   |                                  |   |                   |   |                   |   |                    |   |                        |
| 5  | 55-65 years                      |                                                        |                                                                                                                                                                                                                                                                                                                                                                                                                                                                        |   |                           |   |                        |   |                      |   |                               |   |                                  |   |                   |   |                   |   |                    |   |                        |
| 6  | >65 years                        |                                                        |                                                                                                                                                                                                                                                                                                                                                                                                                                                                        |   |                           |   |                        |   |                      |   |                               |   |                                  |   |                   |   |                   |   |                    |   |                        |
| 8  | sex                              | Sex:                                                   | dropdown<br><table border="1"> <tr><td>1</td><td>Female</td></tr> <tr><td>2</td><td>Male</td></tr> <tr><td>3</td><td>Prefer not to answer</td></tr> </table>                                                                                                                                                                                                                                                                                                           | 1 | Female                    | 2 | Male                   | 3 | Prefer not to answer |   |                               |   |                                  |   |                   |   |                   |   |                    |   |                        |
| 1  | Female                           |                                                        |                                                                                                                                                                                                                                                                                                                                                                                                                                                                        |   |                           |   |                        |   |                      |   |                               |   |                                  |   |                   |   |                   |   |                    |   |                        |
| 2  | Male                             |                                                        |                                                                                                                                                                                                                                                                                                                                                                                                                                                                        |   |                           |   |                        |   |                      |   |                               |   |                                  |   |                   |   |                   |   |                    |   |                        |
| 3  | Prefer not to answer             |                                                        |                                                                                                                                                                                                                                                                                                                                                                                                                                                                        |   |                           |   |                        |   |                      |   |                               |   |                                  |   |                   |   |                   |   |                    |   |                        |
| 9  | gender                           | Gender:                                                | dropdown<br><table border="1"> <tr><td>1</td><td>Identify as female</td></tr> <tr><td>2</td><td>Identify as male</td></tr> <tr><td>3</td><td>Non-binary</td></tr> <tr><td>4</td><td>Prefer not to answer</td></tr> </table>                                                                                                                                                                                                                                            | 1 | Identify as female        | 2 | Identify as male       | 3 | Non-binary           | 4 | Prefer not to answer          |   |                                  |   |                   |   |                   |   |                    |   |                        |
| 1  | Identify as female               |                                                        |                                                                                                                                                                                                                                                                                                                                                                                                                                                                        |   |                           |   |                        |   |                      |   |                               |   |                                  |   |                   |   |                   |   |                    |   |                        |
| 2  | Identify as male                 |                                                        |                                                                                                                                                                                                                                                                                                                                                                                                                                                                        |   |                           |   |                        |   |                      |   |                               |   |                                  |   |                   |   |                   |   |                    |   |                        |
| 3  | Non-binary                       |                                                        |                                                                                                                                                                                                                                                                                                                                                                                                                                                                        |   |                           |   |                        |   |                      |   |                               |   |                                  |   |                   |   |                   |   |                    |   |                        |
| 4  | Prefer not to answer             |                                                        |                                                                                                                                                                                                                                                                                                                                                                                                                                                                        |   |                           |   |                        |   |                      |   |                               |   |                                  |   |                   |   |                   |   |                    |   |                        |
| 10 | ethnicity                        | Ethnicity:                                             | dropdown<br><table border="1"> <tr><td>1</td><td>Hispanic or Latinx</td></tr> <tr><td>2</td><td>Not Hispanic or Latinx</td></tr> </table>                                                                                                                                                                                                                                                                                                                              | 1 | Hispanic or Latinx        | 2 | Not Hispanic or Latinx |   |                      |   |                               |   |                                  |   |                   |   |                   |   |                    |   |                        |
| 1  | Hispanic or Latinx               |                                                        |                                                                                                                                                                                                                                                                                                                                                                                                                                                                        |   |                           |   |                        |   |                      |   |                               |   |                                  |   |                   |   |                   |   |                    |   |                        |
| 2  | Not Hispanic or Latinx           |                                                        |                                                                                                                                                                                                                                                                                                                                                                                                                                                                        |   |                           |   |                        |   |                      |   |                               |   |                                  |   |                   |   |                   |   |                    |   |                        |
| 11 | race                             | Race:                                                  | dropdown<br><table border="1"> <tr><td>1</td><td>African American or Black</td></tr> <tr><td>2</td><td>Caucasian or White</td></tr> <tr><td>3</td><td>Asian American</td></tr> <tr><td>4</td><td>American Indian/Alaska Native</td></tr> <tr><td>5</td><td>Native Hawaiian/Pacific Islander</td></tr> <tr><td>6</td><td>Multi-racial</td></tr> </table>                                                                                                                | 1 | African American or Black | 2 | Caucasian or White     | 3 | Asian American       | 4 | American Indian/Alaska Native | 5 | Native Hawaiian/Pacific Islander | 6 | Multi-racial      |   |                   |   |                    |   |                        |
| 1  | African American or Black        |                                                        |                                                                                                                                                                                                                                                                                                                                                                                                                                                                        |   |                           |   |                        |   |                      |   |                               |   |                                  |   |                   |   |                   |   |                    |   |                        |
| 2  | Caucasian or White               |                                                        |                                                                                                                                                                                                                                                                                                                                                                                                                                                                        |   |                           |   |                        |   |                      |   |                               |   |                                  |   |                   |   |                   |   |                    |   |                        |
| 3  | Asian American                   |                                                        |                                                                                                                                                                                                                                                                                                                                                                                                                                                                        |   |                           |   |                        |   |                      |   |                               |   |                                  |   |                   |   |                   |   |                    |   |                        |
| 4  | American Indian/Alaska Native    |                                                        |                                                                                                                                                                                                                                                                                                                                                                                                                                                                        |   |                           |   |                        |   |                      |   |                               |   |                                  |   |                   |   |                   |   |                    |   |                        |
| 5  | Native Hawaiian/Pacific Islander |                                                        |                                                                                                                                                                                                                                                                                                                                                                                                                                                                        |   |                           |   |                        |   |                      |   |                               |   |                                  |   |                   |   |                   |   |                    |   |                        |
| 6  | Multi-racial                     |                                                        |                                                                                                                                                                                                                                                                                                                                                                                                                                                                        |   |                           |   |                        |   |                      |   |                               |   |                                  |   |                   |   |                   |   |                    |   |                        |
| 12 | income                           | Income Range:                                          | dropdown<br><table border="1"> <tr><td>1</td><td>less than \$30,000</td></tr> <tr><td>2</td><td>\$30,000-49,999</td></tr> <tr><td>3</td><td>\$50,000-74,999</td></tr> <tr><td>4</td><td>\$75,000-99,999</td></tr> <tr><td>5</td><td>\$100,000-149,999</td></tr> <tr><td>6</td><td>\$150,000-199,999</td></tr> <tr><td>7</td><td>\$200,000-249,999</td></tr> <tr><td>8</td><td>\$250,000-299,999,</td></tr> <tr><td>9</td><td>greater than \$300,000</td></tr> </table> | 1 | less than \$30,000        | 2 | \$30,000-49,999        | 3 | \$50,000-74,999      | 4 | \$75,000-99,999               | 5 | \$100,000-149,999                | 6 | \$150,000-199,999 | 7 | \$200,000-249,999 | 8 | \$250,000-299,999, | 9 | greater than \$300,000 |
| 1  | less than \$30,000               |                                                        |                                                                                                                                                                                                                                                                                                                                                                                                                                                                        |   |                           |   |                        |   |                      |   |                               |   |                                  |   |                   |   |                   |   |                    |   |                        |
| 2  | \$30,000-49,999                  |                                                        |                                                                                                                                                                                                                                                                                                                                                                                                                                                                        |   |                           |   |                        |   |                      |   |                               |   |                                  |   |                   |   |                   |   |                    |   |                        |
| 3  | \$50,000-74,999                  |                                                        |                                                                                                                                                                                                                                                                                                                                                                                                                                                                        |   |                           |   |                        |   |                      |   |                               |   |                                  |   |                   |   |                   |   |                    |   |                        |
| 4  | \$75,000-99,999                  |                                                        |                                                                                                                                                                                                                                                                                                                                                                                                                                                                        |   |                           |   |                        |   |                      |   |                               |   |                                  |   |                   |   |                   |   |                    |   |                        |
| 5  | \$100,000-149,999                |                                                        |                                                                                                                                                                                                                                                                                                                                                                                                                                                                        |   |                           |   |                        |   |                      |   |                               |   |                                  |   |                   |   |                   |   |                    |   |                        |
| 6  | \$150,000-199,999                |                                                        |                                                                                                                                                                                                                                                                                                                                                                                                                                                                        |   |                           |   |                        |   |                      |   |                               |   |                                  |   |                   |   |                   |   |                    |   |                        |
| 7  | \$200,000-249,999                |                                                        |                                                                                                                                                                                                                                                                                                                                                                                                                                                                        |   |                           |   |                        |   |                      |   |                               |   |                                  |   |                   |   |                   |   |                    |   |                        |
| 8  | \$250,000-299,999,               |                                                        |                                                                                                                                                                                                                                                                                                                                                                                                                                                                        |   |                           |   |                        |   |                      |   |                               |   |                                  |   |                   |   |                   |   |                    |   |                        |
| 9  | greater than \$300,000           |                                                        |                                                                                                                                                                                                                                                                                                                                                                                                                                                                        |   |                           |   |                        |   |                      |   |                               |   |                                  |   |                   |   |                   |   |                    |   |                        |
| 13 | zip_code                         | Zip code at primary residence:                         | text (zipcode)<br>Question number: 7                                                                                                                                                                                                                                                                                                                                                                                                                                   |   |                           |   |                        |   |                      |   |                               |   |                                  |   |                   |   |                   |   |                    |   |                        |

|    |                                                                            |                                                                                                                                    |                                                                                                                                                                                                                                                                                                                                                                                                                                                                                                                                                                                                                                                                                                                                                                                                                                                                                                                                                                                                                 |   |                     |               |    |                     |          |   |                     |                     |   |                     |                      |   |                     |         |   |                     |           |   |                     |                         |   |                     |                     |   |                     |                              |    |                      |                                                                                       |    |                      |                                                                                        |    |             |                   |
|----|----------------------------------------------------------------------------|------------------------------------------------------------------------------------------------------------------------------------|-----------------------------------------------------------------------------------------------------------------------------------------------------------------------------------------------------------------------------------------------------------------------------------------------------------------------------------------------------------------------------------------------------------------------------------------------------------------------------------------------------------------------------------------------------------------------------------------------------------------------------------------------------------------------------------------------------------------------------------------------------------------------------------------------------------------------------------------------------------------------------------------------------------------------------------------------------------------------------------------------------------------|---|---------------------|---------------|----|---------------------|----------|---|---------------------|---------------------|---|---------------------|----------------------|---|---------------------|---------|---|---------------------|-----------|---|---------------------|-------------------------|---|---------------------|---------------------|---|---------------------|------------------------------|----|----------------------|---------------------------------------------------------------------------------------|----|----------------------|----------------------------------------------------------------------------------------|----|-------------|-------------------|
| 14 | languages_spoken                                                           | Languages spoken (may choose more than one):                                                                                       | checkbox<br><table border="1"> <tr><td>1</td><td>languages_spoken__1</td><td>English</td></tr> <tr><td>2</td><td>languages_spoken__2</td><td>Spanish</td></tr> <tr><td>3</td><td>languages_spoken__3</td><td>Mandarin</td></tr> <tr><td>4</td><td>languages_spoken__4</td><td>Cantonese</td></tr> <tr><td>5</td><td>languages_spoken__5</td><td>Korean</td></tr> <tr><td>6</td><td>languages_spoken__6</td><td>Hindi</td></tr> <tr><td>7</td><td>languages_spoken__7</td><td>Punjabi</td></tr> <tr><td>8</td><td>languages_spoken__8</td><td>Bengali</td></tr> <tr><td>9</td><td>languages_spoken__9</td><td>Russian</td></tr> <tr><td>10</td><td>languages_spoken__10</td><td>French/Creole</td></tr> <tr><td>11</td><td>languages_spoken__11</td><td>Other</td></tr> </table> Question number: 8                                                                                                                                                                                                              | 1 | languages_spoken__1 | English       | 2  | languages_spoken__2 | Spanish  | 3 | languages_spoken__3 | Mandarin            | 4 | languages_spoken__4 | Cantonese            | 5 | languages_spoken__5 | Korean  | 6 | languages_spoken__6 | Hindi     | 7 | languages_spoken__7 | Punjabi                 | 8 | languages_spoken__8 | Bengali             | 9 | languages_spoken__9 | Russian                      | 10 | languages_spoken__10 | French/Creole                                                                         | 11 | languages_spoken__11 | Other                                                                                  |    |             |                   |
| 1  | languages_spoken__1                                                        | English                                                                                                                            |                                                                                                                                                                                                                                                                                                                                                                                                                                                                                                                                                                                                                                                                                                                                                                                                                                                                                                                                                                                                                 |   |                     |               |    |                     |          |   |                     |                     |   |                     |                      |   |                     |         |   |                     |           |   |                     |                         |   |                     |                     |   |                     |                              |    |                      |                                                                                       |    |                      |                                                                                        |    |             |                   |
| 2  | languages_spoken__2                                                        | Spanish                                                                                                                            |                                                                                                                                                                                                                                                                                                                                                                                                                                                                                                                                                                                                                                                                                                                                                                                                                                                                                                                                                                                                                 |   |                     |               |    |                     |          |   |                     |                     |   |                     |                      |   |                     |         |   |                     |           |   |                     |                         |   |                     |                     |   |                     |                              |    |                      |                                                                                       |    |                      |                                                                                        |    |             |                   |
| 3  | languages_spoken__3                                                        | Mandarin                                                                                                                           |                                                                                                                                                                                                                                                                                                                                                                                                                                                                                                                                                                                                                                                                                                                                                                                                                                                                                                                                                                                                                 |   |                     |               |    |                     |          |   |                     |                     |   |                     |                      |   |                     |         |   |                     |           |   |                     |                         |   |                     |                     |   |                     |                              |    |                      |                                                                                       |    |                      |                                                                                        |    |             |                   |
| 4  | languages_spoken__4                                                        | Cantonese                                                                                                                          |                                                                                                                                                                                                                                                                                                                                                                                                                                                                                                                                                                                                                                                                                                                                                                                                                                                                                                                                                                                                                 |   |                     |               |    |                     |          |   |                     |                     |   |                     |                      |   |                     |         |   |                     |           |   |                     |                         |   |                     |                     |   |                     |                              |    |                      |                                                                                       |    |                      |                                                                                        |    |             |                   |
| 5  | languages_spoken__5                                                        | Korean                                                                                                                             |                                                                                                                                                                                                                                                                                                                                                                                                                                                                                                                                                                                                                                                                                                                                                                                                                                                                                                                                                                                                                 |   |                     |               |    |                     |          |   |                     |                     |   |                     |                      |   |                     |         |   |                     |           |   |                     |                         |   |                     |                     |   |                     |                              |    |                      |                                                                                       |    |                      |                                                                                        |    |             |                   |
| 6  | languages_spoken__6                                                        | Hindi                                                                                                                              |                                                                                                                                                                                                                                                                                                                                                                                                                                                                                                                                                                                                                                                                                                                                                                                                                                                                                                                                                                                                                 |   |                     |               |    |                     |          |   |                     |                     |   |                     |                      |   |                     |         |   |                     |           |   |                     |                         |   |                     |                     |   |                     |                              |    |                      |                                                                                       |    |                      |                                                                                        |    |             |                   |
| 7  | languages_spoken__7                                                        | Punjabi                                                                                                                            |                                                                                                                                                                                                                                                                                                                                                                                                                                                                                                                                                                                                                                                                                                                                                                                                                                                                                                                                                                                                                 |   |                     |               |    |                     |          |   |                     |                     |   |                     |                      |   |                     |         |   |                     |           |   |                     |                         |   |                     |                     |   |                     |                              |    |                      |                                                                                       |    |                      |                                                                                        |    |             |                   |
| 8  | languages_spoken__8                                                        | Bengali                                                                                                                            |                                                                                                                                                                                                                                                                                                                                                                                                                                                                                                                                                                                                                                                                                                                                                                                                                                                                                                                                                                                                                 |   |                     |               |    |                     |          |   |                     |                     |   |                     |                      |   |                     |         |   |                     |           |   |                     |                         |   |                     |                     |   |                     |                              |    |                      |                                                                                       |    |                      |                                                                                        |    |             |                   |
| 9  | languages_spoken__9                                                        | Russian                                                                                                                            |                                                                                                                                                                                                                                                                                                                                                                                                                                                                                                                                                                                                                                                                                                                                                                                                                                                                                                                                                                                                                 |   |                     |               |    |                     |          |   |                     |                     |   |                     |                      |   |                     |         |   |                     |           |   |                     |                         |   |                     |                     |   |                     |                              |    |                      |                                                                                       |    |                      |                                                                                        |    |             |                   |
| 10 | languages_spoken__10                                                       | French/Creole                                                                                                                      |                                                                                                                                                                                                                                                                                                                                                                                                                                                                                                                                                                                                                                                                                                                                                                                                                                                                                                                                                                                                                 |   |                     |               |    |                     |          |   |                     |                     |   |                     |                      |   |                     |         |   |                     |           |   |                     |                         |   |                     |                     |   |                     |                              |    |                      |                                                                                       |    |                      |                                                                                        |    |             |                   |
| 11 | languages_spoken__11                                                       | Other                                                                                                                              |                                                                                                                                                                                                                                                                                                                                                                                                                                                                                                                                                                                                                                                                                                                                                                                                                                                                                                                                                                                                                 |   |                     |               |    |                     |          |   |                     |                     |   |                     |                      |   |                     |         |   |                     |           |   |                     |                         |   |                     |                     |   |                     |                              |    |                      |                                                                                       |    |                      |                                                                                        |    |             |                   |
| 15 | languages_other<br>Show the field ONLY if:<br>[languages_spoken(11)] = '1' | If other, which language?                                                                                                          | text (alpha_only)<br>Question number: 9                                                                                                                                                                                                                                                                                                                                                                                                                                                                                                                                                                                                                                                                                                                                                                                                                                                                                                                                                                         |   |                     |               |    |                     |          |   |                     |                     |   |                     |                      |   |                     |         |   |                     |           |   |                     |                         |   |                     |                     |   |                     |                              |    |                      |                                                                                       |    |                      |                                                                                        |    |             |                   |
| 16 | immunocompromised                                                          | Do you have a compromised immune system? (therefore eligible for a third dose of COVID-19 vaccine 28 days after your second dose?) | yesno<br><table border="1"> <tr><td>1</td><td>Yes</td></tr> <tr><td>0</td><td>No</td></tr> </table> Question number: 10<br>Stop actions on 1                                                                                                                                                                                                                                                                                                                                                                                                                                                                                                                                                                                                                                                                                                                                                                                                                                                                    | 1 | Yes                 | 0             | No |                     |          |   |                     |                     |   |                     |                      |   |                     |         |   |                     |           |   |                     |                         |   |                     |                     |   |                     |                              |    |                      |                                                                                       |    |                      |                                                                                        |    |             |                   |
| 1  | Yes                                                                        |                                                                                                                                    |                                                                                                                                                                                                                                                                                                                                                                                                                                                                                                                                                                                                                                                                                                                                                                                                                                                                                                                                                                                                                 |   |                     |               |    |                     |          |   |                     |                     |   |                     |                      |   |                     |         |   |                     |           |   |                     |                         |   |                     |                     |   |                     |                              |    |                      |                                                                                       |    |                      |                                                                                        |    |             |                   |
| 0  | No                                                                         |                                                                                                                                    |                                                                                                                                                                                                                                                                                                                                                                                                                                                                                                                                                                                                                                                                                                                                                                                                                                                                                                                                                                                                                 |   |                     |               |    |                     |          |   |                     |                     |   |                     |                      |   |                     |         |   |                     |           |   |                     |                         |   |                     |                     |   |                     |                              |    |                      |                                                                                       |    |                      |                                                                                        |    |             |                   |
| 17 | chronic                                                                    | Please check all the medical conditions that apply to you.                                                                         | checkbox<br><table border="1"> <tr><td>1</td><td>chronic__1</td><td>Heart disease</td></tr> <tr><td>2</td><td>chronic__2</td><td>Diabetes</td></tr> <tr><td>3</td><td>chronic__3</td><td>High blood pressure</td></tr> <tr><td>4</td><td>chronic__4</td><td>Chronic lung disease</td></tr> <tr><td>5</td><td>chronic__5</td><td>Obesity</td></tr> <tr><td>6</td><td>chronic__6</td><td>Pregnancy</td></tr> <tr><td>7</td><td>chronic__7</td><td>Chronic kidney disease,</td></tr> <tr><td>8</td><td>chronic__8</td><td>Sickle cell disease</td></tr> <tr><td>9</td><td>chronic__9</td><td>Neurodevelopmental disorders</td></tr> <tr><td>10</td><td>chronic__10</td><td>Medically complex (eg. cerebral palsy, genetic syndrome, severe congenital anomalies)</td></tr> <tr><td>11</td><td>chronic__11</td><td>Use medical technology such as g-tube, tracheostomy, ventilation machines such as CPAP</td></tr> <tr><td>12</td><td>chronic__12</td><td>None of the above</td></tr> </table> Question number: 11 | 1 | chronic__1          | Heart disease | 2  | chronic__2          | Diabetes | 3 | chronic__3          | High blood pressure | 4 | chronic__4          | Chronic lung disease | 5 | chronic__5          | Obesity | 6 | chronic__6          | Pregnancy | 7 | chronic__7          | Chronic kidney disease, | 8 | chronic__8          | Sickle cell disease | 9 | chronic__9          | Neurodevelopmental disorders | 10 | chronic__10          | Medically complex (eg. cerebral palsy, genetic syndrome, severe congenital anomalies) | 11 | chronic__11          | Use medical technology such as g-tube, tracheostomy, ventilation machines such as CPAP | 12 | chronic__12 | None of the above |
| 1  | chronic__1                                                                 | Heart disease                                                                                                                      |                                                                                                                                                                                                                                                                                                                                                                                                                                                                                                                                                                                                                                                                                                                                                                                                                                                                                                                                                                                                                 |   |                     |               |    |                     |          |   |                     |                     |   |                     |                      |   |                     |         |   |                     |           |   |                     |                         |   |                     |                     |   |                     |                              |    |                      |                                                                                       |    |                      |                                                                                        |    |             |                   |
| 2  | chronic__2                                                                 | Diabetes                                                                                                                           |                                                                                                                                                                                                                                                                                                                                                                                                                                                                                                                                                                                                                                                                                                                                                                                                                                                                                                                                                                                                                 |   |                     |               |    |                     |          |   |                     |                     |   |                     |                      |   |                     |         |   |                     |           |   |                     |                         |   |                     |                     |   |                     |                              |    |                      |                                                                                       |    |                      |                                                                                        |    |             |                   |
| 3  | chronic__3                                                                 | High blood pressure                                                                                                                |                                                                                                                                                                                                                                                                                                                                                                                                                                                                                                                                                                                                                                                                                                                                                                                                                                                                                                                                                                                                                 |   |                     |               |    |                     |          |   |                     |                     |   |                     |                      |   |                     |         |   |                     |           |   |                     |                         |   |                     |                     |   |                     |                              |    |                      |                                                                                       |    |                      |                                                                                        |    |             |                   |
| 4  | chronic__4                                                                 | Chronic lung disease                                                                                                               |                                                                                                                                                                                                                                                                                                                                                                                                                                                                                                                                                                                                                                                                                                                                                                                                                                                                                                                                                                                                                 |   |                     |               |    |                     |          |   |                     |                     |   |                     |                      |   |                     |         |   |                     |           |   |                     |                         |   |                     |                     |   |                     |                              |    |                      |                                                                                       |    |                      |                                                                                        |    |             |                   |
| 5  | chronic__5                                                                 | Obesity                                                                                                                            |                                                                                                                                                                                                                                                                                                                                                                                                                                                                                                                                                                                                                                                                                                                                                                                                                                                                                                                                                                                                                 |   |                     |               |    |                     |          |   |                     |                     |   |                     |                      |   |                     |         |   |                     |           |   |                     |                         |   |                     |                     |   |                     |                              |    |                      |                                                                                       |    |                      |                                                                                        |    |             |                   |
| 6  | chronic__6                                                                 | Pregnancy                                                                                                                          |                                                                                                                                                                                                                                                                                                                                                                                                                                                                                                                                                                                                                                                                                                                                                                                                                                                                                                                                                                                                                 |   |                     |               |    |                     |          |   |                     |                     |   |                     |                      |   |                     |         |   |                     |           |   |                     |                         |   |                     |                     |   |                     |                              |    |                      |                                                                                       |    |                      |                                                                                        |    |             |                   |
| 7  | chronic__7                                                                 | Chronic kidney disease,                                                                                                            |                                                                                                                                                                                                                                                                                                                                                                                                                                                                                                                                                                                                                                                                                                                                                                                                                                                                                                                                                                                                                 |   |                     |               |    |                     |          |   |                     |                     |   |                     |                      |   |                     |         |   |                     |           |   |                     |                         |   |                     |                     |   |                     |                              |    |                      |                                                                                       |    |                      |                                                                                        |    |             |                   |
| 8  | chronic__8                                                                 | Sickle cell disease                                                                                                                |                                                                                                                                                                                                                                                                                                                                                                                                                                                                                                                                                                                                                                                                                                                                                                                                                                                                                                                                                                                                                 |   |                     |               |    |                     |          |   |                     |                     |   |                     |                      |   |                     |         |   |                     |           |   |                     |                         |   |                     |                     |   |                     |                              |    |                      |                                                                                       |    |                      |                                                                                        |    |             |                   |
| 9  | chronic__9                                                                 | Neurodevelopmental disorders                                                                                                       |                                                                                                                                                                                                                                                                                                                                                                                                                                                                                                                                                                                                                                                                                                                                                                                                                                                                                                                                                                                                                 |   |                     |               |    |                     |          |   |                     |                     |   |                     |                      |   |                     |         |   |                     |           |   |                     |                         |   |                     |                     |   |                     |                              |    |                      |                                                                                       |    |                      |                                                                                        |    |             |                   |
| 10 | chronic__10                                                                | Medically complex (eg. cerebral palsy, genetic syndrome, severe congenital anomalies)                                              |                                                                                                                                                                                                                                                                                                                                                                                                                                                                                                                                                                                                                                                                                                                                                                                                                                                                                                                                                                                                                 |   |                     |               |    |                     |          |   |                     |                     |   |                     |                      |   |                     |         |   |                     |           |   |                     |                         |   |                     |                     |   |                     |                              |    |                      |                                                                                       |    |                      |                                                                                        |    |             |                   |
| 11 | chronic__11                                                                | Use medical technology such as g-tube, tracheostomy, ventilation machines such as CPAP                                             |                                                                                                                                                                                                                                                                                                                                                                                                                                                                                                                                                                                                                                                                                                                                                                                                                                                                                                                                                                                                                 |   |                     |               |    |                     |          |   |                     |                     |   |                     |                      |   |                     |         |   |                     |           |   |                     |                         |   |                     |                     |   |                     |                              |    |                      |                                                                                       |    |                      |                                                                                        |    |             |                   |
| 12 | chronic__12                                                                | None of the above                                                                                                                  |                                                                                                                                                                                                                                                                                                                                                                                                                                                                                                                                                                                                                                                                                                                                                                                                                                                                                                                                                                                                                 |   |                     |               |    |                     |          |   |                     |                     |   |                     |                      |   |                     |         |   |                     |           |   |                     |                         |   |                     |                     |   |                     |                              |    |                      |                                                                                       |    |                      |                                                                                        |    |             |                   |

|    |                                                                           |                                                                                                                                                                                                             |                                                                                                                                                                                                                                                                                                                                                                                                                                                                                                                                                                                                                                                                                                                                         |   |               |   |              |   |               |   |            |   |            |   |          |   |           |   |           |   |             |    |                |    |              |    |               |    |               |    |              |    |                                       |
|----|---------------------------------------------------------------------------|-------------------------------------------------------------------------------------------------------------------------------------------------------------------------------------------------------------|-----------------------------------------------------------------------------------------------------------------------------------------------------------------------------------------------------------------------------------------------------------------------------------------------------------------------------------------------------------------------------------------------------------------------------------------------------------------------------------------------------------------------------------------------------------------------------------------------------------------------------------------------------------------------------------------------------------------------------------------|---|---------------|---|--------------|---|---------------|---|------------|---|------------|---|----------|---|-----------|---|-----------|---|-------------|----|----------------|----|--------------|----|---------------|----|---------------|----|--------------|----|---------------------------------------|
| 18 | covid19vaccinemonth                                                       | When did you receive your first COVID-19 vaccine?                                                                                                                                                           | <p>dropdown</p> <table border="1"> <tr><td>1</td><td>December 2020</td></tr> <tr><td>2</td><td>January 2021</td></tr> <tr><td>3</td><td>February 2021</td></tr> <tr><td>4</td><td>March 2021</td></tr> <tr><td>5</td><td>April 2021</td></tr> <tr><td>6</td><td>May 2021</td></tr> <tr><td>7</td><td>June 2021</td></tr> <tr><td>8</td><td>July 2021</td></tr> <tr><td>9</td><td>August 2021</td></tr> <tr><td>10</td><td>September 2021</td></tr> <tr><td>11</td><td>October 2021</td></tr> <tr><td>12</td><td>November 2021</td></tr> <tr><td>13</td><td>December 2021</td></tr> <tr><td>14</td><td>January 2022</td></tr> </table> <p>Question number: 12</p>                                                                        | 1 | December 2020 | 2 | January 2021 | 3 | February 2021 | 4 | March 2021 | 5 | April 2021 | 6 | May 2021 | 7 | June 2021 | 8 | July 2021 | 9 | August 2021 | 10 | September 2021 | 11 | October 2021 | 12 | November 2021 | 13 | December 2021 | 14 | January 2022 |    |                                       |
| 1  | December 2020                                                             |                                                                                                                                                                                                             |                                                                                                                                                                                                                                                                                                                                                                                                                                                                                                                                                                                                                                                                                                                                         |   |               |   |              |   |               |   |            |   |            |   |          |   |           |   |           |   |             |    |                |    |              |    |               |    |               |    |              |    |                                       |
| 2  | January 2021                                                              |                                                                                                                                                                                                             |                                                                                                                                                                                                                                                                                                                                                                                                                                                                                                                                                                                                                                                                                                                                         |   |               |   |              |   |               |   |            |   |            |   |          |   |           |   |           |   |             |    |                |    |              |    |               |    |               |    |              |    |                                       |
| 3  | February 2021                                                             |                                                                                                                                                                                                             |                                                                                                                                                                                                                                                                                                                                                                                                                                                                                                                                                                                                                                                                                                                                         |   |               |   |              |   |               |   |            |   |            |   |          |   |           |   |           |   |             |    |                |    |              |    |               |    |               |    |              |    |                                       |
| 4  | March 2021                                                                |                                                                                                                                                                                                             |                                                                                                                                                                                                                                                                                                                                                                                                                                                                                                                                                                                                                                                                                                                                         |   |               |   |              |   |               |   |            |   |            |   |          |   |           |   |           |   |             |    |                |    |              |    |               |    |               |    |              |    |                                       |
| 5  | April 2021                                                                |                                                                                                                                                                                                             |                                                                                                                                                                                                                                                                                                                                                                                                                                                                                                                                                                                                                                                                                                                                         |   |               |   |              |   |               |   |            |   |            |   |          |   |           |   |           |   |             |    |                |    |              |    |               |    |               |    |              |    |                                       |
| 6  | May 2021                                                                  |                                                                                                                                                                                                             |                                                                                                                                                                                                                                                                                                                                                                                                                                                                                                                                                                                                                                                                                                                                         |   |               |   |              |   |               |   |            |   |            |   |          |   |           |   |           |   |             |    |                |    |              |    |               |    |               |    |              |    |                                       |
| 7  | June 2021                                                                 |                                                                                                                                                                                                             |                                                                                                                                                                                                                                                                                                                                                                                                                                                                                                                                                                                                                                                                                                                                         |   |               |   |              |   |               |   |            |   |            |   |          |   |           |   |           |   |             |    |                |    |              |    |               |    |               |    |              |    |                                       |
| 8  | July 2021                                                                 |                                                                                                                                                                                                             |                                                                                                                                                                                                                                                                                                                                                                                                                                                                                                                                                                                                                                                                                                                                         |   |               |   |              |   |               |   |            |   |            |   |          |   |           |   |           |   |             |    |                |    |              |    |               |    |               |    |              |    |                                       |
| 9  | August 2021                                                               |                                                                                                                                                                                                             |                                                                                                                                                                                                                                                                                                                                                                                                                                                                                                                                                                                                                                                                                                                                         |   |               |   |              |   |               |   |            |   |            |   |          |   |           |   |           |   |             |    |                |    |              |    |               |    |               |    |              |    |                                       |
| 10 | September 2021                                                            |                                                                                                                                                                                                             |                                                                                                                                                                                                                                                                                                                                                                                                                                                                                                                                                                                                                                                                                                                                         |   |               |   |              |   |               |   |            |   |            |   |          |   |           |   |           |   |             |    |                |    |              |    |               |    |               |    |              |    |                                       |
| 11 | October 2021                                                              |                                                                                                                                                                                                             |                                                                                                                                                                                                                                                                                                                                                                                                                                                                                                                                                                                                                                                                                                                                         |   |               |   |              |   |               |   |            |   |            |   |          |   |           |   |           |   |             |    |                |    |              |    |               |    |               |    |              |    |                                       |
| 12 | November 2021                                                             |                                                                                                                                                                                                             |                                                                                                                                                                                                                                                                                                                                                                                                                                                                                                                                                                                                                                                                                                                                         |   |               |   |              |   |               |   |            |   |            |   |          |   |           |   |           |   |             |    |                |    |              |    |               |    |               |    |              |    |                                       |
| 13 | December 2021                                                             |                                                                                                                                                                                                             |                                                                                                                                                                                                                                                                                                                                                                                                                                                                                                                                                                                                                                                                                                                                         |   |               |   |              |   |               |   |            |   |            |   |          |   |           |   |           |   |             |    |                |    |              |    |               |    |               |    |              |    |                                       |
| 14 | January 2022                                                              |                                                                                                                                                                                                             |                                                                                                                                                                                                                                                                                                                                                                                                                                                                                                                                                                                                                                                                                                                                         |   |               |   |              |   |               |   |            |   |            |   |          |   |           |   |           |   |             |    |                |    |              |    |               |    |               |    |              |    |                                       |
| 19 | covid19vaccinemonth_2                                                     | When did you receive your second COVID-19 vaccine?                                                                                                                                                          | <p>dropdown</p> <table border="1"> <tr><td>1</td><td>December 2020</td></tr> <tr><td>2</td><td>January 2021</td></tr> <tr><td>3</td><td>February 2021</td></tr> <tr><td>4</td><td>March 2021</td></tr> <tr><td>5</td><td>April 2021</td></tr> <tr><td>6</td><td>May 2021</td></tr> <tr><td>7</td><td>June 2021</td></tr> <tr><td>8</td><td>July 2021</td></tr> <tr><td>9</td><td>August 2021</td></tr> <tr><td>10</td><td>September 2021</td></tr> <tr><td>11</td><td>October 2021</td></tr> <tr><td>12</td><td>November 2021</td></tr> <tr><td>13</td><td>December 2021</td></tr> <tr><td>14</td><td>January 2022</td></tr> <tr><td>15</td><td>Not applicable (received J&amp;J vaccine)</td></tr> </table> <p>Question number: 13</p> | 1 | December 2020 | 2 | January 2021 | 3 | February 2021 | 4 | March 2021 | 5 | April 2021 | 6 | May 2021 | 7 | June 2021 | 8 | July 2021 | 9 | August 2021 | 10 | September 2021 | 11 | October 2021 | 12 | November 2021 | 13 | December 2021 | 14 | January 2022 | 15 | Not applicable (received J&J vaccine) |
| 1  | December 2020                                                             |                                                                                                                                                                                                             |                                                                                                                                                                                                                                                                                                                                                                                                                                                                                                                                                                                                                                                                                                                                         |   |               |   |              |   |               |   |            |   |            |   |          |   |           |   |           |   |             |    |                |    |              |    |               |    |               |    |              |    |                                       |
| 2  | January 2021                                                              |                                                                                                                                                                                                             |                                                                                                                                                                                                                                                                                                                                                                                                                                                                                                                                                                                                                                                                                                                                         |   |               |   |              |   |               |   |            |   |            |   |          |   |           |   |           |   |             |    |                |    |              |    |               |    |               |    |              |    |                                       |
| 3  | February 2021                                                             |                                                                                                                                                                                                             |                                                                                                                                                                                                                                                                                                                                                                                                                                                                                                                                                                                                                                                                                                                                         |   |               |   |              |   |               |   |            |   |            |   |          |   |           |   |           |   |             |    |                |    |              |    |               |    |               |    |              |    |                                       |
| 4  | March 2021                                                                |                                                                                                                                                                                                             |                                                                                                                                                                                                                                                                                                                                                                                                                                                                                                                                                                                                                                                                                                                                         |   |               |   |              |   |               |   |            |   |            |   |          |   |           |   |           |   |             |    |                |    |              |    |               |    |               |    |              |    |                                       |
| 5  | April 2021                                                                |                                                                                                                                                                                                             |                                                                                                                                                                                                                                                                                                                                                                                                                                                                                                                                                                                                                                                                                                                                         |   |               |   |              |   |               |   |            |   |            |   |          |   |           |   |           |   |             |    |                |    |              |    |               |    |               |    |              |    |                                       |
| 6  | May 2021                                                                  |                                                                                                                                                                                                             |                                                                                                                                                                                                                                                                                                                                                                                                                                                                                                                                                                                                                                                                                                                                         |   |               |   |              |   |               |   |            |   |            |   |          |   |           |   |           |   |             |    |                |    |              |    |               |    |               |    |              |    |                                       |
| 7  | June 2021                                                                 |                                                                                                                                                                                                             |                                                                                                                                                                                                                                                                                                                                                                                                                                                                                                                                                                                                                                                                                                                                         |   |               |   |              |   |               |   |            |   |            |   |          |   |           |   |           |   |             |    |                |    |              |    |               |    |               |    |              |    |                                       |
| 8  | July 2021                                                                 |                                                                                                                                                                                                             |                                                                                                                                                                                                                                                                                                                                                                                                                                                                                                                                                                                                                                                                                                                                         |   |               |   |              |   |               |   |            |   |            |   |          |   |           |   |           |   |             |    |                |    |              |    |               |    |               |    |              |    |                                       |
| 9  | August 2021                                                               |                                                                                                                                                                                                             |                                                                                                                                                                                                                                                                                                                                                                                                                                                                                                                                                                                                                                                                                                                                         |   |               |   |              |   |               |   |            |   |            |   |          |   |           |   |           |   |             |    |                |    |              |    |               |    |               |    |              |    |                                       |
| 10 | September 2021                                                            |                                                                                                                                                                                                             |                                                                                                                                                                                                                                                                                                                                                                                                                                                                                                                                                                                                                                                                                                                                         |   |               |   |              |   |               |   |            |   |            |   |          |   |           |   |           |   |             |    |                |    |              |    |               |    |               |    |              |    |                                       |
| 11 | October 2021                                                              |                                                                                                                                                                                                             |                                                                                                                                                                                                                                                                                                                                                                                                                                                                                                                                                                                                                                                                                                                                         |   |               |   |              |   |               |   |            |   |            |   |          |   |           |   |           |   |             |    |                |    |              |    |               |    |               |    |              |    |                                       |
| 12 | November 2021                                                             |                                                                                                                                                                                                             |                                                                                                                                                                                                                                                                                                                                                                                                                                                                                                                                                                                                                                                                                                                                         |   |               |   |              |   |               |   |            |   |            |   |          |   |           |   |           |   |             |    |                |    |              |    |               |    |               |    |              |    |                                       |
| 13 | December 2021                                                             |                                                                                                                                                                                                             |                                                                                                                                                                                                                                                                                                                                                                                                                                                                                                                                                                                                                                                                                                                                         |   |               |   |              |   |               |   |            |   |            |   |          |   |           |   |           |   |             |    |                |    |              |    |               |    |               |    |              |    |                                       |
| 14 | January 2022                                                              |                                                                                                                                                                                                             |                                                                                                                                                                                                                                                                                                                                                                                                                                                                                                                                                                                                                                                                                                                                         |   |               |   |              |   |               |   |            |   |            |   |          |   |           |   |           |   |             |    |                |    |              |    |               |    |               |    |              |    |                                       |
| 15 | Not applicable (received J&J vaccine)                                     |                                                                                                                                                                                                             |                                                                                                                                                                                                                                                                                                                                                                                                                                                                                                                                                                                                                                                                                                                                         |   |               |   |              |   |               |   |            |   |            |   |          |   |           |   |           |   |             |    |                |    |              |    |               |    |               |    |              |    |                                       |
| 20 | covid19vaccine6months                                                     | Has it been least six months since your received the COVID-19 vaccine series (PfizerBioNTech or Moderna mRNA vaccine) or two months after a single dose (Johnson & Johnson/Janssen)?                        | <p>yesno</p> <table border="1"> <tr><td>1</td><td>Yes</td></tr> <tr><td>0</td><td>No</td></tr> </table>                                                                                                                                                                                                                                                                                                                                                                                                                                                                                                                                                                                                                                 | 1 | Yes           | 0 | No           |   |               |   |            |   |            |   |          |   |           |   |           |   |             |    |                |    |              |    |               |    |               |    |              |    |                                       |
| 1  | Yes                                                                       |                                                                                                                                                                                                             |                                                                                                                                                                                                                                                                                                                                                                                                                                                                                                                                                                                                                                                                                                                                         |   |               |   |              |   |               |   |            |   |            |   |          |   |           |   |           |   |             |    |                |    |              |    |               |    |               |    |              |    |                                       |
| 0  | No                                                                        |                                                                                                                                                                                                             |                                                                                                                                                                                                                                                                                                                                                                                                                                                                                                                                                                                                                                                                                                                                         |   |               |   |              |   |               |   |            |   |            |   |          |   |           |   |           |   |             |    |                |    |              |    |               |    |               |    |              |    |                                       |
| 21 | boostersched<br>Show the field ONLY if:<br>[covid19vaccine6months] = '1'  | Are you scheduled to get or already got a COVID-19 vaccine booster dose?                                                                                                                                    | <p>yesno</p> <table border="1"> <tr><td>1</td><td>Yes</td></tr> <tr><td>0</td><td>No</td></tr> </table>                                                                                                                                                                                                                                                                                                                                                                                                                                                                                                                                                                                                                                 | 1 | Yes           | 0 | No           |   |               |   |            |   |            |   |          |   |           |   |           |   |             |    |                |    |              |    |               |    |               |    |              |    |                                       |
| 1  | Yes                                                                       |                                                                                                                                                                                                             |                                                                                                                                                                                                                                                                                                                                                                                                                                                                                                                                                                                                                                                                                                                                         |   |               |   |              |   |               |   |            |   |            |   |          |   |           |   |           |   |             |    |                |    |              |    |               |    |               |    |              |    |                                       |
| 0  | No                                                                        |                                                                                                                                                                                                             |                                                                                                                                                                                                                                                                                                                                                                                                                                                                                                                                                                                                                                                                                                                                         |   |               |   |              |   |               |   |            |   |            |   |          |   |           |   |           |   |             |    |                |    |              |    |               |    |               |    |              |    |                                       |
| 22 | boosterrecent<br>Show the field ONLY if:<br>[covid19vaccine6months] = '0' | Is your most recent vaccination a COVID-19 booster dose?                                                                                                                                                    | <p>yesno</p> <table border="1"> <tr><td>1</td><td>Yes</td></tr> <tr><td>0</td><td>No</td></tr> </table>                                                                                                                                                                                                                                                                                                                                                                                                                                                                                                                                                                                                                                 | 1 | Yes           | 0 | No           |   |               |   |            |   |            |   |          |   |           |   |           |   |             |    |                |    |              |    |               |    |               |    |              |    |                                       |
| 1  | Yes                                                                       |                                                                                                                                                                                                             |                                                                                                                                                                                                                                                                                                                                                                                                                                                                                                                                                                                                                                                                                                                                         |   |               |   |              |   |               |   |            |   |            |   |          |   |           |   |           |   |             |    |                |    |              |    |               |    |               |    |              |    |                                       |
| 0  | No                                                                        |                                                                                                                                                                                                             |                                                                                                                                                                                                                                                                                                                                                                                                                                                                                                                                                                                                                                                                                                                                         |   |               |   |              |   |               |   |            |   |            |   |          |   |           |   |           |   |             |    |                |    |              |    |               |    |               |    |              |    |                                       |
| 23 | boosterreceived                                                           | When it was allowed (at least six months after the Pfizer-BioNTech or Moderna mRNA vaccine series or two months after a single dose Johnson & Johnson/Janssen), did you receive a COVID-19 booster vaccine? | <p>yesno</p> <table border="1"> <tr><td>1</td><td>Yes</td></tr> <tr><td>0</td><td>No</td></tr> </table>                                                                                                                                                                                                                                                                                                                                                                                                                                                                                                                                                                                                                                 | 1 | Yes           | 0 | No           |   |               |   |            |   |            |   |          |   |           |   |           |   |             |    |                |    |              |    |               |    |               |    |              |    |                                       |
| 1  | Yes                                                                       |                                                                                                                                                                                                             |                                                                                                                                                                                                                                                                                                                                                                                                                                                                                                                                                                                                                                                                                                                                         |   |               |   |              |   |               |   |            |   |            |   |          |   |           |   |           |   |             |    |                |    |              |    |               |    |               |    |              |    |                                       |
| 0  | No                                                                        |                                                                                                                                                                                                             |                                                                                                                                                                                                                                                                                                                                                                                                                                                                                                                                                                                                                                                                                                                                         |   |               |   |              |   |               |   |            |   |            |   |          |   |           |   |           |   |             |    |                |    |              |    |               |    |               |    |              |    |                                       |

|    |                                                                                                                                                                 |                                                                                          |                                                                                                                                                                                                                                                          |   |                       |   |                |   |                 |   |                           |   |   |
|----|-----------------------------------------------------------------------------------------------------------------------------------------------------------------|------------------------------------------------------------------------------------------|----------------------------------------------------------------------------------------------------------------------------------------------------------------------------------------------------------------------------------------------------------|---|-----------------------|---|----------------|---|-----------------|---|---------------------------|---|---|
| 24 | parentguardian                                                                                                                                                  | Are you a parent or guardian of a child 17 years old or younger?                         | yesno<br><table border="1"> <tr> <td>1</td> <td>Yes</td> </tr> <tr> <td>0</td> <td>No</td> </tr> </table>                                                                                                                                                | 1 | Yes                   | 0 | No             |   |                 |   |                           |   |   |
| 1  | Yes                                                                                                                                                             |                                                                                          |                                                                                                                                                                                                                                                          |   |                       |   |                |   |                 |   |                           |   |   |
| 0  | No                                                                                                                                                              |                                                                                          |                                                                                                                                                                                                                                                          |   |                       |   |                |   |                 |   |                           |   |   |
| 25 | numberchildren<br>Show the field ONLY if: [parentguardian] = '1'                                                                                                | How many children do you have?                                                           | dropdown<br><table border="1"> <tr> <td>1</td> <td>1</td> </tr> <tr> <td>2</td> <td>2</td> </tr> <tr> <td>3</td> <td>3</td> </tr> <tr> <td>4</td> <td>4</td> </tr> <tr> <td>5</td> <td>5</td> </tr> </table> <p>Question number: 20</p>                  | 1 | 1                     | 2 | 2              | 3 | 3               | 4 | 4                         | 5 | 5 |
| 1  | 1                                                                                                                                                               |                                                                                          |                                                                                                                                                                                                                                                          |   |                       |   |                |   |                 |   |                           |   |   |
| 2  | 2                                                                                                                                                               |                                                                                          |                                                                                                                                                                                                                                                          |   |                       |   |                |   |                 |   |                           |   |   |
| 3  | 3                                                                                                                                                               |                                                                                          |                                                                                                                                                                                                                                                          |   |                       |   |                |   |                 |   |                           |   |   |
| 4  | 4                                                                                                                                                               |                                                                                          |                                                                                                                                                                                                                                                          |   |                       |   |                |   |                 |   |                           |   |   |
| 5  | 5                                                                                                                                                               |                                                                                          |                                                                                                                                                                                                                                                          |   |                       |   |                |   |                 |   |                           |   |   |
| 26 | child_1<br>Show the field ONLY if: [numberchildren] = '1' or [numberchildren] = '2' or [numberchildren] = '3' or [numberchildren] = '4' or [numberchildren] = 5 | Section Header: <i>Please enter the following information for each child</i><br>Child 1  | radio (Matrix)<br><table border="1"> <tr> <td>1</td> <td>less than 5 years old</td> </tr> <tr> <td>2</td> <td>5-11 years old</td> </tr> <tr> <td>3</td> <td>12-17 years old</td> </tr> <tr> <td>4</td> <td>greater than 18 years old</td> </tr> </table> | 1 | less than 5 years old | 2 | 5-11 years old | 3 | 12-17 years old | 4 | greater than 18 years old |   |   |
| 1  | less than 5 years old                                                                                                                                           |                                                                                          |                                                                                                                                                                                                                                                          |   |                       |   |                |   |                 |   |                           |   |   |
| 2  | 5-11 years old                                                                                                                                                  |                                                                                          |                                                                                                                                                                                                                                                          |   |                       |   |                |   |                 |   |                           |   |   |
| 3  | 12-17 years old                                                                                                                                                 |                                                                                          |                                                                                                                                                                                                                                                          |   |                       |   |                |   |                 |   |                           |   |   |
| 4  | greater than 18 years old                                                                                                                                       |                                                                                          |                                                                                                                                                                                                                                                          |   |                       |   |                |   |                 |   |                           |   |   |
| 27 | child_2<br>Show the field ONLY if: [numberchildren] = '2' or [numberchildren] = '3' or [numberchildren] = '4' or [numberchildren] = 5                           | Child 2                                                                                  | radio (Matrix)<br><table border="1"> <tr> <td>1</td> <td>less than 5 years old</td> </tr> <tr> <td>2</td> <td>5-11 years old</td> </tr> <tr> <td>3</td> <td>12-17 years old</td> </tr> <tr> <td>4</td> <td>greater than 18 years old</td> </tr> </table> | 1 | less than 5 years old | 2 | 5-11 years old | 3 | 12-17 years old | 4 | greater than 18 years old |   |   |
| 1  | less than 5 years old                                                                                                                                           |                                                                                          |                                                                                                                                                                                                                                                          |   |                       |   |                |   |                 |   |                           |   |   |
| 2  | 5-11 years old                                                                                                                                                  |                                                                                          |                                                                                                                                                                                                                                                          |   |                       |   |                |   |                 |   |                           |   |   |
| 3  | 12-17 years old                                                                                                                                                 |                                                                                          |                                                                                                                                                                                                                                                          |   |                       |   |                |   |                 |   |                           |   |   |
| 4  | greater than 18 years old                                                                                                                                       |                                                                                          |                                                                                                                                                                                                                                                          |   |                       |   |                |   |                 |   |                           |   |   |
| 28 | child_3<br>Show the field ONLY if: [numberchildren] = '3' or [numberchildren] = '4' or [numberchildren] = 5                                                     | Child 3                                                                                  | radio (Matrix)<br><table border="1"> <tr> <td>1</td> <td>less than 5 years old</td> </tr> <tr> <td>2</td> <td>5-11 years old</td> </tr> <tr> <td>3</td> <td>12-17 years old</td> </tr> <tr> <td>4</td> <td>greater than 18 years old</td> </tr> </table> | 1 | less than 5 years old | 2 | 5-11 years old | 3 | 12-17 years old | 4 | greater than 18 years old |   |   |
| 1  | less than 5 years old                                                                                                                                           |                                                                                          |                                                                                                                                                                                                                                                          |   |                       |   |                |   |                 |   |                           |   |   |
| 2  | 5-11 years old                                                                                                                                                  |                                                                                          |                                                                                                                                                                                                                                                          |   |                       |   |                |   |                 |   |                           |   |   |
| 3  | 12-17 years old                                                                                                                                                 |                                                                                          |                                                                                                                                                                                                                                                          |   |                       |   |                |   |                 |   |                           |   |   |
| 4  | greater than 18 years old                                                                                                                                       |                                                                                          |                                                                                                                                                                                                                                                          |   |                       |   |                |   |                 |   |                           |   |   |
| 29 | child_4<br>Show the field ONLY if: [numberchildren] = '4' or [numberchildren] = 5                                                                               | Child 4                                                                                  | radio (Matrix)<br><table border="1"> <tr> <td>1</td> <td>less than 5 years old</td> </tr> <tr> <td>2</td> <td>5-11 years old</td> </tr> <tr> <td>3</td> <td>12-17 years old</td> </tr> <tr> <td>4</td> <td>greater than 18 years old</td> </tr> </table> | 1 | less than 5 years old | 2 | 5-11 years old | 3 | 12-17 years old | 4 | greater than 18 years old |   |   |
| 1  | less than 5 years old                                                                                                                                           |                                                                                          |                                                                                                                                                                                                                                                          |   |                       |   |                |   |                 |   |                           |   |   |
| 2  | 5-11 years old                                                                                                                                                  |                                                                                          |                                                                                                                                                                                                                                                          |   |                       |   |                |   |                 |   |                           |   |   |
| 3  | 12-17 years old                                                                                                                                                 |                                                                                          |                                                                                                                                                                                                                                                          |   |                       |   |                |   |                 |   |                           |   |   |
| 4  | greater than 18 years old                                                                                                                                       |                                                                                          |                                                                                                                                                                                                                                                          |   |                       |   |                |   |                 |   |                           |   |   |
| 30 | child_5<br>Show the field ONLY if: [numberchildren] = 5                                                                                                         | Child 5                                                                                  | radio (Matrix)<br><table border="1"> <tr> <td>1</td> <td>less than 5 years old</td> </tr> <tr> <td>2</td> <td>5-11 years old</td> </tr> <tr> <td>3</td> <td>12-17 years old</td> </tr> <tr> <td>4</td> <td>greater than 18 years old</td> </tr> </table> | 1 | less than 5 years old | 2 | 5-11 years old | 3 | 12-17 years old | 4 | greater than 18 years old |   |   |
| 1  | less than 5 years old                                                                                                                                           |                                                                                          |                                                                                                                                                                                                                                                          |   |                       |   |                |   |                 |   |                           |   |   |
| 2  | 5-11 years old                                                                                                                                                  |                                                                                          |                                                                                                                                                                                                                                                          |   |                       |   |                |   |                 |   |                           |   |   |
| 3  | 12-17 years old                                                                                                                                                 |                                                                                          |                                                                                                                                                                                                                                                          |   |                       |   |                |   |                 |   |                           |   |   |
| 4  | greater than 18 years old                                                                                                                                       |                                                                                          |                                                                                                                                                                                                                                                          |   |                       |   |                |   |                 |   |                           |   |   |
| 31 | child_1_rec_firstdose_5<br>Show the field ONLY if: [child_1] = '2'                                                                                              | Has your child aged 5-11 years old received their first dose of COVID-19 vaccine?        | yesno<br><table border="1"> <tr> <td>1</td> <td>Yes</td> </tr> <tr> <td>0</td> <td>No</td> </tr> </table>                                                                                                                                                | 1 | Yes                   | 0 | No             |   |                 |   |                           |   |   |
| 1  | Yes                                                                                                                                                             |                                                                                          |                                                                                                                                                                                                                                                          |   |                       |   |                |   |                 |   |                           |   |   |
| 0  | No                                                                                                                                                              |                                                                                          |                                                                                                                                                                                                                                                          |   |                       |   |                |   |                 |   |                           |   |   |
| 32 | child_1_compl_series_5<br>Show the field ONLY if: [child_1_rec_firstdose_5] = '1'                                                                               | Has your child aged 5-11 years old completed the COVID-19 vaccine series?                | yesno<br><table border="1"> <tr> <td>1</td> <td>Yes</td> </tr> <tr> <td>0</td> <td>No</td> </tr> </table>                                                                                                                                                | 1 | Yes                   | 0 | No             |   |                 |   |                           |   |   |
| 1  | Yes                                                                                                                                                             |                                                                                          |                                                                                                                                                                                                                                                          |   |                       |   |                |   |                 |   |                           |   |   |
| 0  | No                                                                                                                                                              |                                                                                          |                                                                                                                                                                                                                                                          |   |                       |   |                |   |                 |   |                           |   |   |
| 33 | child_1_intent_5<br>Show the field ONLY if: [child_1_rec_firstdose_5] = '0'                                                                                     | Are you planning to get your 5-11 year old child COVID-19 vaccinated?                    | yesno<br><table border="1"> <tr> <td>1</td> <td>Yes</td> </tr> <tr> <td>0</td> <td>No</td> </tr> </table>                                                                                                                                                | 1 | Yes                   | 0 | No             |   |                 |   |                           |   |   |
| 1  | Yes                                                                                                                                                             |                                                                                          |                                                                                                                                                                                                                                                          |   |                       |   |                |   |                 |   |                           |   |   |
| 0  | No                                                                                                                                                              |                                                                                          |                                                                                                                                                                                                                                                          |   |                       |   |                |   |                 |   |                           |   |   |
| 34 | child_2_rec_firstdose_5<br>Show the field ONLY if: [child_2] = '2'                                                                                              | Has your second child aged 5-11 years old received their first dose of COVID-19 vaccine? | yesno<br><table border="1"> <tr> <td>1</td> <td>Yes</td> </tr> <tr> <td>0</td> <td>No</td> </tr> </table>                                                                                                                                                | 1 | Yes                   | 0 | No             |   |                 |   |                           |   |   |
| 1  | Yes                                                                                                                                                             |                                                                                          |                                                                                                                                                                                                                                                          |   |                       |   |                |   |                 |   |                           |   |   |
| 0  | No                                                                                                                                                              |                                                                                          |                                                                                                                                                                                                                                                          |   |                       |   |                |   |                 |   |                           |   |   |



|    |                                                                                        |                                                                                           |                        |
|----|----------------------------------------------------------------------------------------|-------------------------------------------------------------------------------------------|------------------------|
| 35 | child_2_compl_series_5<br>Show the field ONLY if:<br>[child_2_rec_firstdose_5] = '1'   | Has your second child aged 5-11 years old completed the COVID-19 vaccine series?          | yesno<br>1 Yes<br>0 No |
| 36 | child_2_intent_5<br>Show the field ONLY if:<br>[child_2_rec_firstdose_5] = '0'         | Are you planning to get your second 5-11 year old child COVID-19 vaccinated?              | yesno<br>1 Yes<br>0 No |
| 37 | child_3_rec_firstdose_5<br>Show the field ONLY if:<br>[child_3] = '2'                  | Has your third child aged 5-11 years old received their first dose of COVID-19 vaccine?   | yesno<br>1 Yes<br>0 No |
| 38 | child_3_compl_series_5<br>Show the field ONLY if:<br>[child_3_rec_firstdose_5] = '1'   | Has your third child aged 5-11 years old completed the COVID-19 vaccine series?           | yesno<br>1 Yes<br>0 No |
| 39 | child_3_intent_5<br>Show the field ONLY if:<br>[child_3_rec_firstdose_12] = '0'        | Are you planning to get your third 5-11 year old child COVID-19 vaccinated?               | yesno<br>1 Yes<br>0 No |
| 40 | child_4_rec_firstdose_5<br>Show the field ONLY if:<br>[child_4] = '2'                  | Has your fourth child aged 5-11 years old received their first dose of COVID-19 vaccine?  | yesno<br>1 Yes<br>0 No |
| 41 | child_4_compl_series_5<br>Show the field ONLY if:<br>[child_4_rec_firstdose_5] = '1'   | Has your fourth child aged 5-11 years old completed the COVID-19 vaccine series?          | yesno<br>1 Yes<br>0 No |
| 42 | child_4_intent_5<br>Show the field ONLY if:<br>[child_4_rec_firstdose_12] = '0'        | Are you planning to get your fourth 5-11 year old child COVID-19 vaccinated?              | yesno<br>1 Yes<br>0 No |
| 43 | child_5_rec_firstdose_5<br>Show the field ONLY if:<br>[child_5] = '2'                  | Has your fifth child aged 5-11 years old received their first dose of COVID-19 vaccine?   | yesno<br>1 Yes<br>0 No |
| 44 | child_5_compl_series_5<br>Show the field ONLY if:<br>[child_5_rec_firstdose_5] = '1'   | Has your fifth child aged 5-11 years old completed the COVID-19 vaccine series?           | yesno<br>1 Yes<br>0 No |
| 45 | child_5_intent_5<br>Show the field ONLY if:<br>[child_5_rec_firstdose_5] = '0'         | Are you planning to get your fifth 5-11 year old child COVID-19 vaccinated?               | yesno<br>1 Yes<br>0 No |
| 46 | child_1_rec_firstdose_12<br>Show the field ONLY if:<br>[child_1] = '3'                 | Has your child aged 12-17 years old received their first dose of COVID-19 vaccine?        | yesno<br>1 Yes<br>0 No |
| 47 | child_1_compl_series_12<br>Show the field ONLY if:<br>[child_1_rec_firstdose_12] = '1' | Has your 12-17 year old child completed the COVID-19 vaccine series?                      | yesno<br>1 Yes<br>0 No |
| 48 | child_1_intent_12<br>Show the field ONLY if:<br>[child_1_rec_firstdose_12] = '0'       | Are you planning to get your 12-17 year old child COVID-19 vaccinated?                    | yesno<br>1 Yes<br>0 No |
| 49 | child_2_rec_firstdose_12<br>Show the field ONLY if:<br>[child_2] = '3'                 | Has your second child aged 12-17 years old received their first dose of COVID-19 vaccine? | yesno<br>1 Yes<br>0 No |

|    |                                                                                        |                                                                                           |                        |
|----|----------------------------------------------------------------------------------------|-------------------------------------------------------------------------------------------|------------------------|
| 50 | child_2_compl_series_12<br>Show the field ONLY if:<br>[child_2_rec_firstdose_12] = '1' | Has your second 12-17 year old child completed the COVID-19 vaccine series?               | yesno<br>1 Yes<br>0 No |
| 51 | child_2_intent_12<br>Show the field ONLY if:<br>[child_2_rec_firstdose_12] = '0'       | Are you planning to get your second 12-17 year old child COVID-19 vaccinated?             | yesno<br>1 Yes<br>0 No |
| 52 | child_3_rec_firstdose_12<br>Show the field ONLY if:<br>[child_3] = '3'                 | Has your third child aged 12-17 years old received their first dose of COVID-19 vaccine?  | yesno<br>1 Yes<br>0 No |
| 53 | child_3_compl_series_12<br>Show the field ONLY if:<br>[child_3_rec_firstdose_12] = '1' | Has your third 12-17 year old child completed the COVID-19 vaccine series?                | yesno<br>1 Yes<br>0 No |
| 54 | child_3_intent_12<br>Show the field ONLY if:<br>[child_3_rec_firstdose_12] = '0'       | Are you planning to get your third 12-17 year old child COVID-19 vaccinated?              | yesno<br>1 Yes<br>0 No |
| 55 | child_4_rec_firstdose_12<br>Show the field ONLY if:<br>[child_4] = '3'                 | Has your fourth child aged 12-17 years old received their first dose of COVID-19 vaccine? | yesno<br>1 Yes<br>0 No |
| 56 | child_4_compl_series_12<br>Show the field ONLY if:<br>[child_4_rec_firstdose_5] = '1'  | Has your fourth 12-17 year old child completed the COVID-19 vaccine series?               | yesno<br>1 Yes<br>0 No |
| 57 | child_4_intent_12<br>Show the field ONLY if:<br>[child_4_rec_firstdose_5] = '0'        | Are you planning to get your fourth 12-17 year old child COVID-19 vaccinated?             | yesno<br>1 Yes<br>0 No |
| 58 | child_5_rec_firstdose_12<br>Show the field ONLY if:<br>[child_5] = '3'                 | Has your fifth child aged 12-17 years old received their first dose of COVID-19 vaccine?  | yesno<br>1 Yes<br>0 No |
| 59 | child_5_compl_series_12<br>Show the field ONLY if:<br>[child_5_rec_firstdose_12] = '1' | Has your fifth 12-17 year old child completed the COVID-19 vaccine series?                | yesno<br>1 Yes<br>0 No |
| 60 | child_5_intent_12<br>Show the field ONLY if:<br>[child_5_rec_firstdose_12] = '0'       | Are you planning to get your fifth 12-17 year old child COVID-19 vaccinated?              | yesno<br>1 Yes<br>0 No |

|    |                                                                            |                                                                                                                                                                                                                                                                                       |                                                                                                                                                                                                                                                                                                                                                                                                                                                                                                                                                                                                                                                                                                                                                                                                                                                                                                                                                                                                                                           |   |                   |               |          |                  |          |   |                  |                     |                |                  |                      |   |                  |         |   |                  |            |   |                  |                         |   |                  |                     |   |                  |                              |    |                   |                                                                           |    |                   |                                                                     |    |                   |                   |
|----|----------------------------------------------------------------------------|---------------------------------------------------------------------------------------------------------------------------------------------------------------------------------------------------------------------------------------------------------------------------------------|-------------------------------------------------------------------------------------------------------------------------------------------------------------------------------------------------------------------------------------------------------------------------------------------------------------------------------------------------------------------------------------------------------------------------------------------------------------------------------------------------------------------------------------------------------------------------------------------------------------------------------------------------------------------------------------------------------------------------------------------------------------------------------------------------------------------------------------------------------------------------------------------------------------------------------------------------------------------------------------------------------------------------------------------|---|-------------------|---------------|----------|------------------|----------|---|------------------|---------------------|----------------|------------------|----------------------|---|------------------|---------|---|------------------|------------|---|------------------|-------------------------|---|------------------|---------------------|---|------------------|------------------------------|----|-------------------|---------------------------------------------------------------------------|----|-------------------|---------------------------------------------------------------------|----|-------------------|-------------------|
| 61 | <p>chronic_child</p> <p>Show the field ONLY if: [parentguardian] = '1'</p> | <p>Please check all the medical conditions that apply to your child(ren).</p>                                                                                                                                                                                                         | <p>checkbox</p> <table border="1"> <tr><td>1</td><td>chronic_child__1</td><td>Heart disease</td></tr> <tr><td>2</td><td>chronic_child__2</td><td>Diabetes</td></tr> <tr><td>3</td><td>chronic_child__3</td><td>High blood pressure</td></tr> <tr><td>4</td><td>chronic_child__4</td><td>Chronic lung disease</td></tr> <tr><td>5</td><td>chronic_child__5</td><td>Obesity</td></tr> <tr><td>6</td><td>chronic_child__6</td><td>Pregnancy,</td></tr> <tr><td>7</td><td>chronic_child__7</td><td>Chronic kidney disease,</td></tr> <tr><td>8</td><td>chronic_child__8</td><td>Sickle cell disease</td></tr> <tr><td>9</td><td>chronic_child__9</td><td>Neurodevelopmental disorders</td></tr> <tr><td>10</td><td>chronic_child__10</td><td>Medically complex (eg. CP, genetic syndrome, severe congenital anomalies)</td></tr> <tr><td>11</td><td>chronic_child__11</td><td>Medical-related technologic dependence (g-tube, trach, ventilation)</td></tr> <tr><td>12</td><td>chronic_child__12</td><td>None of the above</td></tr> </table> | 1 | chronic_child__1  | Heart disease | 2        | chronic_child__2 | Diabetes | 3 | chronic_child__3 | High blood pressure | 4              | chronic_child__4 | Chronic lung disease | 5 | chronic_child__5 | Obesity | 6 | chronic_child__6 | Pregnancy, | 7 | chronic_child__7 | Chronic kidney disease, | 8 | chronic_child__8 | Sickle cell disease | 9 | chronic_child__9 | Neurodevelopmental disorders | 10 | chronic_child__10 | Medically complex (eg. CP, genetic syndrome, severe congenital anomalies) | 11 | chronic_child__11 | Medical-related technologic dependence (g-tube, trach, ventilation) | 12 | chronic_child__12 | None of the above |
| 1  | chronic_child__1                                                           | Heart disease                                                                                                                                                                                                                                                                         |                                                                                                                                                                                                                                                                                                                                                                                                                                                                                                                                                                                                                                                                                                                                                                                                                                                                                                                                                                                                                                           |   |                   |               |          |                  |          |   |                  |                     |                |                  |                      |   |                  |         |   |                  |            |   |                  |                         |   |                  |                     |   |                  |                              |    |                   |                                                                           |    |                   |                                                                     |    |                   |                   |
| 2  | chronic_child__2                                                           | Diabetes                                                                                                                                                                                                                                                                              |                                                                                                                                                                                                                                                                                                                                                                                                                                                                                                                                                                                                                                                                                                                                                                                                                                                                                                                                                                                                                                           |   |                   |               |          |                  |          |   |                  |                     |                |                  |                      |   |                  |         |   |                  |            |   |                  |                         |   |                  |                     |   |                  |                              |    |                   |                                                                           |    |                   |                                                                     |    |                   |                   |
| 3  | chronic_child__3                                                           | High blood pressure                                                                                                                                                                                                                                                                   |                                                                                                                                                                                                                                                                                                                                                                                                                                                                                                                                                                                                                                                                                                                                                                                                                                                                                                                                                                                                                                           |   |                   |               |          |                  |          |   |                  |                     |                |                  |                      |   |                  |         |   |                  |            |   |                  |                         |   |                  |                     |   |                  |                              |    |                   |                                                                           |    |                   |                                                                     |    |                   |                   |
| 4  | chronic_child__4                                                           | Chronic lung disease                                                                                                                                                                                                                                                                  |                                                                                                                                                                                                                                                                                                                                                                                                                                                                                                                                                                                                                                                                                                                                                                                                                                                                                                                                                                                                                                           |   |                   |               |          |                  |          |   |                  |                     |                |                  |                      |   |                  |         |   |                  |            |   |                  |                         |   |                  |                     |   |                  |                              |    |                   |                                                                           |    |                   |                                                                     |    |                   |                   |
| 5  | chronic_child__5                                                           | Obesity                                                                                                                                                                                                                                                                               |                                                                                                                                                                                                                                                                                                                                                                                                                                                                                                                                                                                                                                                                                                                                                                                                                                                                                                                                                                                                                                           |   |                   |               |          |                  |          |   |                  |                     |                |                  |                      |   |                  |         |   |                  |            |   |                  |                         |   |                  |                     |   |                  |                              |    |                   |                                                                           |    |                   |                                                                     |    |                   |                   |
| 6  | chronic_child__6                                                           | Pregnancy,                                                                                                                                                                                                                                                                            |                                                                                                                                                                                                                                                                                                                                                                                                                                                                                                                                                                                                                                                                                                                                                                                                                                                                                                                                                                                                                                           |   |                   |               |          |                  |          |   |                  |                     |                |                  |                      |   |                  |         |   |                  |            |   |                  |                         |   |                  |                     |   |                  |                              |    |                   |                                                                           |    |                   |                                                                     |    |                   |                   |
| 7  | chronic_child__7                                                           | Chronic kidney disease,                                                                                                                                                                                                                                                               |                                                                                                                                                                                                                                                                                                                                                                                                                                                                                                                                                                                                                                                                                                                                                                                                                                                                                                                                                                                                                                           |   |                   |               |          |                  |          |   |                  |                     |                |                  |                      |   |                  |         |   |                  |            |   |                  |                         |   |                  |                     |   |                  |                              |    |                   |                                                                           |    |                   |                                                                     |    |                   |                   |
| 8  | chronic_child__8                                                           | Sickle cell disease                                                                                                                                                                                                                                                                   |                                                                                                                                                                                                                                                                                                                                                                                                                                                                                                                                                                                                                                                                                                                                                                                                                                                                                                                                                                                                                                           |   |                   |               |          |                  |          |   |                  |                     |                |                  |                      |   |                  |         |   |                  |            |   |                  |                         |   |                  |                     |   |                  |                              |    |                   |                                                                           |    |                   |                                                                     |    |                   |                   |
| 9  | chronic_child__9                                                           | Neurodevelopmental disorders                                                                                                                                                                                                                                                          |                                                                                                                                                                                                                                                                                                                                                                                                                                                                                                                                                                                                                                                                                                                                                                                                                                                                                                                                                                                                                                           |   |                   |               |          |                  |          |   |                  |                     |                |                  |                      |   |                  |         |   |                  |            |   |                  |                         |   |                  |                     |   |                  |                              |    |                   |                                                                           |    |                   |                                                                     |    |                   |                   |
| 10 | chronic_child__10                                                          | Medically complex (eg. CP, genetic syndrome, severe congenital anomalies)                                                                                                                                                                                                             |                                                                                                                                                                                                                                                                                                                                                                                                                                                                                                                                                                                                                                                                                                                                                                                                                                                                                                                                                                                                                                           |   |                   |               |          |                  |          |   |                  |                     |                |                  |                      |   |                  |         |   |                  |            |   |                  |                         |   |                  |                     |   |                  |                              |    |                   |                                                                           |    |                   |                                                                     |    |                   |                   |
| 11 | chronic_child__11                                                          | Medical-related technologic dependence (g-tube, trach, ventilation)                                                                                                                                                                                                                   |                                                                                                                                                                                                                                                                                                                                                                                                                                                                                                                                                                                                                                                                                                                                                                                                                                                                                                                                                                                                                                           |   |                   |               |          |                  |          |   |                  |                     |                |                  |                      |   |                  |         |   |                  |            |   |                  |                         |   |                  |                     |   |                  |                              |    |                   |                                                                           |    |                   |                                                                     |    |                   |                   |
| 12 | chronic_child__12                                                          | None of the above                                                                                                                                                                                                                                                                     |                                                                                                                                                                                                                                                                                                                                                                                                                                                                                                                                                                                                                                                                                                                                                                                                                                                                                                                                                                                                                                           |   |                   |               |          |                  |          |   |                  |                     |                |                  |                      |   |                  |         |   |                  |            |   |                  |                         |   |                  |                     |   |                  |                              |    |                   |                                                                           |    |                   |                                                                     |    |                   |                   |
| 62 | <p>safe</p>                                                                | <p>Section Header: <i>Section 1: Please rate your level of agreement to each statement below.</i></p> <p>Routine childhood vaccines are safe</p>                                                                                                                                      | <p>radio (Matrix)</p> <table border="1"> <tr><td>0</td><td>Strongly disagree</td></tr> <tr><td>1</td><td>Disagree</td></tr> <tr><td>2</td><td>Neutral</td></tr> <tr><td>3</td><td>Agree</td></tr> <tr><td>4</td><td>Strongly agree</td></tr> </table>                                                                                                                                                                                                                                                                                                                                                                                                                                                                                                                                                                                                                                                                                                                                                                                     | 0 | Strongly disagree | 1             | Disagree | 2                | Neutral  | 3 | Agree            | 4                   | Strongly agree |                  |                      |   |                  |         |   |                  |            |   |                  |                         |   |                  |                     |   |                  |                              |    |                   |                                                                           |    |                   |                                                                     |    |                   |                   |
| 0  | Strongly disagree                                                          |                                                                                                                                                                                                                                                                                       |                                                                                                                                                                                                                                                                                                                                                                                                                                                                                                                                                                                                                                                                                                                                                                                                                                                                                                                                                                                                                                           |   |                   |               |          |                  |          |   |                  |                     |                |                  |                      |   |                  |         |   |                  |            |   |                  |                         |   |                  |                     |   |                  |                              |    |                   |                                                                           |    |                   |                                                                     |    |                   |                   |
| 1  | Disagree                                                                   |                                                                                                                                                                                                                                                                                       |                                                                                                                                                                                                                                                                                                                                                                                                                                                                                                                                                                                                                                                                                                                                                                                                                                                                                                                                                                                                                                           |   |                   |               |          |                  |          |   |                  |                     |                |                  |                      |   |                  |         |   |                  |            |   |                  |                         |   |                  |                     |   |                  |                              |    |                   |                                                                           |    |                   |                                                                     |    |                   |                   |
| 2  | Neutral                                                                    |                                                                                                                                                                                                                                                                                       |                                                                                                                                                                                                                                                                                                                                                                                                                                                                                                                                                                                                                                                                                                                                                                                                                                                                                                                                                                                                                                           |   |                   |               |          |                  |          |   |                  |                     |                |                  |                      |   |                  |         |   |                  |            |   |                  |                         |   |                  |                     |   |                  |                              |    |                   |                                                                           |    |                   |                                                                     |    |                   |                   |
| 3  | Agree                                                                      |                                                                                                                                                                                                                                                                                       |                                                                                                                                                                                                                                                                                                                                                                                                                                                                                                                                                                                                                                                                                                                                                                                                                                                                                                                                                                                                                                           |   |                   |               |          |                  |          |   |                  |                     |                |                  |                      |   |                  |         |   |                  |            |   |                  |                         |   |                  |                     |   |                  |                              |    |                   |                                                                           |    |                   |                                                                     |    |                   |                   |
| 4  | Strongly agree                                                             |                                                                                                                                                                                                                                                                                       |                                                                                                                                                                                                                                                                                                                                                                                                                                                                                                                                                                                                                                                                                                                                                                                                                                                                                                                                                                                                                                           |   |                   |               |          |                  |          |   |                  |                     |                |                  |                      |   |                  |         |   |                  |            |   |                  |                         |   |                  |                     |   |                  |                              |    |                   |                                                                           |    |                   |                                                                     |    |                   |                   |
| 63 | <p>benefitrisk</p>                                                         | <p>For a majority of the population, the protective benefits obtained from vaccinating outweigh the possible risks that may occur as a result of vaccinating (e.g. side effects, adverse events).</p>                                                                                 | <p>radio (Matrix)</p> <table border="1"> <tr><td>0</td><td>Strongly disagree</td></tr> <tr><td>1</td><td>Disagree</td></tr> <tr><td>2</td><td>Neutral</td></tr> <tr><td>3</td><td>Agree</td></tr> <tr><td>4</td><td>Strongly agree</td></tr> </table>                                                                                                                                                                                                                                                                                                                                                                                                                                                                                                                                                                                                                                                                                                                                                                                     | 0 | Strongly disagree | 1             | Disagree | 2                | Neutral  | 3 | Agree            | 4                   | Strongly agree |                  |                      |   |                  |         |   |                  |            |   |                  |                         |   |                  |                     |   |                  |                              |    |                   |                                                                           |    |                   |                                                                     |    |                   |                   |
| 0  | Strongly disagree                                                          |                                                                                                                                                                                                                                                                                       |                                                                                                                                                                                                                                                                                                                                                                                                                                                                                                                                                                                                                                                                                                                                                                                                                                                                                                                                                                                                                                           |   |                   |               |          |                  |          |   |                  |                     |                |                  |                      |   |                  |         |   |                  |            |   |                  |                         |   |                  |                     |   |                  |                              |    |                   |                                                                           |    |                   |                                                                     |    |                   |                   |
| 1  | Disagree                                                                   |                                                                                                                                                                                                                                                                                       |                                                                                                                                                                                                                                                                                                                                                                                                                                                                                                                                                                                                                                                                                                                                                                                                                                                                                                                                                                                                                                           |   |                   |               |          |                  |          |   |                  |                     |                |                  |                      |   |                  |         |   |                  |            |   |                  |                         |   |                  |                     |   |                  |                              |    |                   |                                                                           |    |                   |                                                                     |    |                   |                   |
| 2  | Neutral                                                                    |                                                                                                                                                                                                                                                                                       |                                                                                                                                                                                                                                                                                                                                                                                                                                                                                                                                                                                                                                                                                                                                                                                                                                                                                                                                                                                                                                           |   |                   |               |          |                  |          |   |                  |                     |                |                  |                      |   |                  |         |   |                  |            |   |                  |                         |   |                  |                     |   |                  |                              |    |                   |                                                                           |    |                   |                                                                     |    |                   |                   |
| 3  | Agree                                                                      |                                                                                                                                                                                                                                                                                       |                                                                                                                                                                                                                                                                                                                                                                                                                                                                                                                                                                                                                                                                                                                                                                                                                                                                                                                                                                                                                                           |   |                   |               |          |                  |          |   |                  |                     |                |                  |                      |   |                  |         |   |                  |            |   |                  |                         |   |                  |                     |   |                  |                              |    |                   |                                                                           |    |                   |                                                                     |    |                   |                   |
| 4  | Strongly agree                                                             |                                                                                                                                                                                                                                                                                       |                                                                                                                                                                                                                                                                                                                                                                                                                                                                                                                                                                                                                                                                                                                                                                                                                                                                                                                                                                                                                                           |   |                   |               |          |                  |          |   |                  |                     |                |                  |                      |   |                  |         |   |                  |            |   |                  |                         |   |                  |                     |   |                  |                              |    |                   |                                                                           |    |                   |                                                                     |    |                   |                   |
| 64 | <p>prevent</p>                                                             | <p>Vaccines are an effective way to prevent many different diseases, such as COVID-19, measles, hepatitis B, and polio.</p>                                                                                                                                                           | <p>radio (Matrix)</p> <table border="1"> <tr><td>0</td><td>Strongly disagree</td></tr> <tr><td>1</td><td>Disagree</td></tr> <tr><td>2</td><td>Neutral</td></tr> <tr><td>3</td><td>Agree</td></tr> <tr><td>4</td><td>Strongly agree</td></tr> </table>                                                                                                                                                                                                                                                                                                                                                                                                                                                                                                                                                                                                                                                                                                                                                                                     | 0 | Strongly disagree | 1             | Disagree | 2                | Neutral  | 3 | Agree            | 4                   | Strongly agree |                  |                      |   |                  |         |   |                  |            |   |                  |                         |   |                  |                     |   |                  |                              |    |                   |                                                                           |    |                   |                                                                     |    |                   |                   |
| 0  | Strongly disagree                                                          |                                                                                                                                                                                                                                                                                       |                                                                                                                                                                                                                                                                                                                                                                                                                                                                                                                                                                                                                                                                                                                                                                                                                                                                                                                                                                                                                                           |   |                   |               |          |                  |          |   |                  |                     |                |                  |                      |   |                  |         |   |                  |            |   |                  |                         |   |                  |                     |   |                  |                              |    |                   |                                                                           |    |                   |                                                                     |    |                   |                   |
| 1  | Disagree                                                                   |                                                                                                                                                                                                                                                                                       |                                                                                                                                                                                                                                                                                                                                                                                                                                                                                                                                                                                                                                                                                                                                                                                                                                                                                                                                                                                                                                           |   |                   |               |          |                  |          |   |                  |                     |                |                  |                      |   |                  |         |   |                  |            |   |                  |                         |   |                  |                     |   |                  |                              |    |                   |                                                                           |    |                   |                                                                     |    |                   |                   |
| 2  | Neutral                                                                    |                                                                                                                                                                                                                                                                                       |                                                                                                                                                                                                                                                                                                                                                                                                                                                                                                                                                                                                                                                                                                                                                                                                                                                                                                                                                                                                                                           |   |                   |               |          |                  |          |   |                  |                     |                |                  |                      |   |                  |         |   |                  |            |   |                  |                         |   |                  |                     |   |                  |                              |    |                   |                                                                           |    |                   |                                                                     |    |                   |                   |
| 3  | Agree                                                                      |                                                                                                                                                                                                                                                                                       |                                                                                                                                                                                                                                                                                                                                                                                                                                                                                                                                                                                                                                                                                                                                                                                                                                                                                                                                                                                                                                           |   |                   |               |          |                  |          |   |                  |                     |                |                  |                      |   |                  |         |   |                  |            |   |                  |                         |   |                  |                     |   |                  |                              |    |                   |                                                                           |    |                   |                                                                     |    |                   |                   |
| 4  | Strongly agree                                                             |                                                                                                                                                                                                                                                                                       |                                                                                                                                                                                                                                                                                                                                                                                                                                                                                                                                                                                                                                                                                                                                                                                                                                                                                                                                                                                                                                           |   |                   |               |          |                  |          |   |                  |                     |                |                  |                      |   |                  |         |   |                  |            |   |                  |                         |   |                  |                     |   |                  |                              |    |                   |                                                                           |    |                   |                                                                     |    |                   |                   |
| 65 | <p>recommendations</p>                                                     | <p>The current number of recommended childhood vaccines, when received in accordance with the Advisory Committee on Immunization Practices (ACIP) and the Center for Disease Control and Prevention (CDC) recommended schedule, place an undue burden on a child's immune system.</p> | <p>radio (Matrix)</p> <table border="1"> <tr><td>0</td><td>Strongly disagree</td></tr> <tr><td>1</td><td>Disagree</td></tr> <tr><td>2</td><td>Neutral</td></tr> <tr><td>3</td><td>Agree</td></tr> <tr><td>4</td><td>Strongly agree</td></tr> </table>                                                                                                                                                                                                                                                                                                                                                                                                                                                                                                                                                                                                                                                                                                                                                                                     | 0 | Strongly disagree | 1             | Disagree | 2                | Neutral  | 3 | Agree            | 4                   | Strongly agree |                  |                      |   |                  |         |   |                  |            |   |                  |                         |   |                  |                     |   |                  |                              |    |                   |                                                                           |    |                   |                                                                     |    |                   |                   |
| 0  | Strongly disagree                                                          |                                                                                                                                                                                                                                                                                       |                                                                                                                                                                                                                                                                                                                                                                                                                                                                                                                                                                                                                                                                                                                                                                                                                                                                                                                                                                                                                                           |   |                   |               |          |                  |          |   |                  |                     |                |                  |                      |   |                  |         |   |                  |            |   |                  |                         |   |                  |                     |   |                  |                              |    |                   |                                                                           |    |                   |                                                                     |    |                   |                   |
| 1  | Disagree                                                                   |                                                                                                                                                                                                                                                                                       |                                                                                                                                                                                                                                                                                                                                                                                                                                                                                                                                                                                                                                                                                                                                                                                                                                                                                                                                                                                                                                           |   |                   |               |          |                  |          |   |                  |                     |                |                  |                      |   |                  |         |   |                  |            |   |                  |                         |   |                  |                     |   |                  |                              |    |                   |                                                                           |    |                   |                                                                     |    |                   |                   |
| 2  | Neutral                                                                    |                                                                                                                                                                                                                                                                                       |                                                                                                                                                                                                                                                                                                                                                                                                                                                                                                                                                                                                                                                                                                                                                                                                                                                                                                                                                                                                                                           |   |                   |               |          |                  |          |   |                  |                     |                |                  |                      |   |                  |         |   |                  |            |   |                  |                         |   |                  |                     |   |                  |                              |    |                   |                                                                           |    |                   |                                                                     |    |                   |                   |
| 3  | Agree                                                                      |                                                                                                                                                                                                                                                                                       |                                                                                                                                                                                                                                                                                                                                                                                                                                                                                                                                                                                                                                                                                                                                                                                                                                                                                                                                                                                                                                           |   |                   |               |          |                  |          |   |                  |                     |                |                  |                      |   |                  |         |   |                  |            |   |                  |                         |   |                  |                     |   |                  |                              |    |                   |                                                                           |    |                   |                                                                     |    |                   |                   |
| 4  | Strongly agree                                                             |                                                                                                                                                                                                                                                                                       |                                                                                                                                                                                                                                                                                                                                                                                                                                                                                                                                                                                                                                                                                                                                                                                                                                                                                                                                                                                                                                           |   |                   |               |          |                  |          |   |                  |                     |                |                  |                      |   |                  |         |   |                  |            |   |                  |                         |   |                  |                     |   |                  |                              |    |                   |                                                                           |    |                   |                                                                     |    |                   |                   |
| 66 | <p>influence</p>                                                           | <p>Parents and caregivers should have influence over what vaccines are given to their children, even if their opinion and beliefs are counter to scientific evidence currently available regarding vaccination.</p>                                                                   | <p>radio (Matrix)</p> <table border="1"> <tr><td>0</td><td>Strongly disagree</td></tr> <tr><td>1</td><td>Disagree</td></tr> <tr><td>2</td><td>Neutral</td></tr> <tr><td>3</td><td>Agree</td></tr> <tr><td>4</td><td>Strongly agree</td></tr> </table>                                                                                                                                                                                                                                                                                                                                                                                                                                                                                                                                                                                                                                                                                                                                                                                     | 0 | Strongly disagree | 1             | Disagree | 2                | Neutral  | 3 | Agree            | 4                   | Strongly agree |                  |                      |   |                  |         |   |                  |            |   |                  |                         |   |                  |                     |   |                  |                              |    |                   |                                                                           |    |                   |                                                                     |    |                   |                   |
| 0  | Strongly disagree                                                          |                                                                                                                                                                                                                                                                                       |                                                                                                                                                                                                                                                                                                                                                                                                                                                                                                                                                                                                                                                                                                                                                                                                                                                                                                                                                                                                                                           |   |                   |               |          |                  |          |   |                  |                     |                |                  |                      |   |                  |         |   |                  |            |   |                  |                         |   |                  |                     |   |                  |                              |    |                   |                                                                           |    |                   |                                                                     |    |                   |                   |
| 1  | Disagree                                                                   |                                                                                                                                                                                                                                                                                       |                                                                                                                                                                                                                                                                                                                                                                                                                                                                                                                                                                                                                                                                                                                                                                                                                                                                                                                                                                                                                                           |   |                   |               |          |                  |          |   |                  |                     |                |                  |                      |   |                  |         |   |                  |            |   |                  |                         |   |                  |                     |   |                  |                              |    |                   |                                                                           |    |                   |                                                                     |    |                   |                   |
| 2  | Neutral                                                                    |                                                                                                                                                                                                                                                                                       |                                                                                                                                                                                                                                                                                                                                                                                                                                                                                                                                                                                                                                                                                                                                                                                                                                                                                                                                                                                                                                           |   |                   |               |          |                  |          |   |                  |                     |                |                  |                      |   |                  |         |   |                  |            |   |                  |                         |   |                  |                     |   |                  |                              |    |                   |                                                                           |    |                   |                                                                     |    |                   |                   |
| 3  | Agree                                                                      |                                                                                                                                                                                                                                                                                       |                                                                                                                                                                                                                                                                                                                                                                                                                                                                                                                                                                                                                                                                                                                                                                                                                                                                                                                                                                                                                                           |   |                   |               |          |                  |          |   |                  |                     |                |                  |                      |   |                  |         |   |                  |            |   |                  |                         |   |                  |                     |   |                  |                              |    |                   |                                                                           |    |                   |                                                                     |    |                   |                   |
| 4  | Strongly agree                                                             |                                                                                                                                                                                                                                                                                       |                                                                                                                                                                                                                                                                                                                                                                                                                                                                                                                                                                                                                                                                                                                                                                                                                                                                                                                                                                                                                                           |   |                   |               |          |                  |          |   |                  |                     |                |                  |                      |   |                  |         |   |                  |            |   |                  |                         |   |                  |                     |   |                  |                              |    |                   |                                                                           |    |                   |                                                                     |    |                   |                   |

|    |                      |                                                                                                                                                                                                                                                                                               |                                                                                                                                                                                                                                                                                           |   |                      |   |                    |   |                      |   |                |   |                     |
|----|----------------------|-----------------------------------------------------------------------------------------------------------------------------------------------------------------------------------------------------------------------------------------------------------------------------------------------|-------------------------------------------------------------------------------------------------------------------------------------------------------------------------------------------------------------------------------------------------------------------------------------------|---|----------------------|---|--------------------|---|----------------------|---|----------------|---|---------------------|
| 67 | spread               | Spreading out recommended vaccines over several visits versus following the Advisory Committee on Immunization Practices (ACIP) and the Center for Disease Control and Prevention (CDC) recommended vaccine schedule is an acceptable approach to reducing parental stress about vaccinating. | radio (Matrix)<br><table border="1"> <tr><td>0</td><td>Strongly disagree</td></tr> <tr><td>1</td><td>Disagree</td></tr> <tr><td>2</td><td>Neutral</td></tr> <tr><td>3</td><td>Agree</td></tr> <tr><td>4</td><td>Strongly agree</td></tr> </table>                                         | 0 | Strongly disagree    | 1 | Disagree           | 2 | Neutral              | 3 | Agree          | 4 | Strongly agree      |
| 0  | Strongly disagree    |                                                                                                                                                                                                                                                                                               |                                                                                                                                                                                                                                                                                           |   |                      |   |                    |   |                      |   |                |   |                     |
| 1  | Disagree             |                                                                                                                                                                                                                                                                                               |                                                                                                                                                                                                                                                                                           |   |                      |   |                    |   |                      |   |                |   |                     |
| 2  | Neutral              |                                                                                                                                                                                                                                                                                               |                                                                                                                                                                                                                                                                                           |   |                      |   |                    |   |                      |   |                |   |                     |
| 3  | Agree                |                                                                                                                                                                                                                                                                                               |                                                                                                                                                                                                                                                                                           |   |                      |   |                    |   |                      |   |                |   |                     |
| 4  | Strongly agree       |                                                                                                                                                                                                                                                                                               |                                                                                                                                                                                                                                                                                           |   |                      |   |                    |   |                      |   |                |   |                     |
| 68 | requirements         | State and local vaccination requirements for school and daycare entry are important tools for reducing vaccine preventable diseases in the community.                                                                                                                                         | radio (Matrix)<br><table border="1"> <tr><td>0</td><td>Strongly disagree</td></tr> <tr><td>1</td><td>Disagree</td></tr> <tr><td>2</td><td>Neutral</td></tr> <tr><td>3</td><td>Agree</td></tr> <tr><td>4</td><td>Strongly agree</td></tr> </table>                                         | 0 | Strongly disagree    | 1 | Disagree           | 2 | Neutral              | 3 | Agree          | 4 | Strongly agree      |
| 0  | Strongly disagree    |                                                                                                                                                                                                                                                                                               |                                                                                                                                                                                                                                                                                           |   |                      |   |                    |   |                      |   |                |   |                     |
| 1  | Disagree             |                                                                                                                                                                                                                                                                                               |                                                                                                                                                                                                                                                                                           |   |                      |   |                    |   |                      |   |                |   |                     |
| 2  | Neutral              |                                                                                                                                                                                                                                                                                               |                                                                                                                                                                                                                                                                                           |   |                      |   |                    |   |                      |   |                |   |                     |
| 3  | Agree                |                                                                                                                                                                                                                                                                                               |                                                                                                                                                                                                                                                                                           |   |                      |   |                    |   |                      |   |                |   |                     |
| 4  | Strongly agree       |                                                                                                                                                                                                                                                                                               |                                                                                                                                                                                                                                                                                           |   |                      |   |                    |   |                      |   |                |   |                     |
| 69 | exemptions           | Parents and caregivers should have the right to request non-medical exemptions (philosophical, moral, and/or religious exemptions) from state and local vaccination requirements for school entry.                                                                                            | radio (Matrix)<br><table border="1"> <tr><td>0</td><td>Strongly disagree</td></tr> <tr><td>1</td><td>Disagree</td></tr> <tr><td>2</td><td>Neutral</td></tr> <tr><td>3</td><td>Agree</td></tr> <tr><td>4</td><td>Strongly agree</td></tr> </table>                                         | 0 | Strongly disagree    | 1 | Disagree           | 2 | Neutral              | 3 | Agree          | 4 | Strongly agree      |
| 0  | Strongly disagree    |                                                                                                                                                                                                                                                                                               |                                                                                                                                                                                                                                                                                           |   |                      |   |                    |   |                      |   |                |   |                     |
| 1  | Disagree             |                                                                                                                                                                                                                                                                                               |                                                                                                                                                                                                                                                                                           |   |                      |   |                    |   |                      |   |                |   |                     |
| 2  | Neutral              |                                                                                                                                                                                                                                                                                               |                                                                                                                                                                                                                                                                                           |   |                      |   |                    |   |                      |   |                |   |                     |
| 3  | Agree                |                                                                                                                                                                                                                                                                                               |                                                                                                                                                                                                                                                                                           |   |                      |   |                    |   |                      |   |                |   |                     |
| 4  | Strongly agree       |                                                                                                                                                                                                                                                                                               |                                                                                                                                                                                                                                                                                           |   |                      |   |                    |   |                      |   |                |   |                     |
| 70 | responsible          | As a healthcare worker, I believe that I am responsible for advocating the benefit of vaccines and educating patients on the diseases they prevent.                                                                                                                                           | radio (Matrix)<br><table border="1"> <tr><td>0</td><td>Strongly disagree</td></tr> <tr><td>1</td><td>Disagree</td></tr> <tr><td>2</td><td>Neutral</td></tr> <tr><td>3</td><td>Agree</td></tr> <tr><td>4</td><td>Strongly agree</td></tr> </table>                                         | 0 | Strongly disagree    | 1 | Disagree           | 2 | Neutral              | 3 | Agree          | 4 | Strongly agree      |
| 0  | Strongly disagree    |                                                                                                                                                                                                                                                                                               |                                                                                                                                                                                                                                                                                           |   |                      |   |                    |   |                      |   |                |   |                     |
| 1  | Disagree             |                                                                                                                                                                                                                                                                                               |                                                                                                                                                                                                                                                                                           |   |                      |   |                    |   |                      |   |                |   |                     |
| 2  | Neutral              |                                                                                                                                                                                                                                                                                               |                                                                                                                                                                                                                                                                                           |   |                      |   |                    |   |                      |   |                |   |                     |
| 3  | Agree                |                                                                                                                                                                                                                                                                                               |                                                                                                                                                                                                                                                                                           |   |                      |   |                    |   |                      |   |                |   |                     |
| 4  | Strongly agree       |                                                                                                                                                                                                                                                                                               |                                                                                                                                                                                                                                                                                           |   |                      |   |                    |   |                      |   |                |   |                     |
| 71 | strongrec            | As a healthcare worker, I believe that my strong recommendation for a vaccination will impact a patient's decision on whether or not to vaccinate.                                                                                                                                            | radio (Matrix)<br><table border="1"> <tr><td>0</td><td>Strongly disagree</td></tr> <tr><td>1</td><td>Disagree</td></tr> <tr><td>2</td><td>Neutral</td></tr> <tr><td>3</td><td>Agree</td></tr> <tr><td>4</td><td>Strongly agree</td></tr> </table>                                         | 0 | Strongly disagree    | 1 | Disagree           | 2 | Neutral              | 3 | Agree          | 4 | Strongly agree      |
| 0  | Strongly disagree    |                                                                                                                                                                                                                                                                                               |                                                                                                                                                                                                                                                                                           |   |                      |   |                    |   |                      |   |                |   |                     |
| 1  | Disagree             |                                                                                                                                                                                                                                                                                               |                                                                                                                                                                                                                                                                                           |   |                      |   |                    |   |                      |   |                |   |                     |
| 2  | Neutral              |                                                                                                                                                                                                                                                                                               |                                                                                                                                                                                                                                                                                           |   |                      |   |                    |   |                      |   |                |   |                     |
| 3  | Agree                |                                                                                                                                                                                                                                                                                               |                                                                                                                                                                                                                                                                                           |   |                      |   |                    |   |                      |   |                |   |                     |
| 4  | Strongly agree       |                                                                                                                                                                                                                                                                                               |                                                                                                                                                                                                                                                                                           |   |                      |   |                    |   |                      |   |                |   |                     |
| 72 | authorization        | I believe that the COVID-19 vaccine, with the emergency use approval for children, is safe for all to use.                                                                                                                                                                                    | radio (Matrix)<br><table border="1"> <tr><td>0</td><td>Strongly disagree</td></tr> <tr><td>1</td><td>Disagree</td></tr> <tr><td>2</td><td>Neutral</td></tr> <tr><td>3</td><td>Agree</td></tr> <tr><td>4</td><td>Strongly agree</td></tr> </table>                                         | 0 | Strongly disagree    | 1 | Disagree           | 2 | Neutral              | 3 | Agree          | 4 | Strongly agree      |
| 0  | Strongly disagree    |                                                                                                                                                                                                                                                                                               |                                                                                                                                                                                                                                                                                           |   |                      |   |                    |   |                      |   |                |   |                     |
| 1  | Disagree             |                                                                                                                                                                                                                                                                                               |                                                                                                                                                                                                                                                                                           |   |                      |   |                    |   |                      |   |                |   |                     |
| 2  | Neutral              |                                                                                                                                                                                                                                                                                               |                                                                                                                                                                                                                                                                                           |   |                      |   |                    |   |                      |   |                |   |                     |
| 3  | Agree                |                                                                                                                                                                                                                                                                                               |                                                                                                                                                                                                                                                                                           |   |                      |   |                    |   |                      |   |                |   |                     |
| 4  | Strongly agree       |                                                                                                                                                                                                                                                                                               |                                                                                                                                                                                                                                                                                           |   |                      |   |                    |   |                      |   |                |   |                     |
| 73 | beliefs              | I believe and trust the words of my fellow health care workers regarding the safety of the COVID-19 vaccine.                                                                                                                                                                                  | radio (Matrix)<br><table border="1"> <tr><td>0</td><td>Strongly disagree</td></tr> <tr><td>1</td><td>Disagree</td></tr> <tr><td>2</td><td>Neutral</td></tr> <tr><td>3</td><td>Agree</td></tr> <tr><td>4</td><td>Strongly agree</td></tr> </table>                                         | 0 | Strongly disagree    | 1 | Disagree           | 2 | Neutral              | 3 | Agree          | 4 | Strongly agree      |
| 0  | Strongly disagree    |                                                                                                                                                                                                                                                                                               |                                                                                                                                                                                                                                                                                           |   |                      |   |                    |   |                      |   |                |   |                     |
| 1  | Disagree             |                                                                                                                                                                                                                                                                                               |                                                                                                                                                                                                                                                                                           |   |                      |   |                    |   |                      |   |                |   |                     |
| 2  | Neutral              |                                                                                                                                                                                                                                                                                               |                                                                                                                                                                                                                                                                                           |   |                      |   |                    |   |                      |   |                |   |                     |
| 3  | Agree                |                                                                                                                                                                                                                                                                                               |                                                                                                                                                                                                                                                                                           |   |                      |   |                    |   |                      |   |                |   |                     |
| 4  | Strongly agree       |                                                                                                                                                                                                                                                                                               |                                                                                                                                                                                                                                                                                           |   |                      |   |                    |   |                      |   |                |   |                     |
| 74 | important            | Section Header: <i>Section 2: Please rate the following statements based on the level of importance to you.</i><br>Getting my COVID-19 vaccine is important to me.                                                                                                                            | radio (Matrix)<br><table border="1"> <tr><td>1</td><td>Not important at all</td></tr> <tr><td>2</td><td>Slightly important</td></tr> <tr><td>3</td><td>Moderately important</td></tr> <tr><td>4</td><td>Very important</td></tr> <tr><td>5</td><td>Extremely important</td></tr> </table> | 1 | Not important at all | 2 | Slightly important | 3 | Moderately important | 4 | Very important | 5 | Extremely important |
| 1  | Not important at all |                                                                                                                                                                                                                                                                                               |                                                                                                                                                                                                                                                                                           |   |                      |   |                    |   |                      |   |                |   |                     |
| 2  | Slightly important   |                                                                                                                                                                                                                                                                                               |                                                                                                                                                                                                                                                                                           |   |                      |   |                    |   |                      |   |                |   |                     |
| 3  | Moderately important |                                                                                                                                                                                                                                                                                               |                                                                                                                                                                                                                                                                                           |   |                      |   |                    |   |                      |   |                |   |                     |
| 4  | Very important       |                                                                                                                                                                                                                                                                                               |                                                                                                                                                                                                                                                                                           |   |                      |   |                    |   |                      |   |                |   |                     |
| 5  | Extremely important  |                                                                                                                                                                                                                                                                                               |                                                                                                                                                                                                                                                                                           |   |                      |   |                    |   |                      |   |                |   |                     |

|    |                      |                                                                                                                                            |                                                                                                                                                                                                                                                                                                                                      |   |                      |   |                    |   |                      |   |                |   |                     |   |                |
|----|----------------------|--------------------------------------------------------------------------------------------------------------------------------------------|--------------------------------------------------------------------------------------------------------------------------------------------------------------------------------------------------------------------------------------------------------------------------------------------------------------------------------------|---|----------------------|---|--------------------|---|----------------------|---|----------------|---|---------------------|---|----------------|
| 75 | encouragehcw         | It is important to actively engage and encourage all healthcare workers to be immunized with the COVID-19 vaccine.                         | radio (Matrix)<br><table border="1"> <tr><td>1</td><td>Not important at all</td></tr> <tr><td>2</td><td>Slightly important</td></tr> <tr><td>3</td><td>Moderately important</td></tr> <tr><td>4</td><td>Very important</td></tr> <tr><td>5</td><td>Extremely important</td></tr> </table>                                            | 1 | Not important at all | 2 | Slightly important | 3 | Moderately important | 4 | Very important | 5 | Extremely important |   |                |
| 1  | Not important at all |                                                                                                                                            |                                                                                                                                                                                                                                                                                                                                      |   |                      |   |                    |   |                      |   |                |   |                     |   |                |
| 2  | Slightly important   |                                                                                                                                            |                                                                                                                                                                                                                                                                                                                                      |   |                      |   |                    |   |                      |   |                |   |                     |   |                |
| 3  | Moderately important |                                                                                                                                            |                                                                                                                                                                                                                                                                                                                                      |   |                      |   |                    |   |                      |   |                |   |                     |   |                |
| 4  | Very important       |                                                                                                                                            |                                                                                                                                                                                                                                                                                                                                      |   |                      |   |                    |   |                      |   |                |   |                     |   |                |
| 5  | Extremely important  |                                                                                                                                            |                                                                                                                                                                                                                                                                                                                                      |   |                      |   |                    |   |                      |   |                |   |                     |   |                |
| 76 | encouragepat         | It is important to actively engage and encourage all patients to be immunized with the COVID-19 vaccine.                                   | radio (Matrix)<br><table border="1"> <tr><td>1</td><td>Not important at all</td></tr> <tr><td>2</td><td>Slightly important</td></tr> <tr><td>3</td><td>Moderately important</td></tr> <tr><td>4</td><td>Very important</td></tr> <tr><td>5</td><td>Extremely important</td></tr> </table>                                            | 1 | Not important at all | 2 | Slightly important | 3 | Moderately important | 4 | Very important | 5 | Extremely important |   |                |
| 1  | Not important at all |                                                                                                                                            |                                                                                                                                                                                                                                                                                                                                      |   |                      |   |                    |   |                      |   |                |   |                     |   |                |
| 2  | Slightly important   |                                                                                                                                            |                                                                                                                                                                                                                                                                                                                                      |   |                      |   |                    |   |                      |   |                |   |                     |   |                |
| 3  | Moderately important |                                                                                                                                            |                                                                                                                                                                                                                                                                                                                                      |   |                      |   |                    |   |                      |   |                |   |                     |   |                |
| 4  | Very important       |                                                                                                                                            |                                                                                                                                                                                                                                                                                                                                      |   |                      |   |                    |   |                      |   |                |   |                     |   |                |
| 5  | Extremely important  |                                                                                                                                            |                                                                                                                                                                                                                                                                                                                                      |   |                      |   |                    |   |                      |   |                |   |                     |   |                |
| 77 | discussbenefit       | Section Header: <i>Section 3: Rate the following statements based on your level of confidence.</i><br>Discussing the benefits of vaccines. | radio (Matrix)<br><table border="1"> <tr><td>1</td><td>Not confident at all</td></tr> <tr><td>2</td><td>Somewhat confident</td></tr> <tr><td>3</td><td>Moderately confident</td></tr> <tr><td>4</td><td>Very confident</td></tr> <tr><td>5</td><td>Extremely confident</td></tr> <tr><td>6</td><td>Not applicable</td></tr> </table> | 1 | Not confident at all | 2 | Somewhat confident | 3 | Moderately confident | 4 | Very confident | 5 | Extremely confident | 6 | Not applicable |
| 1  | Not confident at all |                                                                                                                                            |                                                                                                                                                                                                                                                                                                                                      |   |                      |   |                    |   |                      |   |                |   |                     |   |                |
| 2  | Somewhat confident   |                                                                                                                                            |                                                                                                                                                                                                                                                                                                                                      |   |                      |   |                    |   |                      |   |                |   |                     |   |                |
| 3  | Moderately confident |                                                                                                                                            |                                                                                                                                                                                                                                                                                                                                      |   |                      |   |                    |   |                      |   |                |   |                     |   |                |
| 4  | Very confident       |                                                                                                                                            |                                                                                                                                                                                                                                                                                                                                      |   |                      |   |                    |   |                      |   |                |   |                     |   |                |
| 5  | Extremely confident  |                                                                                                                                            |                                                                                                                                                                                                                                                                                                                                      |   |                      |   |                    |   |                      |   |                |   |                     |   |                |
| 6  | Not applicable       |                                                                                                                                            |                                                                                                                                                                                                                                                                                                                                      |   |                      |   |                    |   |                      |   |                |   |                     |   |                |
| 78 | discussrisk          | Discussing the risks of vaccines.                                                                                                          | radio (Matrix)<br><table border="1"> <tr><td>1</td><td>Not confident at all</td></tr> <tr><td>2</td><td>Somewhat confident</td></tr> <tr><td>3</td><td>Moderately confident</td></tr> <tr><td>4</td><td>Very confident</td></tr> <tr><td>5</td><td>Extremely confident</td></tr> <tr><td>6</td><td>Not applicable</td></tr> </table> | 1 | Not confident at all | 2 | Somewhat confident | 3 | Moderately confident | 4 | Very confident | 5 | Extremely confident | 6 | Not applicable |
| 1  | Not confident at all |                                                                                                                                            |                                                                                                                                                                                                                                                                                                                                      |   |                      |   |                    |   |                      |   |                |   |                     |   |                |
| 2  | Somewhat confident   |                                                                                                                                            |                                                                                                                                                                                                                                                                                                                                      |   |                      |   |                    |   |                      |   |                |   |                     |   |                |
| 3  | Moderately confident |                                                                                                                                            |                                                                                                                                                                                                                                                                                                                                      |   |                      |   |                    |   |                      |   |                |   |                     |   |                |
| 4  | Very confident       |                                                                                                                                            |                                                                                                                                                                                                                                                                                                                                      |   |                      |   |                    |   |                      |   |                |   |                     |   |                |
| 5  | Extremely confident  |                                                                                                                                            |                                                                                                                                                                                                                                                                                                                                      |   |                      |   |                    |   |                      |   |                |   |                     |   |                |
| 6  | Not applicable       |                                                                                                                                            |                                                                                                                                                                                                                                                                                                                                      |   |                      |   |                    |   |                      |   |                |   |                     |   |                |
| 79 | discussdialogue      | Establishing ongoing dialogue about vaccines.                                                                                              | radio (Matrix)<br><table border="1"> <tr><td>1</td><td>Not confident at all</td></tr> <tr><td>2</td><td>Somewhat confident</td></tr> <tr><td>3</td><td>Moderately confident</td></tr> <tr><td>4</td><td>Very confident</td></tr> <tr><td>5</td><td>Extremely confident</td></tr> <tr><td>6</td><td>Not applicable</td></tr> </table> | 1 | Not confident at all | 2 | Somewhat confident | 3 | Moderately confident | 4 | Very confident | 5 | Extremely confident | 6 | Not applicable |
| 1  | Not confident at all |                                                                                                                                            |                                                                                                                                                                                                                                                                                                                                      |   |                      |   |                    |   |                      |   |                |   |                     |   |                |
| 2  | Somewhat confident   |                                                                                                                                            |                                                                                                                                                                                                                                                                                                                                      |   |                      |   |                    |   |                      |   |                |   |                     |   |                |
| 3  | Moderately confident |                                                                                                                                            |                                                                                                                                                                                                                                                                                                                                      |   |                      |   |                    |   |                      |   |                |   |                     |   |                |
| 4  | Very confident       |                                                                                                                                            |                                                                                                                                                                                                                                                                                                                                      |   |                      |   |                    |   |                      |   |                |   |                     |   |                |
| 5  | Extremely confident  |                                                                                                                                            |                                                                                                                                                                                                                                                                                                                                      |   |                      |   |                    |   |                      |   |                |   |                     |   |                |
| 6  | Not applicable       |                                                                                                                                            |                                                                                                                                                                                                                                                                                                                                      |   |                      |   |                    |   |                      |   |                |   |                     |   |                |
| 80 | discussafety         | Discussing concerns about the safety of COVID-19 vaccines.                                                                                 | radio (Matrix)<br><table border="1"> <tr><td>1</td><td>Not confident at all</td></tr> <tr><td>2</td><td>Somewhat confident</td></tr> <tr><td>3</td><td>Moderately confident</td></tr> <tr><td>4</td><td>Very confident</td></tr> <tr><td>5</td><td>Extremely confident</td></tr> <tr><td>6</td><td>Not applicable</td></tr> </table> | 1 | Not confident at all | 2 | Somewhat confident | 3 | Moderately confident | 4 | Very confident | 5 | Extremely confident | 6 | Not applicable |
| 1  | Not confident at all |                                                                                                                                            |                                                                                                                                                                                                                                                                                                                                      |   |                      |   |                    |   |                      |   |                |   |                     |   |                |
| 2  | Somewhat confident   |                                                                                                                                            |                                                                                                                                                                                                                                                                                                                                      |   |                      |   |                    |   |                      |   |                |   |                     |   |                |
| 3  | Moderately confident |                                                                                                                                            |                                                                                                                                                                                                                                                                                                                                      |   |                      |   |                    |   |                      |   |                |   |                     |   |                |
| 4  | Very confident       |                                                                                                                                            |                                                                                                                                                                                                                                                                                                                                      |   |                      |   |                    |   |                      |   |                |   |                     |   |                |
| 5  | Extremely confident  |                                                                                                                                            |                                                                                                                                                                                                                                                                                                                                      |   |                      |   |                    |   |                      |   |                |   |                     |   |                |
| 6  | Not applicable       |                                                                                                                                            |                                                                                                                                                                                                                                                                                                                                      |   |                      |   |                    |   |                      |   |                |   |                     |   |                |
| 81 | discusseffectiveness | Discussing concerns about the effectiveness of COVID-19 vaccines.                                                                          | radio (Matrix)<br><table border="1"> <tr><td>1</td><td>Not confident at all</td></tr> <tr><td>2</td><td>Somewhat confident</td></tr> <tr><td>3</td><td>Moderately confident</td></tr> <tr><td>4</td><td>Very confident</td></tr> <tr><td>5</td><td>Extremely confident</td></tr> <tr><td>6</td><td>Not applicable</td></tr> </table> | 1 | Not confident at all | 2 | Somewhat confident | 3 | Moderately confident | 4 | Very confident | 5 | Extremely confident | 6 | Not applicable |
| 1  | Not confident at all |                                                                                                                                            |                                                                                                                                                                                                                                                                                                                                      |   |                      |   |                    |   |                      |   |                |   |                     |   |                |
| 2  | Somewhat confident   |                                                                                                                                            |                                                                                                                                                                                                                                                                                                                                      |   |                      |   |                    |   |                      |   |                |   |                     |   |                |
| 3  | Moderately confident |                                                                                                                                            |                                                                                                                                                                                                                                                                                                                                      |   |                      |   |                    |   |                      |   |                |   |                     |   |                |
| 4  | Very confident       |                                                                                                                                            |                                                                                                                                                                                                                                                                                                                                      |   |                      |   |                    |   |                      |   |                |   |                     |   |                |
| 5  | Extremely confident  |                                                                                                                                            |                                                                                                                                                                                                                                                                                                                                      |   |                      |   |                    |   |                      |   |                |   |                     |   |                |
| 6  | Not applicable       |                                                                                                                                            |                                                                                                                                                                                                                                                                                                                                      |   |                      |   |                    |   |                      |   |                |   |                     |   |                |

|    |                      |                                                                                                                                                                                                                                       |                                                                                                                                                                                                                                                                                                                                      |   |                      |   |                    |   |                      |   |                |   |                     |   |                |
|----|----------------------|---------------------------------------------------------------------------------------------------------------------------------------------------------------------------------------------------------------------------------------|--------------------------------------------------------------------------------------------------------------------------------------------------------------------------------------------------------------------------------------------------------------------------------------------------------------------------------------|---|----------------------|---|--------------------|---|----------------------|---|----------------|---|---------------------|---|----------------|
| 82 | discussinfertility   | Discussing concerns about COVID-19 vaccines and infertility.                                                                                                                                                                          | radio (Matrix)<br><table border="1"> <tr><td>1</td><td>Not confident at all</td></tr> <tr><td>2</td><td>Somewhat confident</td></tr> <tr><td>3</td><td>Moderately confident</td></tr> <tr><td>4</td><td>Very confident</td></tr> <tr><td>5</td><td>Extremely confident</td></tr> <tr><td>6</td><td>Not applicable</td></tr> </table> | 1 | Not confident at all | 2 | Somewhat confident | 3 | Moderately confident | 4 | Very confident | 5 | Extremely confident | 6 | Not applicable |
| 1  | Not confident at all |                                                                                                                                                                                                                                       |                                                                                                                                                                                                                                                                                                                                      |   |                      |   |                    |   |                      |   |                |   |                     |   |                |
| 2  | Somewhat confident   |                                                                                                                                                                                                                                       |                                                                                                                                                                                                                                                                                                                                      |   |                      |   |                    |   |                      |   |                |   |                     |   |                |
| 3  | Moderately confident |                                                                                                                                                                                                                                       |                                                                                                                                                                                                                                                                                                                                      |   |                      |   |                    |   |                      |   |                |   |                     |   |                |
| 4  | Very confident       |                                                                                                                                                                                                                                       |                                                                                                                                                                                                                                                                                                                                      |   |                      |   |                    |   |                      |   |                |   |                     |   |                |
| 5  | Extremely confident  |                                                                                                                                                                                                                                       |                                                                                                                                                                                                                                                                                                                                      |   |                      |   |                    |   |                      |   |                |   |                     |   |                |
| 6  | Not applicable       |                                                                                                                                                                                                                                       |                                                                                                                                                                                                                                                                                                                                      |   |                      |   |                    |   |                      |   |                |   |                     |   |                |
| 83 | discussmyocarditis   | Discussing concerns about COVID-19 vaccines and myocarditis (heart inflammation).                                                                                                                                                     | radio (Matrix)<br><table border="1"> <tr><td>1</td><td>Not confident at all</td></tr> <tr><td>2</td><td>Somewhat confident</td></tr> <tr><td>3</td><td>Moderately confident</td></tr> <tr><td>4</td><td>Very confident</td></tr> <tr><td>5</td><td>Extremely confident</td></tr> <tr><td>6</td><td>Not applicable</td></tr> </table> | 1 | Not confident at all | 2 | Somewhat confident | 3 | Moderately confident | 4 | Very confident | 5 | Extremely confident | 6 | Not applicable |
| 1  | Not confident at all |                                                                                                                                                                                                                                       |                                                                                                                                                                                                                                                                                                                                      |   |                      |   |                    |   |                      |   |                |   |                     |   |                |
| 2  | Somewhat confident   |                                                                                                                                                                                                                                       |                                                                                                                                                                                                                                                                                                                                      |   |                      |   |                    |   |                      |   |                |   |                     |   |                |
| 3  | Moderately confident |                                                                                                                                                                                                                                       |                                                                                                                                                                                                                                                                                                                                      |   |                      |   |                    |   |                      |   |                |   |                     |   |                |
| 4  | Very confident       |                                                                                                                                                                                                                                       |                                                                                                                                                                                                                                                                                                                                      |   |                      |   |                    |   |                      |   |                |   |                     |   |                |
| 5  | Extremely confident  |                                                                                                                                                                                                                                       |                                                                                                                                                                                                                                                                                                                                      |   |                      |   |                    |   |                      |   |                |   |                     |   |                |
| 6  | Not applicable       |                                                                                                                                                                                                                                       |                                                                                                                                                                                                                                                                                                                                      |   |                      |   |                    |   |                      |   |                |   |                     |   |                |
| 84 | discussimmune        | Discussing concerns about COVID-19 vaccines and whether or not they overwhelm the immune system.                                                                                                                                      | radio (Matrix)<br><table border="1"> <tr><td>1</td><td>Not confident at all</td></tr> <tr><td>2</td><td>Somewhat confident</td></tr> <tr><td>3</td><td>Moderately confident</td></tr> <tr><td>4</td><td>Very confident</td></tr> <tr><td>5</td><td>Extremely confident</td></tr> <tr><td>6</td><td>Not applicable</td></tr> </table> | 1 | Not confident at all | 2 | Somewhat confident | 3 | Moderately confident | 4 | Very confident | 5 | Extremely confident | 6 | Not applicable |
| 1  | Not confident at all |                                                                                                                                                                                                                                       |                                                                                                                                                                                                                                                                                                                                      |   |                      |   |                    |   |                      |   |                |   |                     |   |                |
| 2  | Somewhat confident   |                                                                                                                                                                                                                                       |                                                                                                                                                                                                                                                                                                                                      |   |                      |   |                    |   |                      |   |                |   |                     |   |                |
| 3  | Moderately confident |                                                                                                                                                                                                                                       |                                                                                                                                                                                                                                                                                                                                      |   |                      |   |                    |   |                      |   |                |   |                     |   |                |
| 4  | Very confident       |                                                                                                                                                                                                                                       |                                                                                                                                                                                                                                                                                                                                      |   |                      |   |                    |   |                      |   |                |   |                     |   |                |
| 5  | Extremely confident  |                                                                                                                                                                                                                                       |                                                                                                                                                                                                                                                                                                                                      |   |                      |   |                    |   |                      |   |                |   |                     |   |                |
| 6  | Not applicable       |                                                                                                                                                                                                                                       |                                                                                                                                                                                                                                                                                                                                      |   |                      |   |                    |   |                      |   |                |   |                     |   |                |
| 85 | discussminority      | Discussing the COVID-19 vaccine with someone from a underrepresented racial or ethnic group.                                                                                                                                          | radio (Matrix)<br><table border="1"> <tr><td>1</td><td>Not confident at all</td></tr> <tr><td>2</td><td>Somewhat confident</td></tr> <tr><td>3</td><td>Moderately confident</td></tr> <tr><td>4</td><td>Very confident</td></tr> <tr><td>5</td><td>Extremely confident</td></tr> <tr><td>6</td><td>Not applicable</td></tr> </table> | 1 | Not confident at all | 2 | Somewhat confident | 3 | Moderately confident | 4 | Very confident | 5 | Extremely confident | 6 | Not applicable |
| 1  | Not confident at all |                                                                                                                                                                                                                                       |                                                                                                                                                                                                                                                                                                                                      |   |                      |   |                    |   |                      |   |                |   |                     |   |                |
| 2  | Somewhat confident   |                                                                                                                                                                                                                                       |                                                                                                                                                                                                                                                                                                                                      |   |                      |   |                    |   |                      |   |                |   |                     |   |                |
| 3  | Moderately confident |                                                                                                                                                                                                                                       |                                                                                                                                                                                                                                                                                                                                      |   |                      |   |                    |   |                      |   |                |   |                     |   |                |
| 4  | Very confident       |                                                                                                                                                                                                                                       |                                                                                                                                                                                                                                                                                                                                      |   |                      |   |                    |   |                      |   |                |   |                     |   |                |
| 5  | Extremely confident  |                                                                                                                                                                                                                                       |                                                                                                                                                                                                                                                                                                                                      |   |                      |   |                    |   |                      |   |                |   |                     |   |                |
| 6  | Not applicable       |                                                                                                                                                                                                                                       |                                                                                                                                                                                                                                                                                                                                      |   |                      |   |                    |   |                      |   |                |   |                     |   |                |
| 86 | discuss_immunization | Discussing the COVID-19 vaccine with a parent about their decision to vaccinate their child.                                                                                                                                          | radio (Matrix)<br><table border="1"> <tr><td>1</td><td>Not confident at all</td></tr> <tr><td>2</td><td>Somewhat confident</td></tr> <tr><td>3</td><td>Moderately confident</td></tr> <tr><td>4</td><td>Very confident</td></tr> <tr><td>5</td><td>Extremely confident</td></tr> <tr><td>6</td><td>Not applicable</td></tr> </table> | 1 | Not confident at all | 2 | Somewhat confident | 3 | Moderately confident | 4 | Very confident | 5 | Extremely confident | 6 | Not applicable |
| 1  | Not confident at all |                                                                                                                                                                                                                                       |                                                                                                                                                                                                                                                                                                                                      |   |                      |   |                    |   |                      |   |                |   |                     |   |                |
| 2  | Somewhat confident   |                                                                                                                                                                                                                                       |                                                                                                                                                                                                                                                                                                                                      |   |                      |   |                    |   |                      |   |                |   |                     |   |                |
| 3  | Moderately confident |                                                                                                                                                                                                                                       |                                                                                                                                                                                                                                                                                                                                      |   |                      |   |                    |   |                      |   |                |   |                     |   |                |
| 4  | Very confident       |                                                                                                                                                                                                                                       |                                                                                                                                                                                                                                                                                                                                      |   |                      |   |                    |   |                      |   |                |   |                     |   |                |
| 5  | Extremely confident  |                                                                                                                                                                                                                                       |                                                                                                                                                                                                                                                                                                                                      |   |                      |   |                    |   |                      |   |                |   |                     |   |                |
| 6  | Not applicable       |                                                                                                                                                                                                                                       |                                                                                                                                                                                                                                                                                                                                      |   |                      |   |                    |   |                      |   |                |   |                     |   |                |
| 87 | myocarditis          | Section Header: Section 4: Please respond to the following statements with either TRUE or FALSE or NOT SURE.<br>Current scientific evidence supports associations between the COVID-19 vaccines and myocarditis (heart inflammation). | radio<br><table border="1"> <tr><td>1</td><td>True</td></tr> <tr><td>2</td><td>False</td></tr> <tr><td>3</td><td>Not sure</td></tr> </table><br>Custom alignment: RH                                                                                                                                                                 | 1 | True                 | 2 | False              | 3 | Not sure             |   |                |   |                     |   |                |
| 1  | True                 |                                                                                                                                                                                                                                       |                                                                                                                                                                                                                                                                                                                                      |   |                      |   |                    |   |                      |   |                |   |                     |   |                |
| 2  | False                |                                                                                                                                                                                                                                       |                                                                                                                                                                                                                                                                                                                                      |   |                      |   |                    |   |                      |   |                |   |                     |   |                |
| 3  | Not sure             |                                                                                                                                                                                                                                       |                                                                                                                                                                                                                                                                                                                                      |   |                      |   |                    |   |                      |   |                |   |                     |   |                |
| 88 | infertility          | Current scientific evidence supports associations between COVID-19 vaccines and infertility.                                                                                                                                          | radio<br><table border="1"> <tr><td>1</td><td>True</td></tr> <tr><td>2</td><td>False</td></tr> <tr><td>3</td><td>Not sure</td></tr> </table><br>Custom alignment: RH                                                                                                                                                                 | 1 | True                 | 2 | False              | 3 | Not sure             |   |                |   |                     |   |                |
| 1  | True                 |                                                                                                                                                                                                                                       |                                                                                                                                                                                                                                                                                                                                      |   |                      |   |                    |   |                      |   |                |   |                     |   |                |
| 2  | False                |                                                                                                                                                                                                                                       |                                                                                                                                                                                                                                                                                                                                      |   |                      |   |                    |   |                      |   |                |   |                     |   |                |
| 3  | Not sure             |                                                                                                                                                                                                                                       |                                                                                                                                                                                                                                                                                                                                      |   |                      |   |                    |   |                      |   |                |   |                     |   |                |

|    |                                                                                                                                                                                                                                                                     |                                                                                                                                                                                                                                                                 |                                                                                                                                                                                                                                                                                                                                                                                            |   |      |   |       |   |            |   |   |   |   |   |   |   |   |   |   |   |   |    |   |    |    |
|----|---------------------------------------------------------------------------------------------------------------------------------------------------------------------------------------------------------------------------------------------------------------------|-----------------------------------------------------------------------------------------------------------------------------------------------------------------------------------------------------------------------------------------------------------------|--------------------------------------------------------------------------------------------------------------------------------------------------------------------------------------------------------------------------------------------------------------------------------------------------------------------------------------------------------------------------------------------|---|------|---|-------|---|------------|---|---|---|---|---|---|---|---|---|---|---|---|----|---|----|----|
| 89 | miscarriage                                                                                                                                                                                                                                                         | Current scientific evidence supports associations between COVID-19 vaccines and miscarriage.                                                                                                                                                                    | radio<br><table border="1"> <tr><td>1</td><td>True</td></tr> <tr><td>2</td><td>False</td></tr> <tr><td>3</td><td>Not sure</td></tr> </table> <p>Custom alignment: RH</p>                                                                                                                                                                                                                   | 1 | True | 2 | False | 3 | Not sure   |   |   |   |   |   |   |   |   |   |   |   |   |    |   |    |    |
| 1  | True                                                                                                                                                                                                                                                                |                                                                                                                                                                                                                                                                 |                                                                                                                                                                                                                                                                                                                                                                                            |   |      |   |       |   |            |   |   |   |   |   |   |   |   |   |   |   |   |    |   |    |    |
| 2  | False                                                                                                                                                                                                                                                               |                                                                                                                                                                                                                                                                 |                                                                                                                                                                                                                                                                                                                                                                                            |   |      |   |       |   |            |   |   |   |   |   |   |   |   |   |   |   |   |    |   |    |    |
| 3  | Not sure                                                                                                                                                                                                                                                            |                                                                                                                                                                                                                                                                 |                                                                                                                                                                                                                                                                                                                                                                                            |   |      |   |       |   |            |   |   |   |   |   |   |   |   |   |   |   |   |    |   |    |    |
| 90 | dna                                                                                                                                                                                                                                                                 | COVID-19 mRNA-based vaccines can alter your DNA.                                                                                                                                                                                                                | radio<br><table border="1"> <tr><td>1</td><td>True</td></tr> <tr><td>2</td><td>False</td></tr> <tr><td>3</td><td>Not sure</td></tr> </table> <p>Custom alignment: RH</p>                                                                                                                                                                                                                   | 1 | True | 2 | False | 3 | Not sure   |   |   |   |   |   |   |   |   |   |   |   |   |    |   |    |    |
| 1  | True                                                                                                                                                                                                                                                                |                                                                                                                                                                                                                                                                 |                                                                                                                                                                                                                                                                                                                                                                                            |   |      |   |       |   |            |   |   |   |   |   |   |   |   |   |   |   |   |    |   |    |    |
| 2  | False                                                                                                                                                                                                                                                               |                                                                                                                                                                                                                                                                 |                                                                                                                                                                                                                                                                                                                                                                                            |   |      |   |       |   |            |   |   |   |   |   |   |   |   |   |   |   |   |    |   |    |    |
| 3  | Not sure                                                                                                                                                                                                                                                            |                                                                                                                                                                                                                                                                 |                                                                                                                                                                                                                                                                                                                                                                                            |   |      |   |       |   |            |   |   |   |   |   |   |   |   |   |   |   |   |    |   |    |    |
| 91 | minority                                                                                                                                                                                                                                                            | Underrepresented racial and ethnic groups are more likely to be hesitant about COVID-19 vaccines.                                                                                                                                                               | radio<br><table border="1"> <tr><td>1</td><td>True</td></tr> <tr><td>2</td><td>False</td></tr> <tr><td>3</td><td>Not sure</td></tr> </table> <p>Custom alignment: RH</p>                                                                                                                                                                                                                   | 1 | True | 2 | False | 3 | Not sure   |   |   |   |   |   |   |   |   |   |   |   |   |    |   |    |    |
| 1  | True                                                                                                                                                                                                                                                                |                                                                                                                                                                                                                                                                 |                                                                                                                                                                                                                                                                                                                                                                                            |   |      |   |       |   |            |   |   |   |   |   |   |   |   |   |   |   |   |    |   |    |    |
| 2  | False                                                                                                                                                                                                                                                               |                                                                                                                                                                                                                                                                 |                                                                                                                                                                                                                                                                                                                                                                                            |   |      |   |       |   |            |   |   |   |   |   |   |   |   |   |   |   |   |    |   |    |    |
| 3  | Not sure                                                                                                                                                                                                                                                            |                                                                                                                                                                                                                                                                 |                                                                                                                                                                                                                                                                                                                                                                                            |   |      |   |       |   |            |   |   |   |   |   |   |   |   |   |   |   |   |    |   |    |    |
| 92 | immuneresponse                                                                                                                                                                                                                                                      | Vaccines interact with the immune system and often produce an immune response similar to that produced by the natural infection, but they do not subject the recipient to the disease and its potential complications.                                          | radio<br><table border="1"> <tr><td>1</td><td>True</td></tr> <tr><td>2</td><td>False</td></tr> <tr><td>3</td><td>Not sure</td></tr> </table> <p>Custom alignment: RH</p>                                                                                                                                                                                                                   | 1 | True | 2 | False | 3 | Not sure   |   |   |   |   |   |   |   |   |   |   |   |   |    |   |    |    |
| 1  | True                                                                                                                                                                                                                                                                |                                                                                                                                                                                                                                                                 |                                                                                                                                                                                                                                                                                                                                                                                            |   |      |   |       |   |            |   |   |   |   |   |   |   |   |   |   |   |   |    |   |    |    |
| 2  | False                                                                                                                                                                                                                                                               |                                                                                                                                                                                                                                                                 |                                                                                                                                                                                                                                                                                                                                                                                            |   |      |   |       |   |            |   |   |   |   |   |   |   |   |   |   |   |   |    |   |    |    |
| 3  | Not sure                                                                                                                                                                                                                                                            |                                                                                                                                                                                                                                                                 |                                                                                                                                                                                                                                                                                                                                                                                            |   |      |   |       |   |            |   |   |   |   |   |   |   |   |   |   |   |   |    |   |    |    |
| 93 | pacv_1delay<br><br>Show the field ONLY if:<br>[parentguardian] = '1' or [child_1] = '2' or [child_1] = '3' or [child_2] = '2' or [child_2] = '3' or [child_3] = '2' or [child_3] = '3' or [child_4] = '2' or [child_4] = '3' or [child_5] = '2' or [child_5] = '3'  | Section Header: <i>Section 5: For parents of children 17 years old or younger, please answer the questions below.</i><br><br>Have you ever delayed having your child get a shot (not including flu/COVID-19 vaccine) for reasons other than illness or allergy? | radio<br><table border="1"> <tr><td>1</td><td>Yes</td></tr> <tr><td>2</td><td>No</td></tr> <tr><td>3</td><td>Don't know</td></tr> </table> <p>Custom alignment: RH<br/>Question number: 1</p>                                                                                                                                                                                              | 1 | Yes  | 2 | No    | 3 | Don't know |   |   |   |   |   |   |   |   |   |   |   |   |    |   |    |    |
| 1  | Yes                                                                                                                                                                                                                                                                 |                                                                                                                                                                                                                                                                 |                                                                                                                                                                                                                                                                                                                                                                                            |   |      |   |       |   |            |   |   |   |   |   |   |   |   |   |   |   |   |    |   |    |    |
| 2  | No                                                                                                                                                                                                                                                                  |                                                                                                                                                                                                                                                                 |                                                                                                                                                                                                                                                                                                                                                                                            |   |      |   |       |   |            |   |   |   |   |   |   |   |   |   |   |   |   |    |   |    |    |
| 3  | Don't know                                                                                                                                                                                                                                                          |                                                                                                                                                                                                                                                                 |                                                                                                                                                                                                                                                                                                                                                                                            |   |      |   |       |   |            |   |   |   |   |   |   |   |   |   |   |   |   |    |   |    |    |
| 94 | pacv_2decide<br><br>Show the field ONLY if:<br>[parentguardian] = '1' or [child_1] = '2' or [child_1] = '3' or [child_2] = '2' or [child_2] = '3' or [child_3] = '2' or [child_3] = '3' or [child_4] = '2' or [child_4] = '3' or [child_5] = '2' or [child_5] = '3' | Have you ever decided not to have your child get a shot (not including flu/COVID-19 vaccine) for reasons other than illness or allergy?                                                                                                                         | radio<br><table border="1"> <tr><td>1</td><td>Yes</td></tr> <tr><td>2</td><td>No</td></tr> <tr><td>3</td><td>Don't know</td></tr> </table> <p>Custom alignment: RH<br/>Question number: 2</p>                                                                                                                                                                                              | 1 | Yes  | 2 | No    | 3 | Don't know |   |   |   |   |   |   |   |   |   |   |   |   |    |   |    |    |
| 1  | Yes                                                                                                                                                                                                                                                                 |                                                                                                                                                                                                                                                                 |                                                                                                                                                                                                                                                                                                                                                                                            |   |      |   |       |   |            |   |   |   |   |   |   |   |   |   |   |   |   |    |   |    |    |
| 2  | No                                                                                                                                                                                                                                                                  |                                                                                                                                                                                                                                                                 |                                                                                                                                                                                                                                                                                                                                                                                            |   |      |   |       |   |            |   |   |   |   |   |   |   |   |   |   |   |   |    |   |    |    |
| 3  | Don't know                                                                                                                                                                                                                                                          |                                                                                                                                                                                                                                                                 |                                                                                                                                                                                                                                                                                                                                                                                            |   |      |   |       |   |            |   |   |   |   |   |   |   |   |   |   |   |   |    |   |    |    |
| 95 | sure<br><br>Show the field ONLY if:<br>[parentguardian] = '1' or [child_1] = '2' or [child_1] = '3' or [child_2] = '2' or [child_2] = '3' or [child_3] = '2' or [child_3] = '3' or [child_4] = '2' or [child_4] = '3' or [child_5] = '2' or [child_5] = '3'         | Section Header: <i>Please answer on a scale of 0 to 10, where 0 is Not at all sure and 10 is Completely sure.</i><br><br>How sure are you that following the recommended shot schedule is a good idea for your child?                                           | radio (Matrix)<br><table border="1"> <tr><td>1</td><td>0</td></tr> <tr><td>2</td><td>1</td></tr> <tr><td>3</td><td>2</td></tr> <tr><td>4</td><td>3</td></tr> <tr><td>5</td><td>4</td></tr> <tr><td>6</td><td>5</td></tr> <tr><td>7</td><td>6</td></tr> <tr><td>8</td><td>7</td></tr> <tr><td>9</td><td>8</td></tr> <tr><td>10</td><td>9</td></tr> <tr><td>11</td><td>10</td></tr> </table> | 1 | 0    | 2 | 1     | 3 | 2          | 4 | 3 | 5 | 4 | 6 | 5 | 7 | 6 | 8 | 7 | 9 | 8 | 10 | 9 | 11 | 10 |
| 1  | 0                                                                                                                                                                                                                                                                   |                                                                                                                                                                                                                                                                 |                                                                                                                                                                                                                                                                                                                                                                                            |   |      |   |       |   |            |   |   |   |   |   |   |   |   |   |   |   |   |    |   |    |    |
| 2  | 1                                                                                                                                                                                                                                                                   |                                                                                                                                                                                                                                                                 |                                                                                                                                                                                                                                                                                                                                                                                            |   |      |   |       |   |            |   |   |   |   |   |   |   |   |   |   |   |   |    |   |    |    |
| 3  | 2                                                                                                                                                                                                                                                                   |                                                                                                                                                                                                                                                                 |                                                                                                                                                                                                                                                                                                                                                                                            |   |      |   |       |   |            |   |   |   |   |   |   |   |   |   |   |   |   |    |   |    |    |
| 4  | 3                                                                                                                                                                                                                                                                   |                                                                                                                                                                                                                                                                 |                                                                                                                                                                                                                                                                                                                                                                                            |   |      |   |       |   |            |   |   |   |   |   |   |   |   |   |   |   |   |    |   |    |    |
| 5  | 4                                                                                                                                                                                                                                                                   |                                                                                                                                                                                                                                                                 |                                                                                                                                                                                                                                                                                                                                                                                            |   |      |   |       |   |            |   |   |   |   |   |   |   |   |   |   |   |   |    |   |    |    |
| 6  | 5                                                                                                                                                                                                                                                                   |                                                                                                                                                                                                                                                                 |                                                                                                                                                                                                                                                                                                                                                                                            |   |      |   |       |   |            |   |   |   |   |   |   |   |   |   |   |   |   |    |   |    |    |
| 7  | 6                                                                                                                                                                                                                                                                   |                                                                                                                                                                                                                                                                 |                                                                                                                                                                                                                                                                                                                                                                                            |   |      |   |       |   |            |   |   |   |   |   |   |   |   |   |   |   |   |    |   |    |    |
| 8  | 7                                                                                                                                                                                                                                                                   |                                                                                                                                                                                                                                                                 |                                                                                                                                                                                                                                                                                                                                                                                            |   |      |   |       |   |            |   |   |   |   |   |   |   |   |   |   |   |   |    |   |    |    |
| 9  | 8                                                                                                                                                                                                                                                                   |                                                                                                                                                                                                                                                                 |                                                                                                                                                                                                                                                                                                                                                                                            |   |      |   |       |   |            |   |   |   |   |   |   |   |   |   |   |   |   |    |   |    |    |
| 10 | 9                                                                                                                                                                                                                                                                   |                                                                                                                                                                                                                                                                 |                                                                                                                                                                                                                                                                                                                                                                                            |   |      |   |       |   |            |   |   |   |   |   |   |   |   |   |   |   |   |    |   |    |    |
| 11 | 10                                                                                                                                                                                                                                                                  |                                                                                                                                                                                                                                                                 |                                                                                                                                                                                                                                                                                                                                                                                            |   |      |   |       |   |            |   |   |   |   |   |   |   |   |   |   |   |   |    |   |    |    |

|     |                                                                                                                                                                                                                                                                                 |                                                                                                                                                                                                                                                    |                                                                                                                                                                                                                                                                                 |   |                      |   |                   |   |          |   |                    |   |                   |
|-----|---------------------------------------------------------------------------------------------------------------------------------------------------------------------------------------------------------------------------------------------------------------------------------|----------------------------------------------------------------------------------------------------------------------------------------------------------------------------------------------------------------------------------------------------|---------------------------------------------------------------------------------------------------------------------------------------------------------------------------------------------------------------------------------------------------------------------------------|---|----------------------|---|-------------------|---|----------|---|--------------------|---|-------------------|
| 96  | <p>moreshots</p> <p>Show the field ONLY if:<br/>[parentguardian] = '1' or [child_1] = '2' or [child_1] = '3' or [child_2] = '2' or [child_2] = '3' or [child_3] = '2' or [child_3] = '3' or [child_4] = '2' or [child_4] = '3' or [child_5] = '2' or [child_5] = '3'</p>        | <p>Section Header: <i>For the following statements, choose: strongly agree, agree, not sure, disagree, strongly disagree.</i></p> <p>Children get more shots than are good for them.</p>                                                           | <p>radio (Matrix)</p> <table border="1"> <tr><td>1</td><td>Strongly agree</td></tr> <tr><td>2</td><td>Agree</td></tr> <tr><td>3</td><td>Not sure</td></tr> <tr><td>4</td><td>Disagree</td></tr> <tr><td>5</td><td>Strongly disagree</td></tr> </table>                          | 1 | Strongly agree       | 2 | Agree             | 3 | Not sure | 4 | Disagree           | 5 | Strongly disagree |
| 1   | Strongly agree                                                                                                                                                                                                                                                                  |                                                                                                                                                                                                                                                    |                                                                                                                                                                                                                                                                                 |   |                      |   |                   |   |          |   |                    |   |                   |
| 2   | Agree                                                                                                                                                                                                                                                                           |                                                                                                                                                                                                                                                    |                                                                                                                                                                                                                                                                                 |   |                      |   |                   |   |          |   |                    |   |                   |
| 3   | Not sure                                                                                                                                                                                                                                                                        |                                                                                                                                                                                                                                                    |                                                                                                                                                                                                                                                                                 |   |                      |   |                   |   |          |   |                    |   |                   |
| 4   | Disagree                                                                                                                                                                                                                                                                        |                                                                                                                                                                                                                                                    |                                                                                                                                                                                                                                                                                 |   |                      |   |                   |   |          |   |                    |   |                   |
| 5   | Strongly disagree                                                                                                                                                                                                                                                               |                                                                                                                                                                                                                                                    |                                                                                                                                                                                                                                                                                 |   |                      |   |                   |   |          |   |                    |   |                   |
| 97  | <p>shotsprevent</p> <p>Show the field ONLY if:<br/>[parentguardian] = '1' or [child_1] = '2' or [child_1] = '3' or [child_2] = '2' or [child_2] = '3' or [child_3] = '2' or [child_3] = '3' or [child_4] = '2' or [child_4] = '3' or [child_5] = '2' or [child_5] = '3'</p>     | <p>I believe many of the illnesses that shots prevent are severe.</p>                                                                                                                                                                              | <p>radio (Matrix)</p> <table border="1"> <tr><td>1</td><td>Strongly agree</td></tr> <tr><td>2</td><td>Agree</td></tr> <tr><td>3</td><td>Not sure</td></tr> <tr><td>4</td><td>Disagree</td></tr> <tr><td>5</td><td>Strongly disagree</td></tr> </table>                          | 1 | Strongly agree       | 2 | Agree             | 3 | Not sure | 4 | Disagree           | 5 | Strongly disagree |
| 1   | Strongly agree                                                                                                                                                                                                                                                                  |                                                                                                                                                                                                                                                    |                                                                                                                                                                                                                                                                                 |   |                      |   |                   |   |          |   |                    |   |                   |
| 2   | Agree                                                                                                                                                                                                                                                                           |                                                                                                                                                                                                                                                    |                                                                                                                                                                                                                                                                                 |   |                      |   |                   |   |          |   |                    |   |                   |
| 3   | Not sure                                                                                                                                                                                                                                                                        |                                                                                                                                                                                                                                                    |                                                                                                                                                                                                                                                                                 |   |                      |   |                   |   |          |   |                    |   |                   |
| 4   | Disagree                                                                                                                                                                                                                                                                        |                                                                                                                                                                                                                                                    |                                                                                                                                                                                                                                                                                 |   |                      |   |                   |   |          |   |                    |   |                   |
| 5   | Strongly disagree                                                                                                                                                                                                                                                               |                                                                                                                                                                                                                                                    |                                                                                                                                                                                                                                                                                 |   |                      |   |                   |   |          |   |                    |   |                   |
| 98  | <p>naturalinfection</p> <p>Show the field ONLY if:<br/>[parentguardian] = '1' or [child_1] = '2' or [child_1] = '3' or [child_2] = '2' or [child_2] = '3' or [child_3] = '2' or [child_3] = '3' or [child_4] = '2' or [child_4] = '3' or [child_5] = '2' or [child_5] = '3'</p> | <p>It is better for my child to develop immunity by getting sick than by getting a shot.</p>                                                                                                                                                       | <p>radio (Matrix)</p> <table border="1"> <tr><td>1</td><td>Strongly agree</td></tr> <tr><td>2</td><td>Agree</td></tr> <tr><td>3</td><td>Not sure</td></tr> <tr><td>4</td><td>Disagree</td></tr> <tr><td>5</td><td>Strongly disagree</td></tr> </table>                          | 1 | Strongly agree       | 2 | Agree             | 3 | Not sure | 4 | Disagree           | 5 | Strongly disagree |
| 1   | Strongly agree                                                                                                                                                                                                                                                                  |                                                                                                                                                                                                                                                    |                                                                                                                                                                                                                                                                                 |   |                      |   |                   |   |          |   |                    |   |                   |
| 2   | Agree                                                                                                                                                                                                                                                                           |                                                                                                                                                                                                                                                    |                                                                                                                                                                                                                                                                                 |   |                      |   |                   |   |          |   |                    |   |                   |
| 3   | Not sure                                                                                                                                                                                                                                                                        |                                                                                                                                                                                                                                                    |                                                                                                                                                                                                                                                                                 |   |                      |   |                   |   |          |   |                    |   |                   |
| 4   | Disagree                                                                                                                                                                                                                                                                        |                                                                                                                                                                                                                                                    |                                                                                                                                                                                                                                                                                 |   |                      |   |                   |   |          |   |                    |   |                   |
| 5   | Strongly disagree                                                                                                                                                                                                                                                               |                                                                                                                                                                                                                                                    |                                                                                                                                                                                                                                                                                 |   |                      |   |                   |   |          |   |                    |   |                   |
| 99  | <p>fewervaccines</p> <p>Show the field ONLY if:<br/>[parentguardian] = '1' or [child_1] = '2' or [child_1] = '3' or [child_2] = '2' or [child_2] = '3' or [child_3] = '2' or [child_3] = '3' or [child_4] = '2' or [child_4] = '3' or [child_5] = '2' or [child_5] = '3'</p>    | <p>It is better for children to get fewer vaccines at the same time.</p>                                                                                                                                                                           | <p>radio (Matrix)</p> <table border="1"> <tr><td>1</td><td>Strongly agree</td></tr> <tr><td>2</td><td>Agree</td></tr> <tr><td>3</td><td>Not sure</td></tr> <tr><td>4</td><td>Disagree</td></tr> <tr><td>5</td><td>Strongly disagree</td></tr> </table>                          | 1 | Strongly agree       | 2 | Agree             | 3 | Not sure | 4 | Disagree           | 5 | Strongly disagree |
| 1   | Strongly agree                                                                                                                                                                                                                                                                  |                                                                                                                                                                                                                                                    |                                                                                                                                                                                                                                                                                 |   |                      |   |                   |   |          |   |                    |   |                   |
| 2   | Agree                                                                                                                                                                                                                                                                           |                                                                                                                                                                                                                                                    |                                                                                                                                                                                                                                                                                 |   |                      |   |                   |   |          |   |                    |   |                   |
| 3   | Not sure                                                                                                                                                                                                                                                                        |                                                                                                                                                                                                                                                    |                                                                                                                                                                                                                                                                                 |   |                      |   |                   |   |          |   |                    |   |                   |
| 4   | Disagree                                                                                                                                                                                                                                                                        |                                                                                                                                                                                                                                                    |                                                                                                                                                                                                                                                                                 |   |                      |   |                   |   |          |   |                    |   |                   |
| 5   | Strongly disagree                                                                                                                                                                                                                                                               |                                                                                                                                                                                                                                                    |                                                                                                                                                                                                                                                                                 |   |                      |   |                   |   |          |   |                    |   |                   |
| 100 | <p>sideeffect</p> <p>Show the field ONLY if:<br/>[parentguardian] = '1' or [child_1] = '2' or [child_1] = '3' or [child_2] = '2' or [child_2] = '3' or [child_3] = '2' or [child_3] = '3' or [child_4] = '2' or [child_4] = '3' or [child_5] = '2' or [child_5] = '3'</p>       | <p>Section Header: <i>For the following statements, choose: not at all concerned, not too concerned, not sure, somewhat concerned, very concerned</i></p> <p>How concerned are you that your child may have a serious side effect from a shot?</p> | <p>radio (Matrix)</p> <table border="1"> <tr><td>1</td><td>not at all concerned</td></tr> <tr><td>2</td><td>not too concerned</td></tr> <tr><td>3</td><td>not sure</td></tr> <tr><td>4</td><td>somewhat concerned</td></tr> <tr><td>5</td><td>very concerned</td></tr> </table> | 1 | not at all concerned | 2 | not too concerned | 3 | not sure | 4 | somewhat concerned | 5 | very concerned    |
| 1   | not at all concerned                                                                                                                                                                                                                                                            |                                                                                                                                                                                                                                                    |                                                                                                                                                                                                                                                                                 |   |                      |   |                   |   |          |   |                    |   |                   |
| 2   | not too concerned                                                                                                                                                                                                                                                               |                                                                                                                                                                                                                                                    |                                                                                                                                                                                                                                                                                 |   |                      |   |                   |   |          |   |                    |   |                   |
| 3   | not sure                                                                                                                                                                                                                                                                        |                                                                                                                                                                                                                                                    |                                                                                                                                                                                                                                                                                 |   |                      |   |                   |   |          |   |                    |   |                   |
| 4   | somewhat concerned                                                                                                                                                                                                                                                              |                                                                                                                                                                                                                                                    |                                                                                                                                                                                                                                                                                 |   |                      |   |                   |   |          |   |                    |   |                   |
| 5   | very concerned                                                                                                                                                                                                                                                                  |                                                                                                                                                                                                                                                    |                                                                                                                                                                                                                                                                                 |   |                      |   |                   |   |          |   |                    |   |                   |
| 101 | <p>notsafe</p> <p>Show the field ONLY if:<br/>[parentguardian] = '1' or [child_1] = '2' or [child_1] = '3' or [child_2] = '2' or [child_2] = '3' or [child_3] = '2' or [child_3] = '3' or [child_4] = '2' or [child_4] = '3' or [child_5] = '2' or [child_5] = '3'</p>          | <p>How concerned are you that one of the childhood shots may not be safe?</p>                                                                                                                                                                      | <p>radio (Matrix)</p> <table border="1"> <tr><td>1</td><td>not at all concerned</td></tr> <tr><td>2</td><td>not too concerned</td></tr> <tr><td>3</td><td>not sure</td></tr> <tr><td>4</td><td>somewhat concerned</td></tr> <tr><td>5</td><td>very concerned</td></tr> </table> | 1 | not at all concerned | 2 | not too concerned | 3 | not sure | 4 | somewhat concerned | 5 | very concerned    |
| 1   | not at all concerned                                                                                                                                                                                                                                                            |                                                                                                                                                                                                                                                    |                                                                                                                                                                                                                                                                                 |   |                      |   |                   |   |          |   |                    |   |                   |
| 2   | not too concerned                                                                                                                                                                                                                                                               |                                                                                                                                                                                                                                                    |                                                                                                                                                                                                                                                                                 |   |                      |   |                   |   |          |   |                    |   |                   |
| 3   | not sure                                                                                                                                                                                                                                                                        |                                                                                                                                                                                                                                                    |                                                                                                                                                                                                                                                                                 |   |                      |   |                   |   |          |   |                    |   |                   |
| 4   | somewhat concerned                                                                                                                                                                                                                                                              |                                                                                                                                                                                                                                                    |                                                                                                                                                                                                                                                                                 |   |                      |   |                   |   |          |   |                    |   |                   |
| 5   | very concerned                                                                                                                                                                                                                                                                  |                                                                                                                                                                                                                                                    |                                                                                                                                                                                                                                                                                 |   |                      |   |                   |   |          |   |                    |   |                   |
| 102 | <p>notprevent</p> <p>Show the field ONLY if:<br/>[parentguardian] = '1' or [child_1] = '2' or [child_1] = '3' or [child_2] = '2' or [child_2] = '3' or [child_3] = '2' or [child_3] = '3' or [child_4] = '2' or [child_4] = '3' or [child_5] = '2' or [child_5] = '3'</p>       | <p>How concerned are you that the shot may not prevent the disease?</p>                                                                                                                                                                            | <p>radio (Matrix)</p> <table border="1"> <tr><td>1</td><td>not at all concerned</td></tr> <tr><td>2</td><td>not too concerned</td></tr> <tr><td>3</td><td>not sure</td></tr> <tr><td>4</td><td>somewhat concerned</td></tr> <tr><td>5</td><td>very concerned</td></tr> </table> | 1 | not at all concerned | 2 | not too concerned | 3 | not sure | 4 | somewhat concerned | 5 | very concerned    |
| 1   | not at all concerned                                                                                                                                                                                                                                                            |                                                                                                                                                                                                                                                    |                                                                                                                                                                                                                                                                                 |   |                      |   |                   |   |          |   |                    |   |                   |
| 2   | not too concerned                                                                                                                                                                                                                                                               |                                                                                                                                                                                                                                                    |                                                                                                                                                                                                                                                                                 |   |                      |   |                   |   |          |   |                    |   |                   |
| 3   | not sure                                                                                                                                                                                                                                                                        |                                                                                                                                                                                                                                                    |                                                                                                                                                                                                                                                                                 |   |                      |   |                   |   |          |   |                    |   |                   |
| 4   | somewhat concerned                                                                                                                                                                                                                                                              |                                                                                                                                                                                                                                                    |                                                                                                                                                                                                                                                                                 |   |                      |   |                   |   |          |   |                    |   |                   |
| 5   | very concerned                                                                                                                                                                                                                                                                  |                                                                                                                                                                                                                                                    |                                                                                                                                                                                                                                                                                 |   |                      |   |                   |   |          |   |                    |   |                   |



|     |                                                                                                                                                                                                                                                                                                   |                                                                                                                                                                                                        |                                                                                                                                                                                                                                                                                                                                                                                                                                |   |                     |   |                  |   |            |   |                   |   |                    |   |   |   |   |   |   |   |   |    |   |    |    |
|-----|---------------------------------------------------------------------------------------------------------------------------------------------------------------------------------------------------------------------------------------------------------------------------------------------------|--------------------------------------------------------------------------------------------------------------------------------------------------------------------------------------------------------|--------------------------------------------------------------------------------------------------------------------------------------------------------------------------------------------------------------------------------------------------------------------------------------------------------------------------------------------------------------------------------------------------------------------------------|---|---------------------|---|------------------|---|------------|---|-------------------|---|--------------------|---|---|---|---|---|---|---|---|----|---|----|----|
| 103 | <p>pacv_6</p> <p>Show the field ONLY if:<br/>                     [parentguardian] = '1' or [child_1] = '2' or [child_1] = '3' or [child_2] = '2' or [child_2] = '3' or [child_3] = '2' or [child_3] = '3' or [child_4] = '2' or [child_4] = '3' or [child_5] = '2' or [child_5] = '3'</p>        | <p>If you had another infant today, would you want him/her to get all the recommended shots?</p>                                                                                                       | <p>radio</p> <table border="1" data-bbox="1040 111 1190 233"> <tr><td>1</td><td>Yes</td></tr> <tr><td>2</td><td>No</td></tr> <tr><td>3</td><td>Don't know</td></tr> </table> <p>Custom alignment: RH</p>                                                                                                                                                                                                                       | 1 | Yes                 | 2 | No               | 3 | Don't know |   |                   |   |                    |   |   |   |   |   |   |   |   |    |   |    |    |
| 1   | Yes                                                                                                                                                                                                                                                                                               |                                                                                                                                                                                                        |                                                                                                                                                                                                                                                                                                                                                                                                                                |   |                     |   |                  |   |            |   |                   |   |                    |   |   |   |   |   |   |   |   |    |   |    |    |
| 2   | No                                                                                                                                                                                                                                                                                                |                                                                                                                                                                                                        |                                                                                                                                                                                                                                                                                                                                                                                                                                |   |                     |   |                  |   |            |   |                   |   |                    |   |   |   |   |   |   |   |   |    |   |    |    |
| 3   | Don't know                                                                                                                                                                                                                                                                                        |                                                                                                                                                                                                        |                                                                                                                                                                                                                                                                                                                                                                                                                                |   |                     |   |                  |   |            |   |                   |   |                    |   |   |   |   |   |   |   |   |    |   |    |    |
| 104 | <p>pacv_7</p> <p>Show the field ONLY if:<br/>                     [parentguardian] = '1' or [child_1] = '2' or [child_1] = '3' or [child_2] = '2' or [child_2] = '3' or [child_3] = '2' or [child_3] = '3' or [child_4] = '2' or [child_4] = '3' or [child_5] = '2' or [child_5] = '3'</p>        | <p>Overall, how hesitant about childhood shots would you consider yourself to be?</p>                                                                                                                  | <p>radio</p> <table border="1" data-bbox="1040 380 1260 581"> <tr><td>1</td><td>not at all hesitant</td></tr> <tr><td>2</td><td>not too hesitant</td></tr> <tr><td>3</td><td>not sure</td></tr> <tr><td>4</td><td>somewhat hesitant</td></tr> <tr><td>5</td><td>very hesitant</td></tr> </table> <p>Custom alignment: RH</p>                                                                                                   | 1 | not at all hesitant | 2 | not too hesitant | 3 | not sure   | 4 | somewhat hesitant | 5 | very hesitant      |   |   |   |   |   |   |   |   |    |   |    |    |
| 1   | not at all hesitant                                                                                                                                                                                                                                                                               |                                                                                                                                                                                                        |                                                                                                                                                                                                                                                                                                                                                                                                                                |   |                     |   |                  |   |            |   |                   |   |                    |   |   |   |   |   |   |   |   |    |   |    |    |
| 2   | not too hesitant                                                                                                                                                                                                                                                                                  |                                                                                                                                                                                                        |                                                                                                                                                                                                                                                                                                                                                                                                                                |   |                     |   |                  |   |            |   |                   |   |                    |   |   |   |   |   |   |   |   |    |   |    |    |
| 3   | not sure                                                                                                                                                                                                                                                                                          |                                                                                                                                                                                                        |                                                                                                                                                                                                                                                                                                                                                                                                                                |   |                     |   |                  |   |            |   |                   |   |                    |   |   |   |   |   |   |   |   |    |   |    |    |
| 4   | somewhat hesitant                                                                                                                                                                                                                                                                                 |                                                                                                                                                                                                        |                                                                                                                                                                                                                                                                                                                                                                                                                                |   |                     |   |                  |   |            |   |                   |   |                    |   |   |   |   |   |   |   |   |    |   |    |    |
| 5   | very hesitant                                                                                                                                                                                                                                                                                     |                                                                                                                                                                                                        |                                                                                                                                                                                                                                                                                                                                                                                                                                |   |                     |   |                  |   |            |   |                   |   |                    |   |   |   |   |   |   |   |   |    |   |    |    |
| 105 | <p>pacv_modified</p> <p>Show the field ONLY if:<br/>                     [parentguardian] = '1' or [child_1] = '2' or [child_1] = '3' or [child_2] = '2' or [child_2] = '3' or [child_3] = '2' or [child_3] = '3' or [child_4] = '2' or [child_4] = '3' or [child_5] = '2' or [child_5] = '3'</p> | <p>Overall, how hesitant about COVID-19 vaccine for children would you consider yourself to be?</p>                                                                                                    | <p>radio</p> <table border="1" data-bbox="1040 674 1260 875"> <tr><td>1</td><td>not at all hesitant</td></tr> <tr><td>2</td><td>not too hesitant</td></tr> <tr><td>3</td><td>not sure</td></tr> <tr><td>4</td><td>somewhat hesitant</td></tr> <tr><td>5</td><td>very hesitant</td></tr> </table> <p>Custom alignment: RH</p>                                                                                                   | 1 | not at all hesitant | 2 | not too hesitant | 3 | not sure   | 4 | somewhat hesitant | 5 | very hesitant      |   |   |   |   |   |   |   |   |    |   |    |    |
| 1   | not at all hesitant                                                                                                                                                                                                                                                                               |                                                                                                                                                                                                        |                                                                                                                                                                                                                                                                                                                                                                                                                                |   |                     |   |                  |   |            |   |                   |   |                    |   |   |   |   |   |   |   |   |    |   |    |    |
| 2   | not too hesitant                                                                                                                                                                                                                                                                                  |                                                                                                                                                                                                        |                                                                                                                                                                                                                                                                                                                                                                                                                                |   |                     |   |                  |   |            |   |                   |   |                    |   |   |   |   |   |   |   |   |    |   |    |    |
| 3   | not sure                                                                                                                                                                                                                                                                                          |                                                                                                                                                                                                        |                                                                                                                                                                                                                                                                                                                                                                                                                                |   |                     |   |                  |   |            |   |                   |   |                    |   |   |   |   |   |   |   |   |    |   |    |    |
| 4   | somewhat hesitant                                                                                                                                                                                                                                                                                 |                                                                                                                                                                                                        |                                                                                                                                                                                                                                                                                                                                                                                                                                |   |                     |   |                  |   |            |   |                   |   |                    |   |   |   |   |   |   |   |   |    |   |    |    |
| 5   | very hesitant                                                                                                                                                                                                                                                                                     |                                                                                                                                                                                                        |                                                                                                                                                                                                                                                                                                                                                                                                                                |   |                     |   |                  |   |            |   |                   |   |                    |   |   |   |   |   |   |   |   |    |   |    |    |
| 106 | <p>trust</p> <p>Show the field ONLY if:<br/>                     [parentguardian] = '1' or [child_1] = '2' or [child_1] = '3' or [child_2] = '2' or [child_2] = '3' or [child_3] = '2' or [child_3] = '3' or [child_4] = '2' or [child_4] = '3' or [child_5] = '2' or [child_5] = '3'</p>         | <p>Section Header: <i>For the following statements, choose: strongly agree, agree, not sure, disagree, strongly disagree.</i></p> <p>I trust the information I receive about shots.</p>                | <p>radio (Matrix)</p> <table border="1" data-bbox="1040 968 1247 1169"> <tr><td>1</td><td>strongly agree</td></tr> <tr><td>2</td><td>agree</td></tr> <tr><td>3</td><td>not sure</td></tr> <tr><td>4</td><td>disagree</td></tr> <tr><td>5</td><td>strongly disagree.</td></tr> </table>                                                                                                                                         | 1 | strongly agree      | 2 | agree            | 3 | not sure   | 4 | disagree          | 5 | strongly disagree. |   |   |   |   |   |   |   |   |    |   |    |    |
| 1   | strongly agree                                                                                                                                                                                                                                                                                    |                                                                                                                                                                                                        |                                                                                                                                                                                                                                                                                                                                                                                                                                |   |                     |   |                  |   |            |   |                   |   |                    |   |   |   |   |   |   |   |   |    |   |    |    |
| 2   | agree                                                                                                                                                                                                                                                                                             |                                                                                                                                                                                                        |                                                                                                                                                                                                                                                                                                                                                                                                                                |   |                     |   |                  |   |            |   |                   |   |                    |   |   |   |   |   |   |   |   |    |   |    |    |
| 3   | not sure                                                                                                                                                                                                                                                                                          |                                                                                                                                                                                                        |                                                                                                                                                                                                                                                                                                                                                                                                                                |   |                     |   |                  |   |            |   |                   |   |                    |   |   |   |   |   |   |   |   |    |   |    |    |
| 4   | disagree                                                                                                                                                                                                                                                                                          |                                                                                                                                                                                                        |                                                                                                                                                                                                                                                                                                                                                                                                                                |   |                     |   |                  |   |            |   |                   |   |                    |   |   |   |   |   |   |   |   |    |   |    |    |
| 5   | strongly disagree.                                                                                                                                                                                                                                                                                |                                                                                                                                                                                                        |                                                                                                                                                                                                                                                                                                                                                                                                                                |   |                     |   |                  |   |            |   |                   |   |                    |   |   |   |   |   |   |   |   |    |   |    |    |
| 107 | <p>opendoctor</p> <p>Show the field ONLY if:<br/>                     [parentguardian] = '1' or [child_1] = '2' or [child_1] = '3' or [child_2] = '2' or [child_2] = '3' or [child_3] = '2' or [child_3] = '3' or [child_4] = '2' or [child_4] = '3' or [child_5] = '2' or [child_5] = '3'</p>    | <p>I am able to openly discuss my concerns about shots with my child's doctor.</p>                                                                                                                     | <p>radio (Matrix)</p> <table border="1" data-bbox="1040 1236 1247 1438"> <tr><td>1</td><td>strongly agree</td></tr> <tr><td>2</td><td>agree</td></tr> <tr><td>3</td><td>not sure</td></tr> <tr><td>4</td><td>disagree</td></tr> <tr><td>5</td><td>strongly disagree.</td></tr> </table>                                                                                                                                        | 1 | strongly agree      | 2 | agree            | 3 | not sure   | 4 | disagree          | 5 | strongly disagree. |   |   |   |   |   |   |   |   |    |   |    |    |
| 1   | strongly agree                                                                                                                                                                                                                                                                                    |                                                                                                                                                                                                        |                                                                                                                                                                                                                                                                                                                                                                                                                                |   |                     |   |                  |   |            |   |                   |   |                    |   |   |   |   |   |   |   |   |    |   |    |    |
| 2   | agree                                                                                                                                                                                                                                                                                             |                                                                                                                                                                                                        |                                                                                                                                                                                                                                                                                                                                                                                                                                |   |                     |   |                  |   |            |   |                   |   |                    |   |   |   |   |   |   |   |   |    |   |    |    |
| 3   | not sure                                                                                                                                                                                                                                                                                          |                                                                                                                                                                                                        |                                                                                                                                                                                                                                                                                                                                                                                                                                |   |                     |   |                  |   |            |   |                   |   |                    |   |   |   |   |   |   |   |   |    |   |    |    |
| 4   | disagree                                                                                                                                                                                                                                                                                          |                                                                                                                                                                                                        |                                                                                                                                                                                                                                                                                                                                                                                                                                |   |                     |   |                  |   |            |   |                   |   |                    |   |   |   |   |   |   |   |   |    |   |    |    |
| 5   | strongly disagree.                                                                                                                                                                                                                                                                                |                                                                                                                                                                                                        |                                                                                                                                                                                                                                                                                                                                                                                                                                |   |                     |   |                  |   |            |   |                   |   |                    |   |   |   |   |   |   |   |   |    |   |    |    |
| 108 | <p>pacv_9</p> <p>Show the field ONLY if:<br/>                     [parentguardian] = '1' or [child_1] = '2' or [child_1] = '3' or [child_2] = '2' or [child_2] = '3' or [child_3] = '2' or [child_3] = '3' or [child_4] = '2' or [child_4] = '3' or [child_5] = '2' or [child_5] = '3'</p>        | <p>Section Header: <i>Please answer on a scale of 0 to 10, where 0 is Do not trust at all and 10 is Completely trust.</i></p> <p>All things considered, how much do you trust your child's doctor?</p> | <p>radio (Matrix)</p> <table border="1" data-bbox="1040 1505 1122 1942"> <tr><td>1</td><td>0</td></tr> <tr><td>2</td><td>1</td></tr> <tr><td>3</td><td>2</td></tr> <tr><td>4</td><td>3</td></tr> <tr><td>5</td><td>4</td></tr> <tr><td>6</td><td>5</td></tr> <tr><td>7</td><td>6</td></tr> <tr><td>8</td><td>7</td></tr> <tr><td>9</td><td>8</td></tr> <tr><td>10</td><td>9</td></tr> <tr><td>11</td><td>10</td></tr> </table> | 1 | 0                   | 2 | 1                | 3 | 2          | 4 | 3                 | 5 | 4                  | 6 | 5 | 7 | 6 | 8 | 7 | 9 | 8 | 10 | 9 | 11 | 10 |
| 1   | 0                                                                                                                                                                                                                                                                                                 |                                                                                                                                                                                                        |                                                                                                                                                                                                                                                                                                                                                                                                                                |   |                     |   |                  |   |            |   |                   |   |                    |   |   |   |   |   |   |   |   |    |   |    |    |
| 2   | 1                                                                                                                                                                                                                                                                                                 |                                                                                                                                                                                                        |                                                                                                                                                                                                                                                                                                                                                                                                                                |   |                     |   |                  |   |            |   |                   |   |                    |   |   |   |   |   |   |   |   |    |   |    |    |
| 3   | 2                                                                                                                                                                                                                                                                                                 |                                                                                                                                                                                                        |                                                                                                                                                                                                                                                                                                                                                                                                                                |   |                     |   |                  |   |            |   |                   |   |                    |   |   |   |   |   |   |   |   |    |   |    |    |
| 4   | 3                                                                                                                                                                                                                                                                                                 |                                                                                                                                                                                                        |                                                                                                                                                                                                                                                                                                                                                                                                                                |   |                     |   |                  |   |            |   |                   |   |                    |   |   |   |   |   |   |   |   |    |   |    |    |
| 5   | 4                                                                                                                                                                                                                                                                                                 |                                                                                                                                                                                                        |                                                                                                                                                                                                                                                                                                                                                                                                                                |   |                     |   |                  |   |            |   |                   |   |                    |   |   |   |   |   |   |   |   |    |   |    |    |
| 6   | 5                                                                                                                                                                                                                                                                                                 |                                                                                                                                                                                                        |                                                                                                                                                                                                                                                                                                                                                                                                                                |   |                     |   |                  |   |            |   |                   |   |                    |   |   |   |   |   |   |   |   |    |   |    |    |
| 7   | 6                                                                                                                                                                                                                                                                                                 |                                                                                                                                                                                                        |                                                                                                                                                                                                                                                                                                                                                                                                                                |   |                     |   |                  |   |            |   |                   |   |                    |   |   |   |   |   |   |   |   |    |   |    |    |
| 8   | 7                                                                                                                                                                                                                                                                                                 |                                                                                                                                                                                                        |                                                                                                                                                                                                                                                                                                                                                                                                                                |   |                     |   |                  |   |            |   |                   |   |                    |   |   |   |   |   |   |   |   |    |   |    |    |
| 9   | 8                                                                                                                                                                                                                                                                                                 |                                                                                                                                                                                                        |                                                                                                                                                                                                                                                                                                                                                                                                                                |   |                     |   |                  |   |            |   |                   |   |                    |   |   |   |   |   |   |   |   |    |   |    |    |
| 10  | 9                                                                                                                                                                                                                                                                                                 |                                                                                                                                                                                                        |                                                                                                                                                                                                                                                                                                                                                                                                                                |   |                     |   |                  |   |            |   |                   |   |                    |   |   |   |   |   |   |   |   |    |   |    |    |
| 11  | 10                                                                                                                                                                                                                                                                                                |                                                                                                                                                                                                        |                                                                                                                                                                                                                                                                                                                                                                                                                                |   |                     |   |                  |   |            |   |                   |   |                    |   |   |   |   |   |   |   |   |    |   |    |    |

|     |                                                                                                                             |                                                                                                                                                              |                                                                                                                                                                                                                                                                                        |   |                     |   |                  |   |          |   |                   |   |               |
|-----|-----------------------------------------------------------------------------------------------------------------------------|--------------------------------------------------------------------------------------------------------------------------------------------------------------|----------------------------------------------------------------------------------------------------------------------------------------------------------------------------------------------------------------------------------------------------------------------------------------|---|---------------------|---|------------------|---|----------|---|-------------------|---|---------------|
| 109 | overall                                                                                                                     | Section Header: <i>Final section: Please answer the questions below.</i><br>Overall, how hesitant about COVID-19 vaccines would you consider yourself to be? | radio<br><table border="1"> <tr><td>1</td><td>not at all hesitant</td></tr> <tr><td>2</td><td>not too hesitant</td></tr> <tr><td>3</td><td>not sure</td></tr> <tr><td>4</td><td>somewhat hesitant</td></tr> <tr><td>5</td><td>very hesitant</td></tr> </table><br>Custom alignment: RH | 1 | not at all hesitant | 2 | not too hesitant | 3 | not sure | 4 | somewhat hesitant | 5 | very hesitant |
| 1   | not at all hesitant                                                                                                         |                                                                                                                                                              |                                                                                                                                                                                                                                                                                        |   |                     |   |                  |   |          |   |                   |   |               |
| 2   | not too hesitant                                                                                                            |                                                                                                                                                              |                                                                                                                                                                                                                                                                                        |   |                     |   |                  |   |          |   |                   |   |               |
| 3   | not sure                                                                                                                    |                                                                                                                                                              |                                                                                                                                                                                                                                                                                        |   |                     |   |                  |   |          |   |                   |   |               |
| 4   | somewhat hesitant                                                                                                           |                                                                                                                                                              |                                                                                                                                                                                                                                                                                        |   |                     |   |                  |   |          |   |                   |   |               |
| 5   | very hesitant                                                                                                               |                                                                                                                                                              |                                                                                                                                                                                                                                                                                        |   |                     |   |                  |   |          |   |                   |   |               |
| 110 | overall_slider                                                                                                              | Using the sliding scale, please rate overall, how hesitant about COVID-19 vaccines would you consider yourself to be?                                        | slider (number)<br>Slider labels: not at all hesitant, not sure, very hesitant<br>Custom alignment: RH                                                                                                                                                                                 |   |                     |   |                  |   |          |   |                   |   |               |
| 111 | interestedbooster<br><br>Show the field ONLY if:<br>[boosterreceived] = '0' or [boostersched] = '0' or [boosterevent] = '0' | How likely are you to get the COVID-19 booster shot?                                                                                                         | radio<br><table border="1"> <tr><td>0</td><td>very likely</td></tr> <tr><td>1</td><td>likely</td></tr> <tr><td>2</td><td>not sure</td></tr> <tr><td>3</td><td>unlikely</td></tr> <tr><td>4</td><td>very unlikely</td></tr> </table>                                                    | 0 | very likely         | 1 | likely           | 2 | not sure | 3 | unlikely          | 4 | very unlikely |
| 0   | very likely                                                                                                                 |                                                                                                                                                              |                                                                                                                                                                                                                                                                                        |   |                     |   |                  |   |          |   |                   |   |               |
| 1   | likely                                                                                                                      |                                                                                                                                                              |                                                                                                                                                                                                                                                                                        |   |                     |   |                  |   |          |   |                   |   |               |
| 2   | not sure                                                                                                                    |                                                                                                                                                              |                                                                                                                                                                                                                                                                                        |   |                     |   |                  |   |          |   |                   |   |               |
| 3   | unlikely                                                                                                                    |                                                                                                                                                              |                                                                                                                                                                                                                                                                                        |   |                     |   |                  |   |          |   |                   |   |               |
| 4   | very unlikely                                                                                                               |                                                                                                                                                              |                                                                                                                                                                                                                                                                                        |   |                     |   |                  |   |          |   |                   |   |               |
| 112 | f_groups                                                                                                                    | Are you interested in participating in focus groups related to topics covered in this survey?                                                                | yesno<br><table border="1"> <tr><td>1</td><td>Yes</td></tr> <tr><td>0</td><td>No</td></tr> </table>                                                                                                                                                                                    | 1 | Yes                 | 0 | No               |   |          |   |                   |   |               |
| 1   | Yes                                                                                                                         |                                                                                                                                                              |                                                                                                                                                                                                                                                                                        |   |                     |   |                  |   |          |   |                   |   |               |
| 0   | No                                                                                                                          |                                                                                                                                                              |                                                                                                                                                                                                                                                                                        |   |                     |   |                  |   |          |   |                   |   |               |
| 113 | email<br><br>Show the field ONLY if:<br>[f_groups] = '1'                                                                    | Please enter your Northwell email address so we can contact you (your responses to this survey will still be anonymous):                                     | text (email)                                                                                                                                                                                                                                                                           |   |                     |   |                  |   |          |   |                   |   |               |
| 114 | raffle                                                                                                                      | Are you interested in participating in a raffle?                                                                                                             | yesno<br><table border="1"> <tr><td>1</td><td>Yes</td></tr> <tr><td>0</td><td>No</td></tr> </table>                                                                                                                                                                                    | 1 | Yes                 | 0 | No               |   |          |   |                   |   |               |
| 1   | Yes                                                                                                                         |                                                                                                                                                              |                                                                                                                                                                                                                                                                                        |   |                     |   |                  |   |          |   |                   |   |               |
| 0   | No                                                                                                                          |                                                                                                                                                              |                                                                                                                                                                                                                                                                                        |   |                     |   |                  |   |          |   |                   |   |               |
| 115 | email_raffle<br><br>Show the field ONLY if:<br>[raffle] = '1'                                                               | Please enter your Northwell email address so we can contact you (your responses to this survey will still be anonymous):                                     | text (email)                                                                                                                                                                                                                                                                           |   |                     |   |                  |   |          |   |                   |   |               |
| 116 | educate_to_vaccinate_complete                                                                                               | Section Header: <i>Form Status</i><br>Complete?                                                                                                              | dropdown<br><table border="1"> <tr><td>0</td><td>Incomplete</td></tr> <tr><td>1</td><td>Unverified</td></tr> <tr><td>2</td><td>Complete</td></tr> </table>                                                                                                                             | 0 | Incomplete          | 1 | Unverified       | 2 | Complete |   |                   |   |               |
| 0   | Incomplete                                                                                                                  |                                                                                                                                                              |                                                                                                                                                                                                                                                                                        |   |                     |   |                  |   |          |   |                   |   |               |
| 1   | Unverified                                                                                                                  |                                                                                                                                                              |                                                                                                                                                                                                                                                                                        |   |                     |   |                  |   |          |   |                   |   |               |
| 2   | Complete                                                                                                                    |                                                                                                                                                              |                                                                                                                                                                                                                                                                                        |   |                     |   |                  |   |          |   |                   |   |               |
